# Supplementary material for: Fusion and Fission of Cognitive Functions in the Human Parietal Cortex
Source: PubMed Central journal article supplement (PMC4585503; doi:10.1093/cercor/bhu198), 2014-09-09
Supplement: supp_bhu198_bhu198supp_table1.pdf [file supp_bhu198_bhu198supp_table1.pdf]

| Domain              | Study                | N   | Stimuli | Task              | Contrast            | X MNI                | Y MNI | Z MNI |            |                     |     |     |    |
|---------------------|----------------------|-----|---------|-------------------|---------------------|----------------------|-------|-------|------------|---------------------|-----|-----|----|
| Automatic semantics | Assaf et al., 2006   | 18  | Words   | Semantic decision | Related > unrelated | -12                  | 46    | -2    |            |                     |     |     |    |
|                     |                      |     |         |                   |                     | -8                   | -36   | 38    |            |                     |     |     |    |
|                     |                      |     |         |                   |                     | -40                  | -47   | 50    |            |                     |     |     |    |
|                     |                      |     |         |                   |                     | -66                  | -55   | -4    |            |                     |     |     |    |
|                     | Bedny et al., 2006   | 13  | Words   | Semantic decision | Concrete > Abstract | -27                  | -78   | 39    |            |                     |     |     |    |
|                     |                      |     |         |                   |                     | -21                  | 18    | 54    |            |                     |     |     |    |
|                     |                      |     |         |                   |                     | 45                   | -69   | 24    |            |                     |     |     |    |
|                     |                      |     |         |                   |                     | -37                  | -74   | 26    |            |                     |     |     |    |
|                     | Binder et al., 2005a | 24  | Words   | Lexical decision  | Concrete > abstract | 52                   | -58   | 22    |            |                     |     |     |    |
|                     |                      |     |         |                   |                     | 54                   | -48   | 33    |            |                     |     |     |    |
|                     |                      |     |         |                   |                     | 49                   | -49   | 14    |            |                     |     |     |    |
|                     |                      |     |         |                   |                     | -28                  | 25    | 48    |            |                     |     |     |    |
|                     |                      |     |         |                   |                     | -38                  | 19    | 42    |            |                     |     |     |    |
|                     |                      |     |         |                   |                     | -12                  | -56   | 11    |            |                     |     |     |    |
|                     |                      |     |         |                   |                     | -9                   | -45   | 13    |            |                     |     |     |    |
|                     |                      |     |         |                   |                     | -7                   | -37   | 36    |            |                     |     |     |    |
|                     |                      |     |         |                   |                     | 5                    | -35   | 38    |            |                     |     |     |    |
|                     |                      |     |         |                   |                     | -12                  | -62   | 24    |            |                     |     |     |    |
|                     |                      |     |         |                   |                     | -3                   | -74   | 31    |            |                     |     |     |    |
|                     |                      |     |         |                   |                     | 6                    | -68   | 30    |            |                     |     |     |    |
|                     |                      |     |         |                   |                     | 11                   | -54   | 35    |            |                     |     |     |    |
|                     |                      |     |         |                   |                     | 3                    | -62   | 41    |            |                     |     |     |    |
|                     |                      |     |         |                   |                     | Binder et al., 2005b | 24    | Words | Read aloud | Concrete > Abstract | -60 | -53 | 36 |
|                     |                      |     |         |                   |                     |                      |       |       |            |                     | -50 | -58 | 32 |
| -49                 | -70                  | 40  |         |                   |                     |                      |       |       |            |                     |     |     |    |
| 60                  | -57                  | 24  |         |                   |                     |                      |       |       |            |                     |     |     |    |
| 48                  | -60                  | 20  |         |                   |                     |                      |       |       |            |                     |     |     |    |
| 62                  | -46                  | 38  |         |                   |                     |                      |       |       |            |                     |     |     |    |
| 43                  | -74                  | 45  |         |                   |                     |                      |       |       |            |                     |     |     |    |
| 61                  | -68                  | 40  |         |                   |                     |                      |       |       |            |                     |     |     |    |
| 47                  | -57                  | 56  |         |                   |                     |                      |       |       |            |                     |     |     |    |
| 44                  | -57                  | 41  |         |                   |                     |                      |       |       |            |                     |     |     |    |
| 44                  | -68                  | 56  |         |                   |                     |                      |       |       |            |                     |     |     |    |
| 56                  | -17                  | -22 |         |                   |                     |                      |       |       |            |                     |     |     |    |
| 61                  | -51                  | 4   |         |                   |                     |                      |       |       |            |                     |     |     |    |
| 55                  | -6                   | -31 |         |                   |                     |                      |       |       |            |                     |     |     |    |
| 52                  | -48                  | 11  |         |                   |                     |                      |       |       |            |                     |     |     |    |



|  |                         |    |           |                                      |                            |     |     |     |
|--|-------------------------|----|-----------|--------------------------------------|----------------------------|-----|-----|-----|
|  |                         |    |           |                                      |                            | 33  | 37  | 44  |
|  |                         |    |           |                                      |                            | 41  | 37  | 32  |
|  |                         |    |           |                                      |                            | 27  | 25  | 38  |
|  |                         |    |           |                                      |                            | 21  | 48  | 17  |
|  |                         |    |           |                                      |                            | 24  | 56  | -8  |
|  |                         |    |           |                                      |                            | 20  | 54  | 28  |
|  |                         |    |           |                                      |                            | 24  | 39  | 31  |
|  |                         |    |           |                                      |                            | 23  | 32  | 54  |
|  |                         |    |           |                                      |                            | 13  | 53  | -8  |
|  |                         |    |           |                                      |                            | -29 | -39 | -11 |
|  |                         |    |           |                                      |                            | -7  | -52 | 37  |
|  |                         |    |           |                                      |                            | -7  | -70 | 19  |
|  |                         |    |           |                                      |                            | -4  | -70 | 42  |
|  |                         |    |           |                                      |                            | -16 | -51 | 24  |
|  |                         |    |           |                                      |                            | 0   | -51 | 47  |
|  |                         |    |           |                                      |                            | 9   | -49 | 36  |
|  |                         |    |           |                                      |                            | 10  | -53 | 24  |
|  | Booth et al., 2006      | 13 | Words     | Semantic decision vs. phonological d | Semantic decision > phonol | -39 | -57 | 18  |
|  | Demonet et al., 1992    | 9  | Words     | Lexical decision                     | Words > Phonemes           | -48 | -55 | 42  |
|  |                         |    |           |                                      |                            | -50 | -55 | 38  |
|  |                         |    |           |                                      |                            | -50 | -55 | 33  |
|  |                         |    |           |                                      |                            | -20 | 38  | 41  |
|  |                         |    |           |                                      |                            | -20 | 37  | 37  |
|  |                         |    |           |                                      |                            | -18 | 39  | 32  |
|  |                         |    |           |                                      |                            | -1  | -60 | 28  |
|  |                         |    |           |                                      |                            | -1  | -60 | 24  |
|  | Devlin et al., 2003     | 12 | Words     | Semantic decision vs. phonological d | Semantic decision > phonol | -10 | 52  | -8  |
|  |                         |    |           |                                      |                            | -14 | 44  | -8  |
|  |                         |    |           |                                      |                            | -20 | 30  | 48  |
|  |                         |    |           |                                      |                            | -42 | -66 | 28  |
|  |                         |    |           |                                      |                            | -4  | -56 | 28  |
|  | Fletcher et al., 1995   | 6  | Sentences | Semantic decision                    | Story > unrelated Sent     | -12 | 50  | 35  |
|  |                         |    |           |                                      |                            | -47 | 21  | -24 |
|  |                         |    |           |                                      |                            | 48  | 19  | -25 |
|  |                         |    |           |                                      |                            | 6   | -65 | 15  |
|  |                         |    |           |                                      |                            | -46 | -58 | 24  |
|  | Fliessbach et al., 2006 | 21 | Words     | Recognition                          | Concrete > Abstract        | -36 | -77 | 40  |
|  |                         |    |           |                                      |                            | -50 | -65 | 39  |

|  |                        |    |       |                                      |                               |     |     |     |
|--|------------------------|----|-------|--------------------------------------|-------------------------------|-----|-----|-----|
|  |                        |    |       |                                      |                               | 45  | -69 | 39  |
|  | Gesierich et al., 2012 | 21 | Faces | Same/different identity              | Familiar faces > unfamiliar f | -3  | -54 | 12  |
|  |                        |    |       |                                      |                               | -12 | 6   | 6   |
|  |                        |    |       |                                      |                               | -9  | -6  | 6   |
|  |                        |    |       |                                      |                               | -3  | -36 | 30  |
|  |                        |    |       |                                      |                               | -39 | 27  | 6   |
|  |                        |    |       |                                      |                               | 18  | 21  | -3  |
|  |                        |    |       |                                      |                               | -36 | 33  | -12 |
|  |                        |    |       |                                      |                               | -39 | 15  | -33 |
|  |                        |    |       |                                      |                               | -33 | -72 | 39  |
|  |                        |    |       |                                      |                               | -60 | -6  | -18 |
|  |                        |    |       |                                      |                               | 60  | -3  | -15 |
|  |                        |    |       |                                      |                               | -3  | 60  | -9  |
|  |                        |    |       |                                      |                               | 45  | -66 | 30  |
|  |                        |    |       |                                      |                               | -21 | 57  | 0   |
|  |                        |    |       |                                      |                               | -54 | -39 | -6  |
|  |                        |    |       |                                      |                               | 18  | -45 | -9  |
|  |                        |    |       |                                      |                               | 36  | -12 | -18 |
|  |                        |    |       |                                      |                               | 48  | 6   | -27 |
|  | Gitelman et al., 2005  | 14 | Words | Semantic decision vs. phonological d | Semantic decision > phonol    | -15 | -36 | 66  |
|  |                        |    |       |                                      |                               | -12 | 30  | 42  |
|  |                        |    |       |                                      |                               | -24 | 12  | 39  |
|  |                        |    |       |                                      |                               | -24 | 21  | 36  |
|  |                        |    |       |                                      |                               | -51 | 27  | -3  |
|  |                        |    |       |                                      |                               | -48 | 15  | 9   |
|  |                        |    |       |                                      |                               | -54 | 27  | 24  |
|  |                        |    |       |                                      |                               | -9  | 15  | 60  |
|  |                        |    |       |                                      |                               | -39 | -54 | 24  |
|  |                        |    |       |                                      |                               | -48 | 12  | -15 |
|  |                        |    |       |                                      |                               | -42 | 0   | -42 |
|  |                        |    |       |                                      |                               | -57 | -45 | 3   |
|  |                        |    |       |                                      |                               | 48  | -15 | -18 |
|  |                        |    |       |                                      |                               | 51  | -9  | -9  |
|  |                        |    |       |                                      |                               | -51 | -15 | -9  |
|  |                        |    |       |                                      |                               | 24  | -72 | -3  |
|  |                        |    |       |                                      |                               | 15  | -87 | 21  |
|  |                        |    |       |                                      |                               | -15 | -45 | -36 |
|  |                        |    |       |                                      |                               | 6   | -54 | -33 |

|  |                         |    |             |                                        |                                    |     |     |     |
|--|-------------------------|----|-------------|----------------------------------------|------------------------------------|-----|-----|-----|
|  |                         |    |             |                                        |                                    | 27  | -78 | -42 |
|  | Gourovitch et al., 2000 | 18 | Words       | Semantic generation vs. phonological   | Semantic generation > phonological | -1  | 69  | 2   |
|  |                         |    |             |                                        |                                    | -25 | -15 | -21 |
|  |                         |    |             |                                        |                                    | -1  | 35  | -17 |
|  |                         |    |             |                                        |                                    | -8  | 35  | -17 |
|  |                         |    |             |                                        |                                    | -57 | -24 | -24 |
|  |                         |    |             |                                        |                                    | 47  | -65 | 15  |
|  | Graves et al., 2010     | 20 | Words       | Reading aloud                          | Word frequency (positive)          | 1   | -55 | 25  |
|  |                         |    |             |                                        |                                    | -6  | -29 | 40  |
|  |                         |    |             |                                        |                                    | 45  | -63 | 39  |
|  |                         |    |             |                                        |                                    | 41  | -29 | 27  |
|  |                         |    |             |                                        |                                    | -36 | -80 | 25  |
|  |                         |    |             |                                        |                                    | -62 | -41 | 31  |
|  |                         |    |             |                                        |                                    | -30 | 22  | 43  |
|  | Homae et al., 2003      | 10 | Sentences   | Semantic decision vs. lexical decision | Story > unrelated sentences        | -45 | 42  | 3   |
|  |                         |    |             |                                        |                                    | 51  | 36  | -3  |
|  |                         |    |             |                                        |                                    | 48  | 36  | 15  |
|  |                         |    |             |                                        |                                    | -24 | 18  | 48  |
|  |                         |    |             |                                        |                                    | 30  | 18  | 48  |
|  |                         |    |             |                                        |                                    | -39 | 57  | -6  |
|  |                         |    |             |                                        |                                    | -51 | -36 | -6  |
|  |                         |    |             |                                        |                                    | -54 | -54 | 27  |
|  |                         |    |             |                                        |                                    | 51  | -48 | 24  |
|  |                         |    |             |                                        |                                    | 36  | -72 | 39  |
|  |                         |    |             |                                        |                                    | -6  | -63 | 39  |
|  | Jessen et al., 2000     | 14 | Words       | Memorise                               | Concrete > Abstract                | -40 | -68 | 43  |
|  |                         |    |             |                                        |                                    | -44 | 47  | 2   |
|  |                         |    |             |                                        |                                    | 47  | -61 | 48  |
|  |                         |    |             |                                        |                                    | -1  | -55 | 51  |
|  | Kosslyn et al., 1995    | 12 | Picture and | Semantic decision                      | Category > Other                   | -52 | -61 | -7  |
|  |                         |    |             |                                        |                                    | -28 | -56 | -8  |
|  |                         |    |             |                                        |                                    | 41  | -74 | 24  |
|  |                         |    |             |                                        |                                    | 61  | -58 | -4  |
|  | Kotz et al., 2002       | 13 | Words       | Lexical decision                       | Related > unrelated                | -46 | -57 | 34  |
|  |                         |    |             |                                        |                                    | -59 | -34 | 39  |
|  |                         |    |             |                                        |                                    | -17 | -86 | 30  |
|  | Kuperberg et al., 2000  | 9  | Sentences   | Semantic decision                      | High meaning > Low meaning         | -42 | -44 | -7  |
|  |                         |    |             |                                        |                                    | -33 | -45 | 10  |

|  |                       |    |           |                          |                             |     |     |     |
|--|-----------------------|----|-----------|--------------------------|-----------------------------|-----|-----|-----|
|  |                       |    |           |                          |                             | 51  | -25 | 1   |
|  |                       |    |           |                          |                             | -45 | -53 | 24  |
|  |                       |    |           |                          |                             | 39  | 13  | -9  |
|  |                       |    |           |                          |                             | -20 | -82 | -4  |
|  |                       |    |           |                          |                             | -11 | -53 | 23  |
|  |                       |    |           |                          |                             | 22  | 18  | -21 |
|  |                       |    |           |                          |                             | -2  | -71 | -5  |
|  |                       |    |           |                          |                             | -12 | -73 | -12 |
|  |                       |    |           |                          |                             | -6  | 19  | -9  |
|  | Luo et al., 2002      | 12 | Words     | Semantic decision        | Related > unrelated         | -37 | -78 | 40  |
|  |                       |    |           |                          |                             | -39 | -73 | 47  |
|  |                       |    |           |                          |                             | 43  | -74 | 37  |
|  |                       |    |           |                          |                             | -5  | -53 | 10  |
|  |                       |    |           |                          |                             | 8   | -53 | 9   |
|  |                       |    |           |                          |                             | -21 | -34 | -14 |
|  |                       |    |           |                          |                             | 23  | -31 | -13 |
|  |                       |    |           |                          |                             | -53 | 13  | 3   |
|  |                       |    |           |                          |                             | -31 | 38  | 46  |
|  |                       |    |           |                          |                             | -50 | -70 | 26  |
|  | Mashal et al., 2007   | 15 | Words     | Semantic decision        | Related > unrelated         | -33 | -69 | 47  |
|  |                       |    |           |                          |                             | -41 | -45 | 47  |
|  |                       |    |           |                          |                             | 44  | 58  | 10  |
|  |                       |    |           |                          |                             | -38 | 51  | 15  |
|  |                       |    |           |                          |                             | 41  | 22  | 2   |
|  |                       |    |           |                          |                             | 61  | -41 | -3  |
|  |                       |    |           |                          |                             | -55 | -49 | 0   |
|  |                       |    |           |                          |                             | -4  | -10 | 3   |
|  |                       |    |           |                          |                             | 57  | 19  | 4   |
|  |                       |    |           |                          |                             | -48 | 13  | 18  |
|  |                       |    |           |                          |                             | -47 | 40  | 1   |
|  |                       |    |           |                          |                             | -36 | 16  | 1   |
|  | Mechelli et al., 2007 | 20 | Words/pic | Reading aloud and naming | Semantically related > unre | -66 | -38 | -8  |
|  |                       |    |           |                          |                             | -56 | -24 | -10 |
|  |                       |    |           |                          |                             | -32 | -72 | 44  |
|  |                       |    |           |                          |                             | -58 | -52 | 40  |
|  |                       |    |           |                          |                             | 2   | 30  | 40  |
|  |                       |    |           |                          |                             | -6  | 18  | 44  |
|  |                       |    |           |                          |                             | -46 | 24  | -14 |

|  |                       |    |           |                                      |                             |     |     |     |
|--|-----------------------|----|-----------|--------------------------------------|-----------------------------|-----|-----|-----|
|  |                       |    |           |                                      |                             | -52 | 38  | -6  |
|  | Mummary et al., 1998  | 10 | Words     | Semantic decision vs. phonological d | Semantic decision > phonol  | -48 | -72 | 35  |
|  |                       |    |           |                                      |                             | -59 | -25 | -8  |
|  |                       |    |           |                                      |                             | -31 | -32 | -19 |
|  |                       |    |           |                                      |                             | -47 | -24 | -19 |
|  |                       |    |           |                                      |                             | -5  | 66  | 18  |
|  |                       |    |           |                                      |                             | -14 | 58  | -15 |
|  | Nichelli et al., 1995 | 9  | Sentences | Semantic decision vs. orthographic d | Semantic decision > orthogr | -31 | -58 | 47  |
|  |                       |    |           |                                      |                             | -22 | 25  | 43  |
|  |                       |    |           |                                      |                             | 9   | 56  | -19 |
|  | Price et al., 1997    | 6  | Words     | Semantic decision vs. phonological d | Semantic decision > phonol  | -34 | -5  | -26 |
|  |                       |    |           |                                      |                             | -52 | -69 | 21  |
|  | Raposo et al., 2006   | 15 | Words     | Semantic decision                    | Related > unrelated         | 44  | 25  | 30  |
|  |                       |    |           |                                      |                             | 38  | 21  | 39  |
|  |                       |    |           |                                      |                             | 44  | 13  | 31  |
|  |                       |    |           |                                      |                             | 59  | -41 | 2   |
|  |                       |    |           |                                      |                             | 61  | -33 | -2  |
|  |                       |    |           |                                      |                             | 55  | -47 | 34  |
|  |                       |    |           |                                      |                             | 6   | 37  | 37  |
|  |                       |    |           |                                      |                             | 0   | 46  | 31  |
|  |                       |    |           |                                      |                             | -6  | 40  | 27  |
|  |                       |    |           |                                      |                             | 51  | 33  | 9   |
|  |                       |    |           |                                      |                             | 48  | 19  | -8  |
|  |                       |    |           |                                      |                             | 44  | 21  | -1  |
|  |                       |    |           |                                      |                             | -42 | 23  | 26  |
|  |                       |    |           |                                      |                             | -36 | 13  | 23  |
|  |                       |    |           |                                      |                             | -44 | 23  | 36  |
|  |                       |    |           |                                      |                             | -48 | -29 | -5  |
|  |                       |    |           |                                      |                             | -63 | -39 | 4   |
|  |                       |    |           |                                      |                             | -51 | -12 | -8  |
|  | Roskies et al., 2001  | 20 | Words     | Semantic decision vs. phonological d | Semantic decision > phonol  | 0   | -27 | -22 |
|  |                       |    |           |                                      |                             | -11 | 69  | -9  |
|  |                       |    |           |                                      |                             | -13 | 55  | 24  |
|  |                       |    |           |                                      |                             | -23 | 26  | 36  |
|  |                       |    |           |                                      |                             | -26 | 3   | 29  |
|  |                       |    |           |                                      |                             | -26 | -21 | -2  |
|  |                       |    |           |                                      |                             | -37 | 26  | -31 |
|  |                       |    |           |                                      |                             | -39 | 25  | -20 |

|  |                        |    |       |                   |                     |     |     |     |
|--|------------------------|----|-------|-------------------|---------------------|-----|-----|-----|
|  |                        |    |       |                   |                     | -40 | -58 | 35  |
|  |                        |    |       |                   |                     | -44 | 44  | -17 |
|  |                        |    |       |                   |                     | -52 | -8  | -19 |
|  |                        |    |       |                   |                     | -5  | 43  | -31 |
|  |                        |    |       |                   |                     | -5  | 28  | -32 |
|  |                        |    |       |                   |                     | -54 | 23  | -8  |
|  |                        |    |       |                   |                     | -6  | -58 | 17  |
|  |                        |    |       |                   |                     | 13  | 43  | 11  |
|  |                        |    |       |                   |                     | 17  | -92 | -25 |
|  |                        |    |       |                   |                     | 22  | 20  | 42  |
|  |                        |    |       |                   |                     | 41  | -25 | -25 |
|  |                        |    |       |                   |                     | 58  | 4   | -15 |
|  | Sabsevitz et al., 2005 | 28 | Words | Semantic decision | Concrete > Abstract | -28 | -24 | -24 |
|  |                        |    |       |                   |                     | -26 | -39 | -14 |
|  |                        |    |       |                   |                     | -61 | -52 | -14 |
|  |                        |    |       |                   |                     | -48 | -56 | -15 |
|  |                        |    |       |                   |                     | 24  | -5  | -20 |
|  |                        |    |       |                   |                     | 28  | -15 | -24 |
|  |                        |    |       |                   |                     | 29  | -28 | -20 |
|  |                        |    |       |                   |                     | -28 | -79 | 44  |
|  |                        |    |       |                   |                     | -32 | -66 | 37  |
|  |                        |    |       |                   |                     | -39 | -72 | 49  |
|  |                        |    |       |                   |                     | 41  | -59 | 36  |
|  |                        |    |       |                   |                     | 47  | -69 | 36  |
|  |                        |    |       |                   |                     | 50  | -44 | 46  |
|  |                        |    |       |                   |                     | -23 | 28  | -17 |
|  |                        |    |       |                   |                     | -44 | 44  | 5   |
|  |                        |    |       |                   |                     | -39 | 32  | 14  |
|  |                        |    |       |                   |                     | -19 | 15  | 52  |
|  |                        |    |       |                   |                     | -11 | 19  | -20 |
|  |                        |    |       |                   |                     | 30  | 28  | -16 |
|  |                        |    |       |                   |                     | 41  | 38  | -18 |
|  |                        |    |       |                   |                     | 32  | 17  | 45  |
|  |                        |    |       |                   |                     | 50  | 36  | 7   |
|  |                        |    |       |                   |                     | 47  | 50  | -4  |
|  |                        |    |       |                   |                     | -14 | -54 | 18  |
|  |                        |    |       |                   |                     | 8   | -53 | 11  |
|  |                        |    |       |                   |                     | 3   | -62 | 31  |



|  |                         |    |           |                                       |                              |     |     |     |
|--|-------------------------|----|-----------|---------------------------------------|------------------------------|-----|-----|-----|
|  | Satpute et al., 2005    | 11 | Words     | Semantic decision                     | Causation > Association      | -31 | 46  | 12  |
|  |                         |    |           |                                       |                              | -38 | 54  | 13  |
|  |                         |    |           |                                       |                              | 28  | -60 | 36  |
|  |                         |    |           |                                       |                              | -1  | -24 | -20 |
|  | Scott et al., 2003      | 9  | Words     | Semantic decision (living/non-living) | Semantics decision > syllabl | -3  | 48  | 42  |
|  |                         |    |           |                                       |                              | -49 | 34  | -28 |
|  |                         |    |           |                                       |                              | -39 | 15  | -38 |
|  |                         |    |           |                                       |                              | -59 | -4  | -23 |
|  |                         |    |           |                                       |                              | -36 | -24 | -25 |
|  |                         |    |           |                                       |                              | -63 | -43 | -3  |
|  |                         |    |           |                                       |                              | -53 | -66 | 27  |
|  | Seghier et al., 2010    | 98 | Words/pic | Semantic or perceptual decisions      | Semantics > perceptual dec   | -30 | -66 | 42  |
|  |                         |    |           |                                       |                              | -48 | -68 | 28  |
|  | Stringaris et al., 2008 | 11 | Sentences | Semantic decision                     | High meaning > Low meanir    | -54 | -7  | -11 |
|  |                         |    |           |                                       |                              | -22 | -76 | 20  |
|  |                         |    |           |                                       |                              | 52  | 20  | 15  |
|  |                         |    |           |                                       |                              | 41  | -1  | 42  |
|  | Sugiura et al., 2006    | 24 | Words     | Familiarity judgments                 | Personal names > famous n    | -50 | -70 | 41  |
|  |                         |    |           |                                       |                              | 54  | -72 | 37  |
|  |                         |    |           |                                       |                              | -9  | -66 | 36  |
|  |                         |    |           |                                       |                              | 12  | -64 | 33  |
|  | Wallentin et al., 2005  | 18 | Sentences | Semantic decision                     | Concrete > Abstract          | -32 | -44 | -20 |
|  |                         |    |           |                                       |                              | 30  | -38 | -24 |
|  |                         |    |           |                                       |                              | -16 | -64 | 8   |
|  |                         |    |           |                                       |                              | 14  | -58 | 4   |
|  |                         |    |           |                                       |                              | 42  | -80 | 18  |
|  |                         |    |           |                                       |                              | -40 | -82 | 16  |
|  |                         |    |           |                                       |                              | -4  | -40 | 40  |
|  |                         |    |           |                                       |                              | -24 | -74 | 38  |
|  |                         |    |           |                                       |                              | -32 | 28  | 44  |
|  |                         |    |           |                                       |                              | 10  | 52  | -12 |
|  | Whitney et al., 2009    | 18 | Words     | Semantic relatedness judgement        | Positive correlation with nu | 4   | 40  | -20 |
|  |                         |    |           |                                       |                              | 8   | 64  | 20  |
|  |                         |    |           |                                       |                              | -8  | 64  | 20  |
|  |                         |    |           |                                       |                              | 0   | 52  | -8  |
|  |                         |    |           |                                       |                              | -20 | 60  | 12  |
|  |                         |    |           |                                       |                              | -4  | 52  | 0   |
|  |                         |    |           |                                       |                              | -20 | 40  | 44  |

|  |                      |    |           |                                       |                             |     |     |     |
|--|----------------------|----|-----------|---------------------------------------|-----------------------------|-----|-----|-----|
|  |                      |    |           |                                       |                             | -44 | 12  | 52  |
|  |                      |    |           |                                       |                             | -44 | -72 | 36  |
|  |                      |    |           |                                       |                             | 48  | -72 | 36  |
|  |                      |    |           |                                       |                             | 48  | -72 | 28  |
|  |                      |    |           |                                       |                             | -60 | -16 | -24 |
|  |                      |    |           |                                       |                             | -8  | -48 | 36  |
|  |                      |    |           |                                       |                             | -4  | -68 | 36  |
|  |                      |    |           |                                       |                             | -40 | 8   | 28  |
|  |                      |    |           |                                       |                             | -36 | 20  | 28  |
|  |                      |    |           |                                       |                             | -8  | 16  | 48  |
|  |                      |    |           |                                       |                             | -4  | 12  | 52  |
|  | Wirth et al., 2011   | 21 | Words     | Living/non-living, syllable judgement | Semantic > phonological de  | -48 | 17  | -28 |
|  |                      |    |           |                                       |                             | -53 | -20 | -11 |
|  |                      |    |           |                                       |                             | -57 | -68 | 21  |
|  |                      |    |           |                                       |                             | 27  | -86 | -32 |
|  |                      |    |           |                                       |                             | -5  | 38  | 53  |
|  |                      |    |           |                                       |                             | -2  | 38  | -11 |
|  |                      |    |           |                                       |                             | -2  | -56 | 12  |
|  | Woodard et al., 2007 | 15 | Words     | Familiarity judgments                 | Familiar names > unfamiliar | -1  | -51 | 22  |
|  |                      |    |           |                                       |                             | 2   | 49  | -8  |
|  |                      |    |           |                                       |                             | -18 | 36  | 38  |
|  |                      |    |           |                                       |                             | -49 | 25  | -5  |
|  |                      |    |           |                                       |                             | 27  | 26  | 38  |
|  |                      |    |           |                                       |                             | -57 | -14 | -17 |
|  |                      |    |           |                                       |                             | -46 | -69 | 29  |
|  |                      |    |           |                                       |                             | -60 | -41 | -6  |
|  |                      |    |           |                                       |                             | 53  | -62 | 14  |
|  |                      |    |           |                                       |                             | 29  | -43 | -22 |
|  |                      |    |           |                                       |                             | 27  | -21 | -16 |
|  |                      |    |           |                                       |                             | 16  | 8   | 16  |
|  |                      |    |           |                                       |                             | -10 | -48 | 52  |
|  | Xu et al., 2005      | 22 | Sentences | Memorise                              | Story > unrelated sentences | -44 | 34  | -8  |
|  |                      |    |           |                                       |                             | 52  | 30  | -8  |
|  |                      |    |           |                                       |                             | -54 | -10 | -24 |
|  |                      |    |           |                                       |                             | 56  | -8  | -28 |
|  |                      |    |           |                                       |                             | -58 | -60 | 10  |
|  |                      |    |           |                                       |                             | 60  | -58 | 14  |
|  |                      |    |           |                                       |                             | -52 | -72 | 28  |

|                            |                        |    |         |                |                               |     |     |     |
|----------------------------|------------------------|----|---------|----------------|-------------------------------|-----|-----|-----|
| <b>Bottom-up attention</b> | Arrington et al., 2000 | 12 | Symbols | Posner cueing  | Invalid > valid trials        | 52  | -62 | 30  |
|                            |                        |    |         |                |                               | 51  | -29 | -9  |
|                            |                        |    |         |                |                               | 13  | 54  | 19  |
|                            |                        |    |         |                |                               | 3   | 23  | 54  |
|                            |                        |    |         |                |                               | 49  | 17  | 35  |
|                            |                        |    |         |                |                               | 46  | 25  | -9  |
|                            | Bledowski et al., 2004 | 13 | Shapes  | Oddball        | Relevant target > baseline    | -56 | 0   | 24  |
|                            |                        |    |         |                |                               | -38 | 5   | 8   |
|                            |                        |    |         |                |                               | -48 | -19 | 13  |
|                            |                        |    |         |                |                               | -39 | -25 | 53  |
|                            |                        |    |         |                |                               | -51 | -29 | 35  |
|                            |                        |    |         |                |                               | -47 | -40 | 46  |
|                            |                        |    |         |                |                               | 35  | 38  | 29  |
|                            |                        |    |         |                |                               | 7   | -75 | 34  |
|                            |                        |    |         |                |                               | 55  | -42 | 12  |
|                            |                        |    |         |                |                               | 39  | 7   | 9   |
|                            |                        |    |         |                |                               | 44  | 12  | 24  |
|                            |                        |    |         |                |                               | 36  | 36  | 30  |
|                            |                        |    |         |                |                               | 42  | 14  | 36  |
|                            |                        |    |         |                |                               | 43  | -2  | 38  |
|                            |                        |    |         |                |                               | 2   | 12  | 40  |
|                            |                        |    |         |                |                               | 1   | 0   | 52  |
|                            |                        |    |         |                |                               | 44  | -46 | 42  |
|                            | Braver et al., 2001    | 14 | Letters | oddball        | Oddball                       | 4   | 4   | 59  |
|                            |                        |    |         |                |                               | 0   | 0   | 46  |
|                            |                        |    |         |                |                               | -36 | -25 | 56  |
|                            |                        |    |         |                |                               | -50 | -4  | 3   |
|                            |                        |    |         |                |                               | -56 | -25 | 26  |
|                            |                        |    |         |                |                               | -37 | -77 | -13 |
|                            |                        |    |         |                |                               | 35  | -58 | -47 |
|                            | Cabeza et al., 2003    | 20 | Letters | Blip detection | Visual attention > episodic r | -35 | -25 | 58  |
|                            |                        |    |         |                |                               | -43 | 9   | -9  |
|                            |                        |    |         |                |                               | -48 | 1   | -4  |
|                            |                        |    |         |                |                               | 45  | 6   | -6  |
|                            |                        |    |         |                |                               | 61  | -2  | -1  |
|                            |                        |    |         |                |                               | -52 | 1   | -4  |
|                            |                        |    |         |                |                               | 61  | -56 | -1  |
|                            |                        |    |         |                |                               | -52 | -75 | 12  |

|  |                       |    |         |               |                   |     |      |     |
|--|-----------------------|----|---------|---------------|-------------------|-----|------|-----|
|  |                       |    |         |               |                   | 46  | -78  | 18  |
|  |                       |    |         |               |                   | -15 | -100 | 7   |
|  |                       |    |         |               |                   | 42  | -85  | -2  |
|  |                       |    |         |               |                   | 58  | -30  | 23  |
|  |                       |    |         |               |                   | -67 | -26  | 27  |
|  |                       |    |         |               |                   | 34  | -44  | 60  |
|  |                       |    |         |               |                   | 29  | 56   | 14  |
|  |                       |    |         |               |                   | 50  | 41   | -7  |
|  |                       |    |         |               |                   | 54  | 2    | 2   |
|  |                       |    |         |               |                   | 55  | 13   | 44  |
|  |                       |    |         |               |                   | 61  | 11   | 4   |
|  |                       |    |         |               |                   | 10  | 2    | 58  |
|  |                       |    |         |               |                   | -63 | 8    | 11  |
|  |                       |    |         |               |                   | -7  | -26  | 54  |
|  |                       |    |         |               |                   | -19 | -41  | 64  |
|  | Chen et al., 2012     | 20 | Spatial | Posner cueing | Invalid > valid   | 52  | -42  | 15  |
|  |                       |    |         |               |                   | -26 | -68  | 25  |
|  |                       |    |         |               |                   | 30  | -74  | 31  |
|  |                       |    |         |               |                   | -18 | -68  | 59  |
|  |                       |    |         |               |                   | 18  | -62  | 55  |
|  |                       |    |         |               |                   | 36  | -48  | 53  |
|  |                       |    |         |               |                   | 30  | -6   | 53  |
|  |                       |    |         |               |                   | 4   | -56  | 53  |
|  |                       |    |         |               |                   | -50 | -66  | 3   |
|  | Clark et al., 2000    | 6  | Letters | Oddball       | Oddball           | 0   | -10  | 9   |
|  |                       |    |         |               |                   | 0   | -79  | 5   |
|  |                       |    |         |               |                   | -40 | -64  | -15 |
|  |                       |    |         |               |                   | 32  | -55  | -15 |
|  |                       |    |         |               |                   | -64 | -44  | 24  |
|  |                       |    |         |               |                   | -49 | -19  | 57  |
|  |                       |    |         |               |                   | 54  | -36  | 41  |
|  |                       |    |         |               |                   | 36  | 7    | 57  |
|  |                       |    |         |               |                   | -2  | 17   | 45  |
|  |                       |    |         |               |                   | -48 | 14   | 0   |
|  |                       |    |         |               |                   | -68 | 23   | 11  |
|  |                       |    |         |               |                   | 49  | 20   | -1  |
|  | Corbetta et al., 2000 | 13 | Shapes  | Posner cueing | Target > baseline | -25 | -63  | 56  |
|  |                       |    |         |               |                   | -25 | -55  | 48  |

|  |                       |    |            |               |                                    |     |     |     |
|--|-----------------------|----|------------|---------------|------------------------------------|-----|-----|-----|
|  |                       |    |            |               |                                    | -28 | -78 | 26  |
|  |                       |    |            |               |                                    | 38  | -48 | 53  |
|  |                       |    |            |               |                                    | 31  | -71 | 36  |
|  |                       |    |            |               |                                    | 59  | -44 | 21  |
|  |                       |    |            |               |                                    | 9   | -73 | 38  |
|  |                       |    |            |               |                                    | -8  | -70 | 47  |
|  | Doricchi et al., 2010 | 24 | Symbols    | Posner cueing | Invalid > valid > neutral          | 23  | 18  | 54  |
|  |                       |    |            |               |                                    | 45  | 10  | 43  |
|  |                       |    |            |               |                                    | 47  | 18  | 27  |
|  |                       |    |            |               |                                    | 66  | -44 | 30  |
|  |                       |    |            |               |                                    | 15  | -53 | 54  |
|  |                       |    |            |               |                                    | 39  | -39 | 46  |
|  | Downar et al., 2001   | 10 | Shapes and | Oddball       | Relevant > irrelevant              | 64  | -43 | 17  |
|  |                       |    |            |               |                                    | -64 | -48 | 20  |
|  |                       |    |            |               |                                    | -2  | 29  | 35  |
|  |                       |    |            |               |                                    | -38 | 22  | 3   |
|  |                       |    |            |               |                                    | 0   | -55 | 45  |
|  |                       |    |            |               |                                    | 8   | -13 | 8   |
|  |                       |    |            |               |                                    | -49 | -1  | 48  |
|  |                       |    |            |               |                                    | -33 | -10 | 68  |
|  |                       |    |            |               |                                    | 38  | -67 | -38 |
|  | Downar et al., 2002   | 10 | Shapes, to | Oddball       | Rare event > frequent event        | 62  | -34 | 25  |
|  |                       |    |            |               |                                    | 61  | -54 | 4   |
|  |                       |    |            |               |                                    | 47  | 4   | 19  |
|  |                       |    |            |               |                                    | 59  | 14  | 22  |
|  |                       |    |            |               |                                    | 48  | 16  | -2  |
|  |                       |    |            |               |                                    | -6  | 15  | 28  |
|  |                       |    |            |               |                                    | -50 | -50 | -26 |
|  | Geng et al., 2009     | 15 | Spatial    | Posner cueing | Salient distractor > not > salient | -32 | -44 | 45  |
|  |                       |    |            |               |                                    | 36  | -43 | 43  |
|  | Gruber et al., 2009   | 12 | Colour     | Oddball       | Oddball                            | -46 | 12  | 22  |
|  |                       |    |            |               |                                    | -38 | 33  | 11  |
|  |                       |    |            |               |                                    | 62  | 33  | 5   |
|  |                       |    |            |               |                                    | -37 | -58 | 47  |
|  |                       |    |            |               |                                    | 41  | -63 | 41  |
|  |                       |    |            |               |                                    | -47 | -56 | -16 |
|  |                       |    |            |               |                                    | 10  | 23  | 47  |
|  |                       |    |            |               |                                    | -24 | 19  | 48  |

|  |                       |    |           |               |                               |     |     |     |
|--|-----------------------|----|-----------|---------------|-------------------------------|-----|-----|-----|
|  | Hahn et al., 2007     | 22 | Targets   | Posner cueing | Uncued trials: positive corre | 3   | 46  | 5   |
|  |                       |    |           |               |                               | 2   | -42 | 32  |
|  |                       |    |           |               |                               | -49 | -65 | 37  |
|  | Indovina et al., 2007 | 12 | Spatial   | Posner cueing | Invalid > valid               | -30 | -58 | 44  |
|  |                       |    |           |               |                               | 34  | -68 | 38  |
|  |                       |    |           |               |                               | -42 | 6   | 32  |
|  |                       |    |           |               |                               | 48  | 14  | 26  |
|  |                       |    |           |               |                               | -8  | -74 | 42  |
|  |                       |    |           |               |                               | 8   | -60 | 52  |
|  |                       |    |           |               |                               | -32 | 24  | -8  |
|  |                       |    |           |               |                               | 34  | 26  | -4  |
|  |                       |    |           |               |                               | 8   | 20  | 40  |
|  |                       |    |           |               |                               | -6  | 18  | 46  |
|  |                       |    |           |               |                               | -30 | 4   | 54  |
|  |                       |    |           |               |                               | 26  | 4   | 46  |
|  | Kiehl et al., 2001    | 10 | Non-verba | Oddball       | Relevant > irrelevant         | 31  | 59  | -11 |
|  |                       |    |           |               |                               | 29  | 57  | -11 |
|  |                       |    |           |               |                               | -43 | 48  | 25  |
|  |                       |    |           |               |                               | 26  | 9   | 73  |
|  |                       |    |           |               |                               | 30  | 3   | 51  |
|  |                       |    |           |               |                               | -63 | 8   | 24  |
|  |                       |    |           |               |                               | 2   | 3   | 57  |
|  |                       |    |           |               |                               | 2   | 18  | 44  |
|  |                       |    |           |               |                               | 10  | 32  | 20  |
|  |                       |    |           |               |                               | -51 | 5   | -10 |
|  |                       |    |           |               |                               | 54  | 5   | -12 |
|  |                       |    |           |               |                               | -37 | -9  | 64  |
|  |                       |    |           |               |                               | -35 | -23 | 77  |
|  |                       |    |           |               |                               | 67  | -21 | 47  |
|  |                       |    |           |               |                               | -26 | -39 | 78  |
|  |                       |    |           |               |                               | 24  | -44 | 78  |
|  |                       |    |           |               |                               | -54 | -39 | 39  |
|  |                       |    |           |               |                               | 55  | -21 | 47  |
|  |                       |    |           |               |                               | -14 | -65 | 69  |
|  |                       |    |           |               |                               | 14  | -47 | 78  |
|  |                       |    |           |               |                               | 2   | -31 | 38  |
|  |                       |    |           |               |                               | -60 | 9   | -16 |
|  |                       |    |           |               |                               | 61  | 20  | -30 |



|  |                         |    |         |               |                               |     |     |     |
|--|-------------------------|----|---------|---------------|-------------------------------|-----|-----|-----|
|  |                         |    |         |               |                               | 36  | 16  | 26  |
|  | Serences et al., 2005   | 12 | Letters | Visual search | Relevant distractors > irrele | 61  | -43 | 25  |
|  |                         |    |         |               |                               | 50  | 11  | 30  |
|  |                         |    |         |               |                               | 30  | 4   | 47  |
|  |                         |    |         |               |                               | 39  | 24  | -2  |
|  |                         |    |         |               |                               | 25  | 22  | 8   |
|  |                         |    |         |               |                               | 18  | -68 | 48  |
|  |                         |    |         |               |                               | 25  | -58 | 33  |
|  |                         |    |         |               |                               | 6   | 17  | 47  |
|  |                         |    |         |               |                               | -58 | -41 | 19  |
|  |                         |    |         |               |                               | -27 | 20  | 14  |
|  |                         |    |         |               |                               | -20 | -58 | 47  |
|  |                         |    |         |               |                               | -26 | -72 | 25  |
|  |                         |    |         |               |                               | -22 | 3   | 50  |
|  | Strange and Dolan, 2007 | 12 | Words   | oddball       | Oddball                       | -48 | -56 | 34  |
|  | Vossel et al., 2006     | 13 | Spatial | Posner cueing | Invalid > valid               | 51  | 24  | 33  |
|  |                         |    |         |               |                               | 60  | -9  | 15  |
|  |                         |    |         |               |                               | 63  | -27 | -9  |
|  |                         |    |         |               |                               | 57  | -57 | 15  |
|  |                         |    |         |               |                               | 54  | -45 | 45  |
|  |                         |    |         |               |                               | -42 | -54 | 57  |
|  |                         |    |         |               |                               | 33  | 3   | -21 |
|  | Vossel et al., 2008     | 24 | Shapes  | Posner cueing | Invalid > valid and deviant > | 66  | -40 | 9   |
|  |                         |    |         |               |                               | -58 | -54 | 13  |
|  |                         |    |         |               |                               | 44  | -62 | 13  |
|  |                         |    |         |               |                               | 20  | -72 | 59  |
|  |                         |    |         |               |                               | 50  | 36  | 17  |
|  |                         |    |         |               |                               | 36  | 20  | -7  |
|  |                         |    |         |               |                               | -42 | -36 | 53  |
|  |                         |    |         |               |                               | -50 | -62 | -15 |
|  |                         |    |         |               |                               | 50  | -58 | -17 |
|  |                         |    |         |               |                               | -30 | -36 | -27 |
|  |                         |    |         |               |                               | 54  | 12  | 41  |
|  |                         |    |         |               |                               | 32  | -66 | 51  |
|  | Vossel et al., 2012     | 26 | Spatial | Posner cueing | Invalid > valid               | 59  | -60 | 17  |
|  |                         |    |         |               |                               | -51 | 11  | 31  |
|  |                         |    |         |               |                               | 34  | 5   | 44  |
|  |                         |    |         |               |                               | -29 | -62 | 57  |



|                    |                         |    |           |                                       |                               |     |     |     |
|--------------------|-------------------------|----|-----------|---------------------------------------|-------------------------------|-----|-----|-----|
|                    |                         |    |           |                                       |                               | 39  | -54 | 56  |
| Episodic retrieval | Cabeza et al., 2003     | 20 | Words     | Remember, know, or new rating         | Episodic retrieval > visual a | -20 | 70  | 1   |
|                    |                         |    |           |                                       |                               | -48 | 46  | -15 |
|                    |                         |    |           |                                       |                               | -52 | 35  | 11  |
|                    |                         |    |           |                                       |                               | -52 | 22  | 29  |
|                    |                         |    |           |                                       |                               | -47 | 30  | 22  |
|                    |                         |    |           |                                       |                               | -51 | -54 | 48  |
|                    |                         |    |           |                                       |                               | -43 | -71 | 38  |
|                    |                         |    |           |                                       |                               | -72 | 31  | 1   |
|                    |                         |    |           |                                       |                               | -58 | -42 | -5  |
|                    |                         |    |           |                                       |                               | -3  | 39  | 36  |
|                    |                         |    |           |                                       |                               | 2   | -28 | 35  |
|                    |                         |    |           |                                       |                               | -72 | 29  | 2   |
|                    |                         |    |           |                                       |                               | -71 | 39  | 1   |
|                    |                         |    |           |                                       |                               | -3  | -92 | 25  |
|                    |                         |    |           |                                       |                               | -15 | -41 | 2   |
|                    |                         |    |           |                                       |                               | -30 | -12 | 69  |
|                    | Cabeza et al., 2011     | 18 | Words and | Episodic recall and perceptual target | Detection (memory and per     | -62 | -26 | 28  |
|                    |                         |    |           |                                       |                               | 46  | -49 | 53  |
|                    | Cansino et al., 2002    | 22 | Pictures  | Source localise or new                | source correct > source incor | -20 | 51  | 44  |
|                    |                         |    |           |                                       |                               | -3  | 40  | 61  |
|                    |                         |    |           |                                       |                               | -40 | 7   | 16  |
|                    |                         |    |           |                                       |                               | 58  | 1   | 55  |
|                    |                         |    |           |                                       |                               | -50 | 3   | 57  |
|                    |                         |    |           |                                       |                               | -39 | -3  | 64  |
|                    |                         |    |           |                                       |                               | 2   | -30 | 68  |
|                    |                         |    |           |                                       |                               | -46 | -40 | 36  |
|                    |                         |    |           |                                       |                               | -61 | -56 | 6   |
|                    |                         |    |           |                                       |                               | -44 | -54 | 4   |
|                    |                         |    |           |                                       |                               | 55  | -73 | 2   |
|                    |                         |    |           |                                       |                               | 31  | -78 | -9  |
|                    |                         |    |           |                                       |                               | 42  | -49 | -14 |
|                    |                         |    |           |                                       |                               | -40 | -59 | -25 |
|                    |                         |    |           |                                       |                               | -14 | 17  | -19 |
|                    |                         |    |           |                                       |                               | -10 | -60 | -19 |
|                    | Ciaramelli et al., 2010 | 14 | Words     | Old/new cues or no-cues               | Uncued > cued                 | -40 | -66 | 24  |
|                    |                         |    |           |                                       |                               | 20  | -32 | 60  |
|                    |                         |    |           |                                       |                               | -46 | 10  | 26  |

|  |                       |    |       |                                 |                                 |     |     |     |
|--|-----------------------|----|-------|---------------------------------|---------------------------------|-----|-----|-----|
|  |                       |    |       |                                 |                                 | -42 | 44  | 6   |
|  |                       |    |       |                                 |                                 | -26 | 10  | 56  |
|  |                       |    |       |                                 |                                 | 60  | -12 | 12  |
|  |                       |    |       |                                 |                                 | -32 | -80 | 32  |
|  |                       |    |       |                                 |                                 | -34 | -66 | 26  |
|  | Daselaar et al., 2006 | 14 | Words | Old/new (confidence ratings)    | Recollection correlation        | -26 | -26 | -11 |
|  |                       |    |       |                                 |                                 | 30  | -23 | -11 |
|  |                       |    |       |                                 |                                 | -4  | -43 | 20  |
|  |                       |    |       |                                 |                                 | 0   | -23 | 33  |
|  |                       |    |       |                                 |                                 | -45 | -65 | 31  |
|  |                       |    |       |                                 |                                 | -27 | 14  | -20 |
|  |                       |    |       |                                 |                                 | 34  | 17  | -20 |
|  |                       |    |       |                                 |                                 | 0   | -81 | -2  |
|  |                       |    |       |                                 |                                 | -4  | 59  | -3  |
|  |                       |    |       |                                 | Definitely old > definitely new | -26 | -26 | -11 |
|  |                       |    |       |                                 |                                 | 30  | -23 | -11 |
|  |                       |    |       |                                 |                                 | -4  | -43 | 20  |
|  |                       |    |       |                                 |                                 | 0   | -23 | 33  |
|  |                       |    |       |                                 |                                 | -45 | -65 | 31  |
|  |                       |    |       |                                 |                                 | -27 | 14  | -20 |
|  |                       |    |       |                                 |                                 | 34  | 17  | -20 |
|  |                       |    |       |                                 |                                 | 0   | -81 | -2  |
|  |                       |    |       |                                 |                                 | -4  | 59  | -3  |
|  | Eldridge et al., 2000 | 12 | Words | Old/new (remember, know if old) | Remember > know                 | -31 | 40  | 42  |
|  |                       |    |       |                                 |                                 | 16  | -18 | 47  |
|  |                       |    |       |                                 |                                 | 57  | -4  | 40  |
|  |                       |    |       |                                 |                                 | -45 | -54 | 46  |
|  |                       |    |       |                                 |                                 | 59  | -56 | 39  |
|  |                       |    |       |                                 |                                 | 61  | 12  | 21  |
|  |                       |    |       |                                 |                                 | -52 | -40 | 28  |
|  |                       |    |       |                                 |                                 | -46 | -64 | 25  |
|  |                       |    |       |                                 |                                 | 20  | -58 | 18  |
|  |                       |    |       |                                 |                                 | -61 | -39 | 12  |
|  |                       |    |       |                                 |                                 | -12 | 19  | -1  |
|  |                       |    |       |                                 |                                 | -38 | -7  | -3  |
|  |                       |    |       |                                 |                                 | -34 | -24 | -13 |
|  |                       |    |       |                                 |                                 | 24  | -40 | -12 |
|  |                       |    |       |                                 |                                 | 38  | -58 | -16 |

|  |                     |    |             |                        |                 |     |     |     |
|--|---------------------|----|-------------|------------------------|-----------------|-----|-----|-----|
|  | Fan et al., 2003    | 8  | Pictures ar | Source localise or new | Source > new    | 27  | -85 | -19 |
|  |                     |    |             |                        |                 | -36 | 58  | -4  |
|  |                     |    |             |                        |                 | 4   | 52  | 31  |
|  |                     |    |             |                        |                 | -33 | -48 | 43  |
|  |                     |    |             |                        |                 | -50 | 25  | 17  |
|  |                     |    |             |                        |                 | -47 | 21  | -10 |
|  | Fenker et al., 2005 | 20 | Faces and   | Remember, know, new    | Remember > know | 15  | 12  | -21 |
|  |                     |    |             |                        |                 | -27 | 12  | -21 |
|  |                     |    |             |                        |                 | -9  | 42  | 54  |
|  |                     |    |             |                        |                 | -39 | 9   | 60  |
|  |                     |    |             |                        |                 | -33 | 33  | 12  |
|  |                     |    |             |                        |                 | -9  | 54  | -9  |
|  |                     |    |             |                        |                 | 63  | -9  | -21 |
|  |                     |    |             |                        |                 | -57 | -54 | 0   |
|  |                     |    |             |                        |                 | 66  | -42 | -12 |
|  |                     |    |             |                        |                 | 51  | -66 | 21  |
|  |                     |    |             |                        |                 | 33  | -27 | 9   |
|  |                     |    |             |                        |                 | -54 | -15 | -15 |
|  |                     |    |             |                        |                 | -66 | -30 | -12 |
|  |                     |    |             |                        |                 | -57 | -39 | 12  |
|  |                     |    |             |                        |                 | 54  | 3   | 9   |
|  |                     |    |             |                        |                 | 42  | -6  | 42  |
|  |                     |    |             |                        |                 | 69  | -18 | 21  |
|  |                     |    |             |                        |                 | -39 | -69 | 36  |
|  |                     |    |             |                        |                 | -39 | -72 | 51  |
|  |                     |    |             |                        |                 | 6   | -66 | 21  |
|  |                     |    |             |                        |                 | 27  | -93 | 21  |
|  |                     |    |             |                        |                 | 36  | -81 | 24  |
|  |                     |    |             |                        |                 | -24 | -78 | 3   |
|  |                     |    |             |                        |                 | -33 | -93 | 3   |
|  |                     |    |             |                        |                 | -36 | -81 | 15  |
|  |                     |    |             |                        |                 | 6   | -93 | 27  |
|  |                     |    |             |                        |                 | -6  | -96 | 21  |
|  |                     |    |             |                        |                 | 18  | -87 | -24 |
|  |                     |    |             |                        |                 | -21 | -96 | -6  |
|  |                     |    |             |                        |                 | -12 | -6  | -18 |
|  |                     |    |             |                        |                 | 33  | -18 | -12 |
|  |                     |    |             |                        |                 | 33  | 6   | -30 |

|  |                     |    |           |                     |                             |     |      |     |
|--|---------------------|----|-----------|---------------------|-----------------------------|-----|------|-----|
|  |                     |    |           |                     |                             | -33 | -27  | -15 |
|  |                     |    |           |                     |                             | -36 | -18  | -24 |
|  |                     |    |           |                     |                             | 0   | -39  | 39  |
|  |                     |    |           |                     |                             | 24  | -72  | -39 |
|  | Henson et al. 1999  | 12 | Words and | Remember, know, new | Remember > know             | -51 | 42   | -21 |
|  |                     |    |           |                     |                             | -57 | 30   | 30  |
|  |                     |    |           |                     |                             | -64 | 32   | 17  |
|  |                     |    |           |                     |                             | -12 | 70   | 9   |
|  |                     |    |           |                     |                             | -5  | 46   | 21  |
|  |                     |    |           |                     |                             | -34 | -58  | 52  |
|  |                     |    |           |                     |                             | -53 | -43  | 44  |
|  |                     |    |           |                     |                             | -12 | -37  | 3   |
|  |                     |    |           |                     |                             | -5  | -21  | 28  |
|  |                     |    |           |                     |                             | -5  | -40  | 40  |
|  |                     |    |           |                     |                             | -5  | -74  | 50  |
|  |                     |    |           |                     |                             | 2   | -65  | 39  |
|  | Henson et al., 2005 | 22 | Words     | Old, new            | Deep learning > shallow lea | -2  | 67   | 12  |
|  |                     |    |           |                     |                             | 1   | 55   | -13 |
|  |                     |    |           |                     |                             | -5  | 55   | 47  |
|  |                     |    |           |                     |                             | 18  | 51   | 47  |
|  |                     |    |           |                     |                             | 59  | 46   | -14 |
|  |                     |    |           |                     |                             | -45 | 28   | -27 |
|  |                     |    |           |                     |                             | -51 | 31   | 7   |
|  |                     |    |           |                     |                             | 53  | 29   | -22 |
|  |                     |    |           |                     |                             | -45 | 8    | -38 |
|  |                     |    |           |                     |                             | -38 | 20   | -43 |
|  |                     |    |           |                     |                             | 46  | 7    | -46 |
|  |                     |    |           |                     |                             | -35 | -6   | -47 |
|  |                     |    |           |                     |                             | -32 | 2    | -28 |
|  |                     |    |           |                     |                             | -22 | -8   | -37 |
|  |                     |    |           |                     |                             | -15 | -14  | -27 |
|  |                     |    |           |                     |                             | -32 | -33  | -28 |
|  |                     |    |           |                     |                             | 30  | -36  | -25 |
|  |                     |    |           |                     |                             | -64 | -38  | -10 |
|  |                     |    |           |                     |                             | -5  | -50  | 34  |
|  |                     |    |           |                     |                             | -50 | -63  | 33  |
|  |                     |    |           |                     |                             | 15  | -105 | 26  |
|  | Herron et al., 2004 | 12 | Words     | Old, new            | Old > new                   | -11 | -65  | 46  |



|  |                      |    |           |               |                               |     |     |     |
|--|----------------------|----|-----------|---------------|-------------------------------|-----|-----|-----|
|  |                      |    |           |               |                               | -24 | -6  | 21  |
|  |                      |    |           |               |                               | 21  | -3  | 24  |
|  |                      |    |           |               |                               | -15 | -39 | 60  |
|  |                      |    |           |               |                               | 3   | -51 | 21  |
|  |                      |    |           |               |                               | -9  | 57  | -9  |
|  |                      |    |           |               |                               | -6  | -9  | 66  |
|  |                      |    |           |               |                               | 54  | -72 | 18  |
|  |                      |    |           |               |                               | 57  | -3  | -18 |
|  |                      |    |           |               |                               | -27 | -60 | 15  |
|  |                      |    |           |               |                               | 0   | -24 | 15  |
|  |                      |    |           |               |                               | 33  | -93 | -3  |
|  |                      |    |           |               |                               | 45  | -78 | 12  |
|  |                      |    |           |               |                               | 57  | -60 | -18 |
|  |                      |    |           |               |                               | 0   | -66 | -27 |
|  |                      |    |           |               |                               | 36  | -81 | 33  |
|  | Jonides et al., 1998 | 12 | Non-words | Old/new       | Old > new                     | 41  | 58  | -15 |
|  |                      |    |           |               |                               | -54 | 34  | 25  |
|  |                      |    |           |               |                               | 47  | 26  | 17  |
|  |                      |    |           |               |                               | 0   | 16  | 36  |
|  |                      |    |           |               |                               | 0   | 16  | 36  |
|  |                      |    |           |               |                               | 44  | -48 | 48  |
|  |                      |    |           |               |                               | 27  | -94 | -6  |
|  |                      |    |           |               |                               | -25 | -96 | -3  |
|  |                      |    |           |               |                               | -46 | -72 | 24  |
|  |                      |    |           |               |                               | 60  | 3   | -24 |
|  |                      |    |           |               |                               | -56 | -9  | -23 |
|  |                      |    |           |               |                               | 20  | -53 | 20  |
|  |                      |    |           |               |                               | 57  | -63 | 13  |
|  | Kahn et al., 2004    | 17 | Words     | Source or new | Source correct > source incor | 36  | -48 | 42  |
|  | Kao et al., 2005     | 20 | Pictures  | Old, new      | Remember > forgotten          | -22 | -72 | 45  |
|  |                      |    |           |               |                               | 38  | -60 | -15 |
|  |                      |    |           |               |                               | 45  | 6   | 22  |
|  |                      |    |           |               |                               | -45 | -66 | -4  |
|  |                      |    |           |               |                               | 38  | -84 | 15  |
|  |                      |    |           |               |                               | -34 | 30  | -22 |
|  |                      |    |           |               |                               | -41 | 6   | 26  |
|  |                      |    |           |               |                               | 15  | -54 | 15  |
|  |                      |    |           |               |                               | 34  | -48 | 49  |

|  |                        |    |               |                              |                                   |     |     |     |
|--|------------------------|----|---------------|------------------------------|-----------------------------------|-----|-----|-----|
|  | Kensinger et al., 2006 | 17 | Words and     | Old/new                      | Source correct > source incorrect | -33 | 1   | 64  |
|  |                        |    |               |                              |                                   | -34 | 50  | -15 |
|  |                        |    |               |                              |                                   | -44 | 55  | -23 |
|  |                        |    |               |                              |                                   | -28 | 43  | -16 |
|  |                        |    |               |                              |                                   | -50 | -24 | 56  |
|  |                        |    |               |                              |                                   | -36 | -38 | 67  |
|  |                        |    |               |                              |                                   | -50 | -44 | 50  |
|  |                        |    |               |                              |                                   | -36 | -34 | 58  |
|  |                        |    |               |                              |                                   | -25 | -11 | -20 |
|  |                        |    |               |                              |                                   | 24  | 12  | 6   |
|  | Kim and Cabeza, 2007   | 16 | Words         | Old/new (confidence ratings) | High confidence > low confidence  | 27  | -27 | -8  |
|  |                        |    |               |                              |                                   | -27 | -27 | -11 |
|  |                        |    |               |                              |                                   | 27  | 3   | -16 |
|  |                        |    |               |                              |                                   | -8  | 33  | -5  |
|  |                        |    |               |                              |                                   | 15  | 33  | 6   |
|  |                        |    |               |                              |                                   | 15  | -54 | 30  |
|  |                        |    |               |                              |                                   | 4   | 10  | -10 |
|  |                        |    |               |                              |                                   | -46 | -80 | 25  |
|  |                        |    |               |                              |                                   | 23  | -38 | 65  |
|  | Leveroni et al., 2000  | 11 | Faces         | Old, new                     | Newly learned > new               | -5  | 14  | 59  |
|  |                        |    |               |                              |                                   | -38 | -67 | 48  |
|  |                        |    |               |                              |                                   | -4  | -48 | 50  |
|  | Lundstrom et al., 2003 | 21 | Picture-words | Source memory and old/new    | Source memory > new               | -5  | -64 | 35  |
|  |                        |    |               |                              |                                   | -5  | -69 | 43  |
|  |                        |    |               |                              |                                   | -50 | -49 | 50  |
|  |                        |    |               |                              |                                   | 39  | -69 | 46  |
|  |                        |    |               |                              |                                   | -44 | 45  | 5   |
|  |                        |    |               |                              |                                   | -40 | 57  | -5  |
|  |                        |    |               |                              |                                   | -40 | 40  | 21  |
|  |                        |    |               |                              |                                   | -47 | 53  | 0   |
|  |                        |    |               |                              |                                   | -49 | 33  | 15  |
|  |                        |    |               |                              |                                   | -44 | 21  | 0   |
|  |                        |    |               |                              |                                   | -27 | 61  | 10  |
|  | McDermott et al., 2000 | 24 | Words         | Old, new                     | Old > new                         | 46  | -54 | 54  |
|  |                        |    |               |                              |                                   | -38 | -49 | 41  |
|  |                        |    |               |                              |                                   | 40  | -53 | 47  |
|  |                        |    |               |                              |                                   | 50  | 29  | 25  |
|  |                        |    |               |                              |                                   | -62 | -61 | 29  |

|  |                       |    |          |                               |                             |     |     |     |
|--|-----------------------|----|----------|-------------------------------|-----------------------------|-----|-----|-----|
|  |                       |    |          |                               |                             | 52  | -47 | 33  |
|  |                       |    |          |                               |                             | -48 | 41  | 1   |
|  | Montaldi et al., 2006 | 13 | Pictures | Old/new/high fam/low fam      | Recognition > high familiar | -48 | 27  | -15 |
|  |                       |    |          |                               |                             | 42  | 24  | -21 |
|  |                       |    |          |                               |                             | -3  | 48  | 12  |
|  |                       |    |          |                               |                             | -42 | -72 | 30  |
|  |                       |    |          |                               |                             | -12 | -33 | -3  |
|  |                       |    |          |                               |                             | 21  | -33 | -3  |
|  | Moritz et al., 2006   | 17 | Words    | Old/new (confidence ratings)  | High confidence > low confi | -6  | 36  | -6  |
|  |                       |    |          |                               |                             | -3  | -18 | 36  |
|  |                       |    |          |                               |                             | -15 | -51 | -9  |
|  |                       |    |          |                               |                             | 3   | -87 | 27  |
|  |                       |    |          |                               |                             | -27 | -33 | -12 |
|  |                       |    |          |                               |                             | -51 | -66 | 39  |
|  |                       |    |          |                               |                             | -36 | 0   | 15  |
|  | O'Connor et al., 2010 | 19 | Words    | Old/new valid or invalid cues | Invalid > valid cued        | -27 | 18  | -9  |
|  |                       |    |          |                               |                             | -30 | 60  | 3   |
|  |                       |    |          |                               |                             | -39 | 6   | 36  |
|  |                       |    |          |                               |                             | -12 | 36  | 60  |
|  |                       |    |          |                               |                             | -48 | 36  | 24  |
|  |                       |    |          |                               |                             | -45 | 12  | 54  |
|  |                       |    |          |                               |                             | 27  | 60  | 18  |
|  |                       |    |          |                               |                             | -42 | -84 | -9  |
|  |                       |    |          |                               |                             | 39  | -87 | -12 |
|  |                       |    |          |                               |                             | -30 | -96 | 12  |
|  |                       |    |          |                               |                             | 42  | -81 | 6   |
|  |                       |    |          |                               |                             | -42 | -54 | 42  |
|  |                       |    |          |                               |                             | -21 | -78 | 42  |
|  |                       |    |          |                               |                             | 42  | -54 | 39  |
|  |                       |    |          |                               |                             | 63  | -45 | -6  |
|  |                       |    |          |                               |                             | 51  | -51 | 6   |
|  |                       |    |          |                               |                             | 21  | -15 | -12 |
|  |                       |    |          |                               |                             | -12 | -3  | 18  |
|  |                       |    |          |                               |                             | 15  | 6   | -3  |
|  |                       |    |          |                               |                             | -6  | -30 | 27  |
|  |                       |    |          |                               |                             | 12  | 33  | 24  |
|  | Otten and Rugg, 2001  | 15 | Words    | Old, new                      | Subsequently forgotten > su | 2   | -14 | 40  |
|  |                       |    |          |                               |                             | -38 | 46  | 25  |



|  |                           |    |              |                                 |                             |     |     |     |
|--|---------------------------|----|--------------|---------------------------------|-----------------------------|-----|-----|-----|
|  |                           |    |              |                                 |                             | 43  | 47  | 27  |
|  |                           |    |              |                                 |                             | -57 | -52 | 42  |
|  |                           |    |              |                                 |                             | 70  | -43 | 29  |
|  |                           |    |              |                                 |                             | -1  | -75 | 43  |
|  | Shannon and Buckner, 2004 | 72 | Pictures ar  | Old, new                        | Old > new                   | 0   | -72 | 36  |
|  |                           |    |              |                                 |                             | -46 | -59 | 49  |
|  |                           |    |              |                                 |                             | -5  | -56 | 30  |
|  | Tsukiura et al., 2005     | 22 | Words (Ch    | Old, new                        | Old > new                   | -11 | -52 | 46  |
|  |                           |    |              |                                 |                             | -53 | -61 | 39  |
|  |                           |    |              |                                 |                             | -56 | -34 | 43  |
|  |                           |    |              |                                 |                             | -16 | -35 | -10 |
|  |                           |    |              |                                 |                             | 10  | -38 | -3  |
|  | Vilberg and Rugg 2009     | 20 | Pictures of  | Old/new (remember, know if old) | Remember > know             | -36 | 30  | -21 |
|  |                           |    |              |                                 |                             | -27 | 27  | 54  |
|  |                           |    |              |                                 |                             | 39  | -21 | 57  |
|  |                           |    |              |                                 |                             | 21  | -15 | -36 |
|  |                           |    |              |                                 |                             | -24 | -24 | -30 |
|  |                           |    |              |                                 |                             | 24  | -27 | -30 |
|  |                           |    |              |                                 |                             | -63 | -51 | -12 |
|  |                           |    |              |                                 |                             | -6  | -54 | 18  |
|  |                           |    |              |                                 |                             | -51 | -75 | 21  |
|  | Vilberg and Rugg., 2007   | 23 | Pairs of pic | Remember, know, new             | Remember > know             | -9  | -78 | 33  |
|  |                           |    |              |                                 |                             | -18 | 33  | 51  |
|  |                           |    |              |                                 |                             | -48 | 27  | 33  |
|  |                           |    |              |                                 |                             | -36 | 21  | 51  |
|  |                           |    |              |                                 |                             | 36  | -27 | 69  |
|  |                           |    |              |                                 |                             | 6   | 9   | -3  |
|  |                           |    |              |                                 |                             | -15 | -3  | -15 |
|  |                           |    |              |                                 |                             | -36 | -9  | -36 |
|  |                           |    |              |                                 |                             | -51 | -57 | -21 |
|  |                           |    |              |                                 |                             | -24 | -87 | -21 |
|  |                           |    |              |                                 |                             | 30  | -33 | -21 |
|  |                           |    |              |                                 |                             | 33  | -60 | 57  |
|  |                           |    |              |                                 |                             | -36 | -78 | 33  |
|  | Vilberg and Rugg., 2012   | 21 | Words/pic    | Old/new, maintain over a delay  | Old > new and sustained > t | -48 | 32  | 13  |
|  |                           |    |              |                                 |                             | -51 | 26  | 28  |
|  |                           |    |              |                                 |                             | 6   | 35  | 46  |
|  |                           |    |              |                                 |                             | 9   | 11  | 1   |



|                       |                      |    |          |                |                                   |     |     |     |
|-----------------------|----------------------|----|----------|----------------|-----------------------------------|-----|-----|-----|
|                       |                      |    |          |                |                                   | -3  | -54 | 6   |
|                       |                      |    |          |                |                                   | 0   | -45 | 30  |
|                       |                      |    |          |                |                                   | 60  | -24 | 15  |
|                       |                      |    |          |                |                                   | -54 | -27 | 18  |
|                       |                      |    |          |                |                                   | -21 | -42 | 63  |
|                       |                      |    |          |                |                                   | 36  | -36 | 60  |
|                       |                      |    |          |                |                                   | -45 | -21 | 39  |
|                       |                      |    |          |                |                                   | 54  | -12 | 48  |
|                       |                      |    |          |                |                                   | -42 | -54 | 15  |
|                       |                      |    |          |                |                                   | -54 | -42 | 21  |
|                       |                      |    |          |                |                                   | -45 | -3  | -3  |
|                       |                      |    |          |                |                                   | 54  | -69 | 9   |
|                       |                      |    |          |                |                                   | 57  | -48 | 3   |
|                       |                      |    |          |                |                                   | -54 | -63 | 0   |
|                       |                      |    |          |                |                                   | 66  | -39 | -3  |
|                       |                      |    |          |                |                                   | -24 | -21 | -21 |
|                       |                      |    |          |                |                                   | 30  | -21 | -21 |
|                       |                      |    |          |                |                                   | -15 | -51 | -15 |
|                       |                      |    |          |                |                                   | 15  | -60 | -15 |
|                       |                      |    |          |                |                                   | -45 | -6  | 12  |
|                       |                      |    |          |                |                                   | 18  | -3  | 12  |
| Numerical calculation | Chochon et al., 1999 | 8  | Numerals | Multiplication | Multiplication > digit naming     | -54 | 9   | 39  |
|                       |                      |    |          |                |                                   | -31 | -72 | 40  |
|                       |                      |    |          |                |                                   | -47 | -33 | 40  |
|                       |                      |    |          |                |                                   | 54  | -25 | 51  |
|                       | Dehaene et al., 1999 | 7  | Numerals | Addition       | Exact > approximate (i.e. Verbal) | -34 | 70  | -6  |
|                       |                      |    |          |                |                                   | -8  | 67  | 7   |
|                       |                      |    |          |                |                                   | -7  | -56 | 23  |
|                       |                      |    |          |                |                                   | 23  | -81 | 34  |
|                       |                      |    |          |                |                                   | 45  | -77 | 25  |
|                       |                      |    |          |                |                                   | -46 | -72 | 44  |
|                       |                      |    |          |                |                                   | 53  | -15 | 5   |
|                       | Delazer et al., 2003 | 13 | Numerals | Multiplication | Untrained multiplication > r      | -7  | -75 | 52  |
|                       |                      |    |          |                |                                   | -49 | 20  | -15 |
|                       |                      |    |          |                |                                   | -53 | 12  | 18  |
|                       |                      |    |          |                |                                   | -26 | 10  | 62  |
|                       |                      |    |          |                |                                   | -1  | -80 | 17  |
|                       |                      |    |          |                |                                   | -5  | -88 | -23 |

|  |                         |    |          |                   |                              |     |     |     |
|--|-------------------------|----|----------|-------------------|------------------------------|-----|-----|-----|
|  |                         |    |          |                   |                              | 19  | -67 | 69  |
|  |                         |    |          |                   |                              | 55  | 21  | 19  |
|  |                         |    |          |                   |                              | 33  | 24  | -21 |
|  |                         |    |          |                   |                              | 49  | 38  | 13  |
|  |                         |    |          |                   |                              | 6   | 29  | 33  |
|  |                         |    |          |                   |                              | 34  | -99 | -9  |
|  |                         |    |          |                   |                              | 44  | -78 | -33 |
|  | Delazer et al., 2004    | 13 | Numerals | Multiplication    | Multiplication untrained > t | -20 | -52 | 64  |
|  |                         |    |          |                   |                              | -68 | -22 | 26  |
|  |                         |    |          |                   |                              | -53 | 10  | 18  |
|  |                         |    |          |                   |                              | -66 | -35 | 22  |
|  |                         |    |          |                   |                              | -7  | -88 | 4   |
|  | de Pisapia et al., 2007 | 20 | Numerals | Mental arithmetic | Mental arithmetic            | -5  | 11  | 65  |
|  |                         |    |          |                   |                              | 21  | 26  | 19  |
|  |                         |    |          |                   |                              | -31 | -36 | 40  |
|  |                         |    |          |                   |                              | -64 | -6  | 17  |
|  |                         |    |          |                   |                              | 40  | -64 | -19 |
|  |                         |    |          |                   |                              | -38 | -83 | -13 |
|  |                         |    |          |                   |                              | -25 | -91 | 2   |
|  |                         |    |          |                   |                              | -31 | -69 | 33  |
|  |                         |    |          |                   |                              | 14  | -92 | -6  |
|  | Fehr et al., 2007       | 11 | Numerals | Multiplication    | Complex > simple             | 4   | 25  | 45  |
|  |                         |    |          |                   |                              | -40 | 49  | 33  |
|  |                         |    |          |                   |                              | -42 | 38  | 29  |
|  |                         |    |          |                   |                              | 49  | 33  | 20  |
|  |                         |    |          |                   |                              | 49  | 16  | 25  |
|  |                         |    |          |                   |                              | 31  | -69 | -15 |
|  |                         |    |          |                   |                              | -7  | -36 | -1  |
|  |                         |    |          |                   |                              | -3  | -5  | 5   |
|  |                         |    |          |                   |                              | -3  | -20 | 9   |
|  | Grabner et al., 2007    | 25 | Numerals | Multiplication    | Multi-digit > single-digit   | 36  | -68 | -26 |
|  |                         |    |          |                   |                              | -28 | 26  | -4  |
|  |                         |    |          |                   |                              | 30  | 30  | -2  |
|  |                         |    |          |                   |                              | -36 | -42 | 44  |
|  |                         |    |          |                   |                              | -46 | 8   | 30  |
|  |                         |    |          |                   |                              | -42 | -66 | -30 |
|  |                         |    |          |                   |                              | 0   | -74 | -24 |
|  |                         |    |          |                   |                              | 10  | 26  | 36  |

|  |                        |    |          |                |                             |     |     |     |
|--|------------------------|----|----------|----------------|-----------------------------|-----|-----|-----|
|  |                        |    |          |                |                             | -26 | -2  | 54  |
|  |                        |    |          |                |                             | -10 | 16  | 44  |
|  |                        |    |          |                |                             | 0   | -70 | 10  |
|  |                        |    |          |                |                             | 38  | -46 | 42  |
|  |                        |    |          |                |                             | 24  | -28 | 6   |
|  | Hanakawa et al., 2003  | 16 | Numerals | Addition       | Mental operation > verbal r | -38 | -62 | -28 |
|  |                        |    |          |                |                             | 30  | -58 | 40  |
|  |                        |    |          |                |                             | -24 | -68 | 40  |
|  |                        |    |          |                |                             | 30  | -52 | 34  |
|  |                        |    |          |                |                             | 34  | 2   | 54  |
|  |                        |    |          |                |                             | -30 | -8  | 54  |
|  |                        |    |          |                |                             | -50 | 8   | 22  |
|  |                        |    |          |                |                             | -44 | 28  | 16  |
|  |                        |    |          |                |                             | 38  | -74 | 20  |
|  | Ischebeck et al., 2006 | 12 | Numerals | Multiplication | Untrained > trained         | -3  | 9   | 51  |
|  |                        |    |          |                |                             | -51 | 6   | -27 |
|  |                        |    |          |                |                             | -18 | -21 | 15  |
|  |                        |    |          |                |                             | 42  | -45 | 45  |
|  |                        |    |          |                |                             | -33 | -66 | 39  |
|  | Ischebeck et al., 2007 | 18 | Numerals | Multiplication | Novel > repeated            | -6  | 15  | 39  |
|  |                        |    |          |                |                             | 15  | 6   | 12  |
|  | Ischebeck et al., 2009 | 17 | Numerals | Multiplication | Untrained > trained         | -42 | 9   | 24  |
|  |                        |    |          |                |                             | -24 | 18  | 3   |
|  |                        |    |          |                |                             | -6  | -15 | 51  |
|  |                        |    |          |                |                             | -30 | 6   | 57  |
|  |                        |    |          |                |                             | 30  | 30  | 6   |
|  |                        |    |          |                |                             | 45  | 39  | 15  |
|  |                        |    |          |                |                             | 30  | 9   | 57  |
|  |                        |    |          |                |                             | -18 | -3  | 18  |
|  |                        |    |          |                |                             | 18  | 3   | 21  |
|  |                        |    |          |                |                             | 24  | -30 | 6   |
|  |                        |    |          |                |                             | -24 | -57 | 51  |
|  |                        |    |          |                |                             | 48  | -33 | 51  |
|  |                        |    |          |                |                             | 24  | -63 | 63  |
|  |                        |    |          |                |                             | 18  | -69 | 51  |
|  |                        |    |          |                |                             | -21 | -87 | 3   |
|  |                        |    |          |                |                             | -30 | -69 | 30  |
|  | Kong et al., 2005      | 16 | Numerals | Arithmetic     | Complex > simple            | -3  | 15  | 51  |

|  |                      |    |          |                              |                                |     |     |     |
|--|----------------------|----|----------|------------------------------|--------------------------------|-----|-----|-----|
|  |                      |    |          |                              |                                | 6   | 21  | 42  |
|  |                      |    |          |                              |                                | -45 | 9   | 27  |
|  |                      |    |          |                              |                                | -24 | -78 | 36  |
|  | Krueger et al., 2008 | 18 | Numerals | Integrate/ font verification | Integration > font verificatio | -46 | -54 | 50  |
|  |                      |    |          |                              |                                | -42 | 21  | 42  |
|  |                      |    |          |                              |                                | -29 | 22  | 51  |
|  |                      |    |          |                              |                                | -51 | 27  | 25  |
|  |                      |    |          |                              |                                | -6  | -68 | 68  |
|  |                      |    |          |                              |                                | -37 | -69 | 57  |
|  |                      |    |          |                              |                                | -7  | -71 | 44  |
|  |                      |    |          |                              |                                | 45  | -71 | 43  |
|  |                      |    |          |                              |                                | -33 | -79 | 50  |
|  |                      |    |          |                              |                                | 2   | -30 | 38  |
|  |                      |    |          |                              |                                | -3  | -37 | 22  |
|  |                      |    |          |                              |                                | -3  | -28 | 25  |
|  | Lee et al., 2000     | 11 | Numerals | Arithmetic                   | Multiplication > subtraction   | -52 | -54 | 36  |
|  |                      |    |          |                              |                                | -23 | 41  | 41  |
|  |                      |    |          |                              |                                | 13  | -78 | 8   |
|  |                      |    |          |                              |                                | 57  | -5  | 22  |
|  |                      |    |          |                              |                                | 3   | 56  | 8   |
|  |                      |    |          |                              |                                | -1  | -41 | 54  |
|  | Menon et al., 2000   | 16 | Numerals | Arithmetic                   | 3-operand > digit strings      | 34  | -75 | 47  |
|  |                      |    |          |                              |                                | -26 | -77 | 51  |
|  |                      |    |          |                              |                                | -50 | -47 | 57  |
|  |                      |    |          |                              |                                | -53 | -66 | -8  |
|  |                      |    |          |                              |                                | -38 | -73 | -37 |
|  |                      |    |          |                              |                                | 2   | 25  | 58  |
|  |                      |    |          |                              |                                | -46 | 15  | 24  |
|  |                      |    |          |                              |                                | -45 | 29  | -11 |
|  |                      |    |          |                              |                                | -37 | 4   | 45  |
|  |                      |    |          |                              |                                | 57  | 17  | 17  |
|  |                      |    |          |                              |                                | 36  | 29  | -6  |
|  |                      |    |          |                              |                                | 40  | -69 | -46 |
|  |                      |    |          |                              |                                | 32  | 12  | 65  |
|  |                      |    |          |                              |                                | -16 | -2  | 3   |
|  |                      |    |          |                              |                                | -12 | -13 | 6   |
|  | Menon et al., 2002   | 16 | Numerals | Arithmetic                   | Incorrect > correct            | -48 | 27  | 20  |
|  |                      |    |          |                              |                                | -49 | 45  | -15 |

|  |                          |    |           |                |                             |     |     |     |
|--|--------------------------|----|-----------|----------------|-----------------------------|-----|-----|-----|
|  | Molko et al., 2003       | 14 | Numerals  | Arithmetic     | Number size effect; large > | -46 | -49 | 59  |
|  |                          |    |           |                |                             | 32  | -67 | 44  |
|  |                          |    |           |                |                             | -12 | -83 | -32 |
|  |                          |    |           |                |                             | 2   | 28  | 46  |
|  |                          |    |           |                |                             | 28  | 20  | 56  |
|  |                          |    |           |                |                             | 15  | -71 | 47  |
|  |                          |    |           |                |                             | -34 | -75 | -37 |
|  | Prabhakaran et al., 2001 | 7  | Sentences | Arithmetic     | One operation > no operati  | -45 | 60  | -5  |
|  |                          |    |           |                |                             | -47 | 57  | 4   |
|  |                          |    |           |                |                             | -53 | 32  | 16  |
|  |                          |    |           |                |                             | -42 | 37  | 19  |
|  |                          |    |           |                |                             | 56  | 36  | 18  |
|  |                          |    |           |                |                             | -43 | 23  | 30  |
|  |                          |    |           |                |                             | 43  | 39  | 27  |
|  |                          |    |           |                |                             | -48 | 22  | 39  |
|  |                          |    |           |                |                             | 40  | 19  | 38  |
|  |                          |    |           |                |                             | 36  | 44  | -14 |
|  |                          |    |           |                |                             | 2   | 67  | 16  |
|  |                          |    |           |                |                             | -35 | 21  | 44  |
|  |                          |    |           |                |                             | -3  | 31  | 43  |
|  |                          |    |           |                |                             | -43 | 8   | 31  |
|  |                          |    |           |                |                             | 46  | 17  | 29  |
|  |                          |    |           |                |                             | 15  | -44 | 26  |
|  |                          |    |           |                |                             | 5   | 23  | 38  |
|  |                          |    |           |                |                             | 61  | -91 | -1  |
|  |                          |    |           |                |                             | -66 | -43 | 5   |
|  |                          |    |           |                |                             | -57 | -43 | -4  |
|  |                          |    |           |                |                             | 35  | -56 | 36  |
|  |                          |    |           |                |                             | -46 | -42 | 45  |
|  |                          |    |           |                |                             | -45 | -42 | 51  |
|  |                          |    |           |                |                             | 43  | -39 | 49  |
|  |                          |    |           |                |                             | -36 | -56 | 58  |
|  |                          |    |           |                |                             | 24  | -60 | 57  |
|  | Rickard et al., 2000     | 8  | Numerals  | Multiplication | Multiplication verification | -25 | -58 | 49  |
|  |                          |    |           |                |                             | 33  | -59 | 50  |
|  |                          |    |           |                |                             | -43 | -58 | -12 |
|  |                          |    |           |                |                             | 35  | -81 | -8  |
|  |                          |    |           |                |                             | -42 | 18  | 30  |

|  |                              |    |          |            |                              |     |     |    |
|--|------------------------------|----|----------|------------|------------------------------|-----|-----|----|
|  |                              |    |          |            |                              | 50  | 21  | 17 |
|  |                              |    |          |            |                              | -36 | 55  | 15 |
|  |                              |    |          |            |                              | 45  | 55  | 14 |
|  | Sammer et al., 2007          | 20 | Numerals | Arithmetic | Addition > reference         | -33 | -55 | 57 |
|  |                              |    |          |            |                              | 45  | -39 | 46 |
|  |                              |    |          |            |                              | -18 | 7   | 58 |
|  |                              |    |          |            |                              | -31 | 15  | 24 |
|  |                              |    |          |            |                              | -12 | -8  | 10 |
|  |                              |    |          |            |                              | 39  | -60 | 52 |
|  |                              |    |          |            |                              | 38  | 42  | 15 |
|  |                              |    |          |            |                              | -5  | 17  | 48 |
|  | Simon et al., 2002           | 10 | Numerals | Arithmetic | Subtraction > letter control | -7  | 15  | 52 |
|  |                              |    |          |            |                              | 6   | 41  | 50 |
|  |                              |    |          |            |                              | -28 | -1  | 63 |
|  |                              |    |          |            |                              | -37 | -55 | 33 |
|  |                              |    |          |            |                              | -28 | 7   | 58 |
|  |                              |    |          |            |                              | -46 | 38  | 24 |
|  |                              |    |          |            |                              | -47 | 62  | 4  |
|  |                              |    |          |            |                              | -59 | 17  | 26 |
|  |                              |    |          |            |                              | 49  | 25  | 19 |
|  |                              |    |          |            |                              | 57  | 11  | 7  |
|  |                              |    |          |            |                              | -7  | 30  | 24 |
|  |                              |    |          |            |                              | 6   | 30  | 28 |
|  |                              |    |          |            |                              | -34 | 31  | -7 |
|  |                              |    |          |            |                              | 40  | 27  | -8 |
|  |                              |    |          |            |                              | -50 | 2   | 54 |
|  |                              |    |          |            |                              | -33 | -70 | 61 |
|  |                              |    |          |            |                              | 36  | -58 | 50 |
|  |                              |    |          |            |                              | -11 | -70 | 56 |
|  |                              |    |          |            |                              | -63 | -28 | 49 |
|  |                              |    |          |            |                              | -37 | -63 | 43 |
|  |                              |    |          |            |                              | -29 | 14  | -5 |
|  |                              |    |          |            |                              | 18  | 11  | 3  |
|  |                              |    |          |            |                              | -42 | 18  | -6 |
|  | Stanescu-Cosson et al., 2000 | 7  | Numerals | Arithmetic | Calculation > letter matchin | -55 | 17  | 22 |
|  |                              |    |          |            |                              | -50 | 23  | 48 |
|  |                              |    |          |            |                              | 36  | -62 | 50 |
|  |                              |    |          |            |                              | 54  | -32 | 51 |



|                                 |                      |    |            |                          |                              |     |     |     |
|---------------------------------|----------------------|----|------------|--------------------------|------------------------------|-----|-----|-----|
|                                 |                      |    |            |                          |                              | 36  | -59 | 32  |
|                                 |                      |    |            |                          |                              | 53  | 51  | 16  |
|                                 |                      |    |            |                          |                              | 45  | 23  | 37  |
|                                 |                      |    |            |                          |                              | 48  | 35  | -13 |
|                                 |                      |    |            |                          |                              | -41 | -53 | 55  |
|                                 |                      |    |            |                          |                              | -63 | -41 | 54  |
|                                 |                      |    |            |                          |                              | -55 | 48  | -8  |
|                                 |                      |    |            |                          |                              | -64 | 45  | 10  |
|                                 |                      |    |            |                          |                              | -55 | 51  | 23  |
|                                 |                      |    |            |                          |                              | -7  | 41  | 50  |
|                                 |                      |    |            |                          |                              | -3  | 33  | 55  |
|                                 |                      |    |            |                          |                              | 6   | -79 | 12  |
|                                 | Wood et al., 2008    | 17 | Numerals   | Arithmetic               | Multiplication > non-multip  | -52 | -60 | 30  |
|                                 |                      |    |            |                          |                              | -15 | 56  | 30  |
|                                 | Zago et al., 2008    | 14 | Numerals   | Addition                 | Number manipulation > ma     | 10  | 36  | 28  |
|                                 |                      |    |            |                          |                              | -26 | 8   | 54  |
|                                 |                      |    |            |                          |                              | -46 | 10  | 22  |
|                                 |                      |    |            |                          |                              | -48 | 44  | 18  |
|                                 |                      |    |            |                          |                              | -30 | 30  | -6  |
|                                 |                      |    |            |                          |                              | 36  | 4   | 54  |
|                                 |                      |    |            |                          |                              | 54  | 14  | 10  |
|                                 |                      |    |            |                          |                              | 48  | 52  | 20  |
|                                 |                      |    |            |                          |                              | 38  | 26  | -2  |
|                                 |                      |    |            |                          |                              | 12  | 8   | 0   |
|                                 |                      |    |            |                          |                              | -12 | 10  | 4   |
|                                 |                      |    |            |                          |                              | -48 | -38 | 42  |
|                                 |                      |    |            |                          |                              | -54 | -34 | 46  |
|                                 |                      |    |            |                          |                              | -26 | -66 | 46  |
|                                 |                      |    |            |                          |                              | 32  | -64 | 48  |
|                                 |                      |    |            |                          |                              | 44  | -42 | 42  |
|                                 |                      |    |            |                          |                              | -52 | -56 | -14 |
|                                 |                      |    |            |                          |                              | 2   | -74 | -16 |
| <b>Numerical fact retrieval</b> | Ansari et al., 2007  | 13 | Dot arrays | Smaller/Larger judgement | Small array > Large array    | -41 | -33 | 51  |
|                                 |                      |    |            |                          |                              | 34  | -42 | 50  |
|                                 | Chochon et al., 1999 | 8  | Numerals   | Multiplication           | Multiplication > digit namin | -54 | 9   | 39  |
|                                 |                      |    |            |                          |                              | -31 | -72 | 40  |
|                                 |                      |    |            |                          |                              | -47 | -33 | 40  |
|                                 |                      |    |            |                          |                              | 54  | -25 | 51  |

|  |                        |    |          |                                        |                              |     |     |     |
|--|------------------------|----|----------|----------------------------------------|------------------------------|-----|-----|-----|
|  | Dehaene et al., 1999   | 7  | Numerals | Addition                               | Exact > approximate          | -34 | 70  | -6  |
|  |                        |    |          |                                        |                              | -8  | 67  | 7   |
|  |                        |    |          |                                        |                              | -7  | -56 | 23  |
|  |                        |    |          |                                        |                              | 23  | -81 | 34  |
|  |                        |    |          |                                        |                              | 45  | -77 | 25  |
|  |                        |    |          |                                        |                              | -46 | -72 | 44  |
|  |                        |    |          |                                        |                              | 53  | -15 | 5   |
|  | Delazer et al., 2003   | 13 | Numerals | Multiplication                         | Trained > untrained          | -48 | -60 | 29  |
|  |                        |    |          |                                        |                              | -49 | -15 | -38 |
|  |                        |    |          |                                        |                              | -11 | -43 | 27  |
|  |                        |    |          |                                        |                              | -22 | -42 | 36  |
|  |                        |    |          |                                        |                              | -24 | -15 | 51  |
|  |                        |    |          |                                        |                              | -23 | -64 | -34 |
|  | Delazer et al., 2004   | 13 | Numerals | Multiplication                         | Trained > untrained          | -7  | -88 | 4   |
|  |                        |    |          |                                        |                              | -48 | -60 | 29  |
|  |                        |    |          |                                        |                              | -49 | -15 | -38 |
|  |                        |    |          |                                        |                              | -11 | -43 | 27  |
|  |                        |    |          |                                        |                              | -22 | -42 | 36  |
|  |                        |    |          |                                        |                              | -24 | -15 | 51  |
|  |                        |    |          |                                        |                              | -23 | -64 | -34 |
|  | Grabner et al., 2007   | 25 | Numerals | Multiplication                         | Single digit > multi-digit   | -58 | -64 | 32  |
|  | Grabner et al., 2009a  | 28 | Numerals | Arithmetic                             | Retrieval > calculation      | -57 | -65 | 43  |
|  | Grabner et al., 2009b  | 28 | Numerals | Multiplication and figural-spatial cal | Trained > untrained          | -60 | -48 | 39  |
|  |                        |    |          |                                        |                              | 57  | -57 | 24  |
|  |                        |    |          |                                        |                              | -3  | -42 | 36  |
|  | Grabner et al., 2011   | 34 | Numerals | Arithmetic verification                | Confusion > non-confusion    | -51 | -51 | 36  |
|  |                        |    |          |                                        |                              | -21 | 42  | 30  |
|  | Ischebeck et al., 2006 | 12 | Numerals | Multiplication                         | Trained > untrained          | -48 | -66 | 39  |
|  | Ischebeck et al., 2007 | 18 | Numerals | Multiplication                         | Repeated > novel             | -66 | -30 | -6  |
|  |                        |    |          |                                        |                              | 66  | -39 | 27  |
|  |                        |    |          |                                        |                              | -51 | -63 | 33  |
|  | Ischebeck et al., 2009 | 17 | Numerals | Multiplication                         | Trained > untrained          | -45 | -69 | 45  |
|  |                        |    |          |                                        |                              | -9  | -48 | 33  |
|  | Lee et al., 2000       | 11 | Numerals | Arithmetic                             | Multiplication > subtraction | -52 | -54 | 36  |
|  |                        |    |          |                                        |                              | -23 | 41  | 41  |
|  |                        |    |          |                                        |                              | 13  | -78 | 8   |
|  |                        |    |          |                                        |                              | 57  | -5  | 22  |
|  |                        |    |          |                                        |                              | 3   | 56  | 8   |

|                              |                               |    |            |                               |                              |     |     |     |
|------------------------------|-------------------------------|----|------------|-------------------------------|------------------------------|-----|-----|-----|
|                              |                               |    |            |                               |                              | -1  | -41 | 54  |
|                              | Rickard et al., 2000          | 8  | Numerals   | Multiplication                | Multiplication verification  | -25 | -58 | 49  |
|                              |                               |    |            |                               |                              | 33  | -59 | 50  |
|                              |                               |    |            |                               |                              | -43 | -58 | -12 |
|                              |                               |    |            |                               |                              | 35  | -81 | -8  |
|                              |                               |    |            |                               |                              | -42 | 18  | 30  |
|                              |                               |    |            |                               |                              | 50  | 21  | 17  |
|                              |                               |    |            |                               |                              | -36 | 55  | 15  |
|                              |                               |    |            |                               |                              | 45  | 55  | 14  |
|                              | Rosenberg et al., 2011        | 20 | Numerals   | Mathematical verification     | Identification > calculation | 50  | -66 | 14  |
|                              |                               |    |            |                               |                              | -48 | -72 | 38  |
|                              |                               |    |            |                               |                              | -50 | -58 | 20  |
|                              |                               |    |            |                               |                              | 6   | -60 | 60  |
|                              |                               |    |            |                               |                              | 6   | -68 | 60  |
|                              |                               |    |            |                               |                              | 48  | -54 | 34  |
|                              |                               |    |            |                               |                              | 48  | -64 | 16  |
|                              | Stanescu-Cosson, et al., 2000 | 7  | Numerals   | Arithmetic                    | Exact > approximate          | -34 | 70  | -6  |
|                              |                               |    |            |                               |                              | -42 | 65  | -15 |
|                              |                               |    |            |                               |                              | -8  | 67  | 7   |
|                              |                               |    |            |                               |                              | -7  | -56 | 23  |
|                              |                               |    |            |                               |                              | 23  | -81 | 34  |
|                              |                               |    |            |                               |                              | 45  | -77 | 25  |
|                              |                               |    |            |                               |                              | -46 | -72 | 44  |
|                              |                               |    |            |                               |                              | -46 | -64 | 29  |
|                              |                               |    |            |                               |                              | -64 | -70 | -28 |
|                              |                               |    |            |                               |                              | 53  | -15 | 5   |
|                              |                               |    |            |                               |                              | 62  | -10 | 4   |
|                              |                               |    |            |                               |                              | 75  | -11 | -5  |
|                              | Wood et al., 2008             | 17 | Numerals   | Arithmetic                    | Multiplication > non-multip  | -52 | -60 | 30  |
|                              |                               |    |            |                               |                              | -15 | 56  | 30  |
|                              | Wu et al., 2009               | 18 | Arabic and | Verification                  | Arabic > Roman               | -46 | -72 | 20  |
|                              |                               |    |            |                               |                              | -4  | 56  | 24  |
| <b>Phonological decision</b> | Baciu et al., 2005            | 10 | Words      | Rhyme or perceptual judgement | Rhyme > visual detection     | -48 | -59 | -7  |
|                              |                               |    |            |                               |                              | -48 | -47 | -12 |
|                              |                               |    |            |                               |                              | -42 | 31  | 2   |
|                              |                               |    |            |                               |                              | -51 | 13  | 21  |
|                              |                               |    |            |                               |                              | -24 | -60 | 36  |
|                              |                               |    |            |                               |                              | -24 | -58 | 44  |

|  |                      |    |             |                       |                             |     |     |     |
|--|----------------------|----|-------------|-----------------------|-----------------------------|-----|-----|-----|
|  |                      |    |             |                       |                             | -50 | -33 | 20  |
|  |                      |    |             |                       |                             | -44 | 45  | 16  |
|  |                      |    |             |                       |                             | -36 | -71 | 32  |
|  | Bohland et al., 2006 | 13 | Syllable se | Go/NoGo overt reading | Complex syllable > simple s | 0   | 18  | 46  |
|  |                      |    |             |                       |                             | 0   | 4   | 62  |
|  |                      |    |             |                       |                             | 0   | 0   | 70  |
|  |                      |    |             |                       |                             | 4   | 24  | 38  |
|  |                      |    |             |                       |                             | 50  | 22  | -6  |
|  |                      |    |             |                       |                             | 42  | 20  | -12 |
|  |                      |    |             |                       |                             | 38  | 26  | 0   |
|  |                      |    |             |                       |                             | 38  | 24  | -6  |
|  |                      |    |             |                       |                             | -26 | -62 | 52  |
|  |                      |    |             |                       |                             | -30 | -54 | 52  |
|  |                      |    |             |                       |                             | -48 | -40 | 52  |
|  |                      |    |             |                       |                             | -20 | -66 | 66  |
|  |                      |    |             |                       |                             | -38 | -44 | 44  |
|  |                      |    |             |                       |                             | -34 | 26  | 0   |
|  |                      |    |             |                       |                             | -34 | 22  | 4   |
|  |                      |    |             |                       |                             | -50 | 12  | 0   |
|  |                      |    |             |                       |                             | 22  | -76 | -20 |
|  |                      |    |             |                       |                             | 26  | -62 | -18 |
|  |                      |    |             |                       |                             | 0   | 16  | 48  |
|  |                      |    |             |                       |                             | -8  | 8   | 62  |
|  |                      |    |             |                       |                             | 2   | 34  | 36  |
|  |                      |    |             |                       |                             | 8   | 26  | 34  |
|  |                      |    |             |                       |                             | 0   | 16  | 66  |
|  |                      |    |             |                       |                             | 2   | 14  | 32  |
|  |                      |    |             |                       |                             | -6  | 24  | 28  |
|  |                      |    |             |                       |                             | 34  | 22  | -8  |
|  |                      |    |             |                       |                             | 38  | 44  | 24  |
|  |                      |    |             |                       |                             | 52  | 20  | -4  |
|  |                      |    |             |                       |                             | 40  | 20  | 10  |
|  |                      |    |             |                       |                             | 52  | 34  | 26  |
|  |                      |    |             |                       |                             | 58  | 24  | 14  |
|  |                      |    |             |                       |                             | -42 | 30  | 24  |
|  |                      |    |             |                       |                             | -30 | 24  | 6   |
|  |                      |    |             |                       |                             | -42 | 46  | 22  |
|  |                      |    |             |                       |                             | -36 | 16  | -8  |

|  |                    |    |            |                                   |                   |     |     |     |
|--|--------------------|----|------------|-----------------------------------|-------------------|-----|-----|-----|
|  |                    |    |            |                                   |                   | -58 | 14  | 18  |
|  |                    |    |            |                                   |                   | -52 | 16  | 14  |
|  |                    |    |            |                                   |                   | -44 | 14  | 4   |
|  |                    |    |            |                                   |                   | -62 | 6   | 28  |
|  |                    |    |            |                                   |                   | -40 | 12  | 26  |
|  |                    |    |            |                                   |                   | -52 | 10  | 44  |
|  |                    |    |            |                                   |                   | -50 | 4   | 36  |
|  |                    |    |            |                                   |                   | 42  | -50 | -30 |
|  |                    |    |            |                                   |                   | 28  | -52 | -24 |
|  |                    |    |            |                                   |                   | 32  | -52 | -28 |
|  |                    |    |            |                                   |                   | 36  | -56 | -28 |
|  |                    |    |            |                                   |                   | -2  | -72 | -8  |
|  |                    |    |            |                                   |                   | 14  | -66 | -12 |
|  |                    |    |            |                                   |                   | 42  | -72 | -28 |
|  |                    |    |            |                                   |                   | 2   | -56 | -32 |
|  |                    |    |            |                                   |                   | 14  | -58 | -20 |
|  |                    |    |            |                                   |                   | 14  | -54 | -14 |
|  |                    |    |            |                                   |                   | 16  | -6  | 14  |
|  |                    |    |            |                                   |                   | -10 | 0   | 10  |
|  |                    |    |            |                                   |                   | 10  | -2  | 12  |
|  |                    |    |            |                                   |                   | -4  | -10 | 14  |
|  |                    |    |            |                                   |                   | 8   | -8  | 2   |
|  |                    |    |            |                                   |                   | -30 | -52 | 50  |
|  |                    |    |            |                                   |                   | -40 | -44 | 54  |
|  |                    |    |            |                                   |                   | -52 | -40 | 56  |
|  |                    |    |            |                                   |                   | -36 | -48 | 42  |
|  |                    |    |            |                                   |                   | -24 | -72 | 46  |
|  |                    |    |            |                                   |                   | -18 | -68 | 64  |
|  |                    |    |            |                                   |                   | 34  | 2   | 58  |
|  |                    |    |            |                                   |                   | 34  | 2   | 38  |
|  |                    |    |            |                                   |                   | 34  | 4   | 44  |
|  |                    |    |            |                                   |                   | 44  | 12  | 38  |
|  |                    |    |            |                                   |                   | 34  | 0   | 48  |
|  |                    |    |            |                                   |                   | -44 | -58 | -16 |
|  |                    |    |            |                                   |                   | -32 | 0   | 52  |
|  |                    |    |            |                                   |                   | -38 | 0   | 62  |
|  |                    |    |            |                                   |                   | -38 | -4  | 42  |
|  | Booth et al., 2002 | 13 | Visual and | Rhyme judgement / Semantic associ | Rhyming > Meaning | -6  | -36 | 45  |

|  |                      |    |               |                                        |                           |     |     |     |
|--|----------------------|----|---------------|----------------------------------------|---------------------------|-----|-----|-----|
|  |                      |    |               |                                        |                           | -57 | -21 | 39  |
|  |                      |    |               |                                        |                           | 0   | -39 | 24  |
|  |                      |    |               |                                        |                           | -6  | -63 | 24  |
|  |                      |    |               |                                        |                           | -9  | 57  | -12 |
|  |                      |    |               |                                        | Rhyme > spell             | -3  | -9  | 48  |
|  |                      |    |               |                                        |                           | 63  | -24 | 24  |
|  |                      |    |               |                                        |                           | 48  | -39 | 24  |
|  |                      |    |               |                                        |                           | -57 | -42 | 24  |
|  |                      |    |               |                                        |                           | -63 | -30 | 15  |
|  |                      |    |               |                                        |                           | 39  | -30 | 15  |
|  |                      |    |               |                                        |                           | 54  | -6  | 3   |
|  |                      |    |               |                                        |                           | -42 | 6   | -6  |
|  |                      |    |               |                                        |                           | -48 | -15 | 51  |
|  |                      |    |               |                                        |                           | -6  | -24 | 45  |
|  |                      |    |               |                                        |                           | -3  | -72 | 36  |
|  |                      |    |               |                                        |                           | -42 | -69 | 33  |
|  |                      |    |               |                                        |                           | 63  | -21 | 27  |
|  |                      |    |               |                                        |                           | -57 | -21 | 21  |
|  |                      |    |               |                                        |                           | -42 | 6   | -9  |
|  |                      |    |               |                                        |                           | 0   | 57  | -12 |
|  | Booth et al., 2006   | 13 | Words         | Phonological > Semantic                | Phonological > Semantic   | -36 | 42  | -21 |
|  |                      |    |               |                                        |                           | -18 | -66 | 54  |
|  |                      |    |               |                                        |                           | -54 | -27 | 51  |
|  |                      |    |               |                                        |                           | -24 | -3  | 48  |
|  | Cousin et al., 2007  | 11 | written words | living or nonliving? / rhyme judgement | Phonological > Semantic   | -53 | 5   | 3   |
|  |                      |    |               |                                        |                           | -47 | 50  | 36  |
|  | Demonet et al., 1994 | 9  | Non-words     | Phoneme detection                      | Phoneme > tones           | -59 | -1  | -3  |
|  |                      |    |               |                                        |                           | -29 | -72 | -6  |
|  |                      |    |               |                                        |                           | -44 | -49 | -12 |
|  |                      |    |               |                                        |                           | -52 | -11 | 47  |
|  |                      |    |               |                                        |                           | -7  | -63 | 15  |
|  | Desai et al., 2006   | 25 | Words         | Verb generation                        | Irregular > regular verbs | 9   | 5   | 1   |
|  |                      |    |               |                                        |                           | -33 | -54 | 45  |
|  |                      |    |               |                                        |                           | -51 | 9   | 21  |
|  |                      |    |               |                                        |                           | 36  | -62 | 45  |
|  |                      |    |               |                                        |                           | 39  | 27  | -1  |
|  |                      |    |               |                                        |                           | 51  | 7   | 31  |
|  |                      |    |               |                                        |                           | -30 | -75 | 26  |

|  |                      |    |               |                         |                             |     |     |     |
|--|----------------------|----|---------------|-------------------------|-----------------------------|-----|-----|-----|
|  |                      |    |               |                         |                             | -45 | -56 | -4  |
|  |                      |    |               |                         |                             | -51 | 33  | -1  |
|  |                      |    |               |                         |                             | -47 | -1  | 41  |
|  |                      |    |               |                         |                             | -12 | -27 | 6   |
|  | Devlin et al., 2003  | 12 | Words         | Phonological > Semantic | Phonological > Semantic     | -44 | 38  | -20 |
|  |                      |    |               |                         |                             | -50 | 6   | 24  |
|  |                      |    |               |                         |                             | 44  | 36  | 26  |
|  |                      |    |               |                         |                             | 46  | 28  | -16 |
|  |                      |    |               |                         |                             | 36  | 24  | -8  |
|  |                      |    |               |                         |                             | -30 | 20  | -8  |
|  |                      |    |               |                         |                             | -42 | 34  | 12  |
|  |                      |    |               |                         |                             | 6   | 36  | 42  |
|  |                      |    |               |                         |                             | 24  | 52  | -8  |
|  |                      |    |               |                         |                             | 46  | -44 | 44  |
|  |                      |    |               |                         |                             | -42 | -40 | 46  |
|  |                      |    |               |                         |                             | 28  | -68 | 44  |
|  |                      |    |               |                         |                             | -20 | -68 | 46  |
|  |                      |    |               |                         |                             | -48 | -66 | -20 |
|  |                      |    |               |                         |                             | 52  | -56 | -16 |
|  | Fiebach et al., 2007 | 12 | written words | Item present or not     | Phonological > Semantic (re | 46  | -3  | -5  |
|  |                      |    |               |                         |                             | 49  | -66 | 27  |
|  |                      |    |               |                         |                             | 12  | 54  | -7  |
|  | Ghosh et al., 2008   | 10 | Syllables     | Syllable reading        | Bisyllable > monosyllable   | -52 | -6  | 30  |
|  |                      |    |               |                         |                             | -46 | -8  | 54  |
|  |                      |    |               |                         |                             | 50  | -4  | 38  |
|  |                      |    |               |                         |                             | -56 | 16  | 20  |
|  |                      |    |               |                         |                             | -60 | 16  | 32  |
|  |                      |    |               |                         |                             | -6  | 4   | 68  |
|  |                      |    |               |                         |                             | 8   | 16  | 44  |
|  |                      |    |               |                         |                             | 54  | -2  | 32  |
|  |                      |    |               |                         |                             | -24 | -70 | 42  |
|  |                      |    |               |                         |                             | -20 | -70 | 48  |
|  |                      |    |               |                         |                             | 24  | -68 | 50  |
|  |                      |    |               |                         |                             | -32 | -52 | 50  |
|  |                      |    |               |                         |                             | -62 | -2  | -10 |
|  |                      |    |               |                         |                             | -66 | -18 | 2   |
|  |                      |    |               |                         |                             | 70  | -2  | -6  |
|  |                      |    |               |                         |                             | 70  | -28 | 4   |

|  |                         |    |            |                            |                         |     |      |     |
|--|-------------------------|----|------------|----------------------------|-------------------------|-----|------|-----|
|  |                         |    |            |                            |                         | -58 | 6    | -12 |
|  |                         |    |            |                            |                         | -42 | -64  | -10 |
|  |                         |    |            |                            |                         | 18  | -92  | -12 |
|  |                         |    |            |                            |                         | -38 | -50  | -24 |
|  |                         |    |            |                            |                         | -40 | -44  | -24 |
|  |                         |    |            |                            |                         | -22 | 4    | 4   |
|  |                         |    |            |                            |                         | 26  | 4    | 0   |
|  |                         |    |            |                            |                         | 22  | 8    | 4   |
|  |                         |    |            |                            |                         | -22 | 0    | -4  |
|  |                         |    |            |                            |                         | -30 | -84  | -20 |
|  |                         |    |            |                            |                         | -8  | -80  | -32 |
|  |                         |    |            |                            |                         | -30 | -60  | -28 |
|  |                         |    |            |                            |                         | -32 | -56  | -26 |
|  |                         |    |            |                            |                         | 28  | -62  | -26 |
|  |                         |    |            |                            |                         | 2   | -102 | -6  |
|  |                         |    |            |                            |                         | 14  | -66  | 10  |
|  |                         |    |            |                            |                         | -46 | -84  | -2  |
|  |                         |    |            |                            |                         | -28 | -82  | 16  |
|  |                         |    |            |                            |                         | -16 | -92  | -10 |
|  |                         |    |            |                            |                         | 34  | -88  | 20  |
|  |                         |    |            |                            |                         | 34  | -80  | -16 |
|  | Gitelman et al., 2005   | 14 | Words      | Phonological > Semantic    | Phonological > Semantic | 15  | -81  | -36 |
|  |                         |    |            |                            |                         | -57 | 9    | 24  |
|  |                         |    |            |                            |                         | -48 | 3    | 18  |
|  |                         |    |            |                            |                         | 42  | 33   | -12 |
|  |                         |    |            |                            |                         | 51  | 39   | 0   |
|  |                         |    |            |                            |                         | 51  | 45   | -12 |
|  |                         |    |            |                            |                         | -45 | -3   | 48  |
|  |                         |    |            |                            |                         | 42  | 12   | -18 |
|  |                         |    |            |                            |                         | 27  | 9    | -21 |
|  |                         |    |            |                            |                         | 18  | -15  | -21 |
|  | Gold and Buckner., 2002 | 24 | written wd | Short or long vowel item   | Phonological > Semantic | -43 | -41  | 38  |
|  |                         |    |            |                            |                         | -58 | 3    | 27  |
|  | Gold et al., 2005       | 32 | written wd | Regularise irregular words | Phonological > Semantic | -43 | -41  | 38  |
|  |                         |    |            |                            |                         | -58 | 3    | 27  |
|  | Gourovitch et al., 2000 | 18 | Words      | Phonological > Semantic    | Phonological > Semantic | -37 | -77  | 26  |
|  |                         |    |            |                            |                         | 25  | 38   | 23  |
|  |                         |    |            |                            |                         | 46  | 13   | 2   |



|  |                     |    |             |                                     |                             |     |     |     |
|--|---------------------|----|-------------|-------------------------------------|-----------------------------|-----|-----|-----|
|  |                     |    |             |                                     |                             | -57 | 5   | 18  |
|  |                     |    |             |                                     |                             | -38 | 8   | -5  |
|  |                     |    |             |                                     |                             | 48  | 7   | -15 |
|  | Gruber et al., 2010 | 18 | Letter sequ | Phonological rehearsal or orthograp | Phonological > orthographi  | -36 | 52  | 12  |
|  |                     |    |             |                                     |                             | 36  | 44  | 28  |
|  |                     |    |             |                                     |                             | -44 | -40 | 40  |
|  |                     |    |             |                                     |                             | 48  | -40 | 40  |
|  |                     |    |             |                                     |                             | 0   | 12  | 52  |
|  |                     |    |             |                                     |                             | -28 | -60 | 40  |
|  |                     |    |             |                                     |                             | 32  | -56 | 44  |
|  |                     |    |             |                                     |                             | -40 | 16  | -4  |
|  |                     |    |             |                                     |                             | 32  | 24  | -4  |
|  |                     |    |             |                                     |                             | -36 | -56 | -36 |
|  |                     |    |             |                                     |                             | 24  | -64 | -28 |
|  |                     |    |             |                                     |                             | -16 | -4  | 16  |
|  |                     |    |             |                                     |                             | 20  | 4   | 16  |
|  |                     |    |             |                                     |                             | -44 | 8   | 24  |
|  |                     |    |             |                                     |                             | -48 | -56 | -16 |
|  |                     |    |             |                                     |                             | -4  | -24 | -16 |
|  | Heim et al., 2008   | 28 | written wd  | Phonological Fluency                | Phonological > Semantic flu | -50 | 10  | 21  |
|  |                     |    |             |                                     |                             | -40 | -40 | 47  |
|  | Katzir et al., 2005 | 12 | Objects     | Phonological judgement/ perceptua   | Phonological blend > perce  | -39 | -69 | -12 |
|  |                     |    |             |                                     |                             | -51 | 15  | 33  |
|  |                     |    |             |                                     |                             | 33  | -93 | -3  |
|  |                     |    |             |                                     |                             | 33  | 30  | -12 |
|  |                     |    |             |                                     |                             | -3  | 36  | 45  |
|  |                     |    |             |                                     |                             | -6  | -21 | -6  |
|  |                     |    |             |                                     |                             | 30  | -33 | 0   |
|  |                     |    |             |                                     |                             | -27 | -60 | 42  |
|  |                     |    |             |                                     |                             | 12  | 3   | 0   |
|  |                     |    |             |                                     |                             | 45  | 24  | 27  |
|  |                     |    |             |                                     |                             | 42  | 3   | 27  |
|  |                     |    |             |                                     |                             | 33  | -93 | -3  |
|  |                     |    |             |                                     |                             | 12  | 18  | 45  |
|  |                     |    |             |                                     |                             | -33 | -84 | -15 |
|  |                     |    |             |                                     |                             | -45 | 21  | 24  |
|  |                     |    |             |                                     |                             | 33  | 21  | 0   |
|  |                     |    |             |                                     |                             | -30 | -60 | 45  |

|  |                  |    |             |                                    |                         |     |     |     |
|--|------------------|----|-------------|------------------------------------|-------------------------|-----|-----|-----|
|  |                  |    |             |                                    |                         | -36 | -12 | -33 |
|  |                  |    |             |                                    |                         | 27  | -33 | -3  |
|  |                  |    |             |                                    |                         | 21  | -6  | 15  |
|  |                  |    |             |                                    |                         | 0   | -45 | -21 |
|  |                  |    |             |                                    |                         | -60 | -45 | -3  |
|  |                  |    |             |                                    |                         | 51  | 36  | 30  |
|  | Kuo et al., 2004 | 10 | Chinese ch  | Homophone or orthographic judgen   | Homophone > orthography | -48 | 0   | 46  |
|  |                  |    |             |                                    |                         | -4  | 14  | 52  |
|  |                  |    |             |                                    |                         | -44 | 10  | 34  |
|  |                  |    |             |                                    |                         | -50 | 24  | 26  |
|  |                  |    |             |                                    |                         | -46 | 18  | 18  |
|  |                  |    |             |                                    |                         | -42 | 6   | 18  |
|  |                  |    |             |                                    |                         | -24 | -62 | 44  |
|  |                  |    |             |                                    |                         | -38 | -46 | 52  |
|  |                  |    |             |                                    |                         | -54 | -42 | 14  |
|  |                  |    |             |                                    |                         | -34 | -84 | 4   |
|  |                  |    |             |                                    |                         | -42 | -62 | 2   |
|  |                  |    |             |                                    |                         | -32 | -78 | -2  |
|  |                  |    |             |                                    |                         | -36 | -54 | -8  |
|  |                  |    |             |                                    |                         | 8   | 28  | 36  |
|  |                  |    |             |                                    |                         | 42  | 14  | 26  |
|  |                  |    |             |                                    |                         | 32  | -84 | 6   |
|  |                  |    |             |                                    |                         | -46 | 2   | 44  |
|  |                  |    |             |                                    |                         | -4  | 14  | 56  |
|  |                  |    |             |                                    |                         | -40 | 14  | 30  |
|  |                  |    |             |                                    |                         | -48 | 26  | 22  |
|  |                  |    |             |                                    |                         | -46 | 16  | 22  |
|  |                  |    |             |                                    |                         | -46 | 4   | 22  |
|  |                  |    |             |                                    |                         | -48 | 16  | 2   |
|  |                  |    |             |                                    |                         | -42 | -54 | 42  |
|  |                  |    |             |                                    |                         | -56 | -44 | 16  |
|  |                  |    |             |                                    |                         | -34 | -72 | 8   |
|  |                  |    |             |                                    |                         | -30 | -78 | -4  |
|  |                  |    |             |                                    |                         | 36  | -62 | -10 |
|  |                  |    |             |                                    |                         | 28  | -70 | -14 |
|  | Liu et al., 2008 | 16 | written & s | Semantic association /rhyme judger | Phonological > Semantic | -48 | 2   | 24  |
|  |                  |    |             |                                    |                         | -36 | -40 | 28  |
|  |                  |    |             |                                    |                         | -38 | 38  | 16  |

|  |                           |    |            |                                   |                             |     |     |     |
|--|---------------------------|----|------------|-----------------------------------|-----------------------------|-----|-----|-----|
|  | Lurito et al., 2000       | 5  | Words      | Rhyme judgement                   | Phonology > orthography     | -48 | 38  | 21  |
|  |                           |    |            |                                   |                             | -52 | 16  | 31  |
|  |                           |    |            |                                   |                             | -58 | 16  | 3   |
|  |                           |    |            |                                   |                             | -67 | -29 | 29  |
|  |                           |    |            |                                   |                             | -60 | -48 | 2   |
|  |                           |    |            |                                   |                             | -47 | -63 | -18 |
|  |                           |    |            |                                   |                             | 61  | 10  | 0   |
|  | McDermott et al., 2003    | 20 | written wd | Rhyme judgement / Semantic associ | Phonology > Semantic        | -58 | 6   | 13  |
|  |                           |    |            |                                   |                             | 48  | -35 | 49  |
|  |                           |    |            |                                   |                             | -32 | -54 | 55  |
|  |                           |    |            |                                   |                             | 35  | -44 | 56  |
|  |                           |    |            |                                   |                             | 48  | -63 | -6  |
|  | Mummery et al., 1998      | 10 | Words      | Phonological > Semantic           | Phonological > Semantic     | 35  | 19  | -25 |
|  |                           |    |            |                                   |                             | 31  | 10  | -31 |
|  |                           |    |            |                                   |                             | -5  | -57 | 15  |
|  |                           |    |            |                                   |                             | -5  | 15  | 7   |
|  | Paulescu et al., 1997     | 5  | written wd | Phonological Fluency              | Phonological > Semantic flu | -38 | 10  | 18  |
|  | Price et al., 1997        | 6  | Words      | Phonological > Semantic           | Phonological > Semantic     | -3  | 9   | 4   |
|  |                           |    |            |                                   |                             | -42 | -44 | 36  |
|  |                           |    |            |                                   |                             | 38  | -48 | 40  |
|  |                           |    |            |                                   |                             | 45  | -30 | 42  |
|  |                           |    |            |                                   |                             | 32  | -61 | 37  |
|  |                           |    |            |                                   |                             | -55 | 2   | 23  |
|  |                           |    |            |                                   |                             | -13 | -82 | 26  |
|  | Roskies et al., 2001      | 20 | Words      | Phonological > Semantic           | Phonological > Semantic     | 9   | -72 | -27 |
|  |                           |    |            |                                   |                             | -26 | 28  | -2  |
|  |                           |    |            |                                   |                             | -2  | -8  | 3   |
|  |                           |    |            |                                   |                             | -37 | -76 | -19 |
|  |                           |    |            |                                   |                             | -39 | -1  | 5   |
|  |                           |    |            |                                   |                             | -52 | 3   | 25  |
|  |                           |    |            |                                   |                             | -52 | 6   | 14  |
|  |                           |    |            |                                   |                             | -58 | -7  | 40  |
|  |                           |    |            |                                   |                             | 18  | -6  | 14  |
|  |                           |    |            |                                   |                             | 32  | -72 | -20 |
|  |                           |    |            |                                   |                             | 34  | -68 | -31 |
|  |                           |    |            |                                   |                             | 7   | -70 | 4   |
|  | Scott, Leff and Wise 2003 | 9  | written wd | Three syllables or not?           | Phonological decision > Hur | -60 | -26 | 39  |
|  |                           |    |            |                                   |                             | -48 | -51 | 60  |

|  |                      |    |                     |                                      |                                    |     |     |    |
|--|----------------------|----|---------------------|--------------------------------------|------------------------------------|-----|-----|----|
|  |                      |    |                     |                                      |                                    | -20 | -67 | 58 |
|  |                      |    |                     |                                      |                                    | 25  | 7   | 48 |
|  |                      |    |                     |                                      |                                    | 49  | -48 | 55 |
|  |                      |    |                     |                                      |                                    | 11  | -73 | 62 |
|  |                      |    |                     |                                      |                                    | 30  | -59 | 41 |
|  | Seghier et al., 2004 | 30 | written words       | Rhyme detection > Semantic category  | Phonology > Semantics              | -40 | -54 | 19 |
|  |                      |    |                     |                                      |                                    | -27 | 51  | 27 |
|  |                      |    |                     |                                      |                                    | -54 | -35 | 40 |
|  |                      |    |                     |                                      |                                    | -22 | -77 | 55 |
|  |                      |    |                     |                                      |                                    | -7  | 5   | 58 |
|  | Simon et al., 2002   | 10 | Words               | Phonological detection               | Phonology > orthography            | -4  | 12  | 56 |
|  |                      |    |                     |                                      |                                    | -56 | 20  | 32 |
|  |                      |    |                     |                                      |                                    | -44 | 16  | 12 |
|  |                      |    |                     |                                      |                                    | 52  | 16  | 8  |
|  |                      |    |                     |                                      |                                    | -52 | 0   | 48 |
|  |                      |    |                     |                                      |                                    | -64 | -36 | 36 |
|  |                      |    |                     |                                      |                                    | -28 | -80 | 40 |
|  | Simon et al., 2004   | 10 | Words/numbers       | Phoneme detection/number calculation | Phoneme and calculation comparison | -48 | 20  | 0  |
|  |                      |    |                     |                                      |                                    | -58 | 6   | 20 |
|  |                      |    |                     |                                      |                                    | -42 | 26  | 20 |
|  |                      |    |                     |                                      |                                    | -50 | 18  | 28 |
|  |                      |    |                     |                                      |                                    | -46 | 9   | 44 |
|  |                      |    |                     |                                      |                                    | -2  | -26 | 44 |
|  |                      |    |                     |                                      |                                    | -28 | -72 | 44 |
|  |                      |    |                     |                                      |                                    | 50  | 21  | 4  |
|  |                      |    |                     |                                      |                                    | 6   | 29  | 48 |
|  | Specht et al., 2003  | 15 | Words, pseudo-words | Pseudo-word/tone detection task      | Pseudo-word > tones                | -64 | -24 | 4  |
|  |                      |    |                     |                                      |                                    | 60  | -12 | 0  |
|  |                      |    |                     |                                      |                                    | 4   | 40  | 40 |
|  |                      |    |                     |                                      |                                    | 36  | 24  | -8 |
|  |                      |    |                     |                                      |                                    | -28 | 20  | -4 |
|  |                      |    |                     |                                      |                                    | -8  | 36  | 28 |
|  | Tyler et al., 2005   | 18 | Words               | Phonological similarity judgment     | Regular > irregular                | -46 | -26 | 8  |
|  |                      |    |                     |                                      |                                    | -56 | -24 | 10 |
|  |                      |    |                     |                                      |                                    | -56 | -48 | 8  |
|  |                      |    |                     |                                      |                                    | 58  | -14 | 2  |
|  |                      |    |                     |                                      |                                    | 58  | -28 | 4  |
|  |                      |    |                     |                                      |                                    | 62  | -6  | 10 |



|                                  |                                  |    |             |                                      |                               |     |     |     |
|----------------------------------|----------------------------------|----|-------------|--------------------------------------|-------------------------------|-----|-----|-----|
|                                  |                                  |    |             |                                      |                               | -46 | 12  | 28  |
|                                  |                                  |    |             |                                      |                               | -34 | -64 | 46  |
|                                  | Zahn et al., 2004                | 14 | Words and   | Word discrimination                  | Phonological and lexical cor  | -40 | 20  | 28  |
|                                  |                                  |    |             |                                      |                               | -36 | -64 | 42  |
|                                  |                                  |    |             |                                      |                               | -52 | -16 | -14 |
|                                  |                                  |    |             |                                      |                               | -56 | -8  | 28  |
|                                  |                                  |    |             |                                      |                               | 44  | -8  | 42  |
|                                  |                                  |    |             |                                      |                               | 8   | -76 | 0   |
| <b>Sentence-level processing</b> | Bottini et al., 1994             | 6  | written sen | Sentence plausible or not            | Metaphor > literal meaning    | 38  | 11  | 47  |
|                                  |                                  |    |             |                                      |                               | 44  | 32  | 0   |
|                                  |                                  |    |             |                                      |                               | -1  | 47  | 0   |
|                                  |                                  |    |             |                                      |                               | 62  | -39 | -2  |
|                                  |                                  |    |             |                                      |                               | 21  | -38 | 30  |
|                                  |                                  |    |             |                                      |                               | 21  | -62 | 24  |
|                                  | Boulenger et al., 2009           | 18 | written sen | Sentence verification. Does a subseq | Idioms > Literal meaning      | -48 | 28  | 6   |
|                                  |                                  |    |             |                                      |                               | -58 | 16  | 10  |
|                                  |                                  |    |             |                                      |                               | -44 | 30  | 2   |
|                                  |                                  |    |             |                                      |                               | -56 | 20  | 26  |
|                                  |                                  |    |             |                                      |                               | -62 | -56 | 6   |
|                                  |                                  |    |             |                                      |                               | 20  | -82 | -32 |
|                                  | Caplan et al., 2003              | 13 | Sentences   | Plausibility judgement               | Object relative clause > Sub  | -2  | -53 | 55  |
|                                  |                                  |    |             |                                      |                               | 10  | 23  | 47  |
|                                  | Chen, Widick and Chatterjee 2008 | 14 | written sen | Sentence plausible or not            | Predicate metaphor > litera   | -56 | 21  | 2   |
|                                  |                                  |    |             |                                      |                               | -53 | 6   | -33 |
|                                  |                                  |    |             |                                      |                               | -56 | -10 | -19 |
|                                  |                                  |    |             |                                      |                               | -66 | -38 | 8   |
|                                  |                                  |    |             |                                      |                               | -44 | -56 | 39  |
|                                  |                                  |    |             |                                      |                               | 58  | -2  | -33 |
|                                  | Collette et al., 2001            | 12 | written sen | Sentence completion                  | Inappropriate > appropriate   | -33 | 21  | 27  |
|                                  |                                  |    |             |                                      |                               | -40 | 48  | -13 |
|                                  |                                  |    |             |                                      |                               | -55 | 24  | 14  |
|                                  |                                  |    |             |                                      |                               | -46 | 25  | 18  |
|                                  | Constable et al., 2004           | 20 | Sentences   | Plausibility judgement               | Object > subject relative cla | -65 | -50 | 8   |
|                                  |                                  |    |             |                                      |                               | -63 | -33 | 3   |
|                                  |                                  |    |             |                                      |                               | -48 | 38  | -4  |
|                                  |                                  |    |             |                                      |                               | -60 | -53 | 22  |
|                                  |                                  |    |             |                                      |                               | -5  | -51 | 38  |
|                                  | de Diego Balaguer et al., 2006   | 12 | Non-words   | Generate the present tense           | Nonword inflection > repeti   | -48 | 16  | 12  |

|  |                        |    |             |                                       |                             |     |     |     |
|--|------------------------|----|-------------|---------------------------------------|-----------------------------|-----|-----|-----|
|  |                        |    |             |                                       |                             | -12 | -52 | -32 |
|  |                        |    |             |                                       |                             | 28  | -24 | 56  |
|  | Eviatar and Just 2006  | 16 | written ser | stories followed by yes no comprehe   | Metaphor > Literal and Iron | -45 | 21  | 15  |
|  |                        |    |             |                                       |                             | -52 | -53 | 9   |
|  |                        |    |             |                                       |                             | -26 | -77 | 8   |
|  |                        |    |             |                                       |                             | 48  | -61 | 3   |
|  | Fiebach et al., 2005   | 14 | Sentences   | Probe questions                       | Long prepositional phrase > | -20 | -52 | 26  |
|  |                        |    |             |                                       |                             | 22  | -59 | 23  |
|  |                        |    |             |                                       |                             | -13 | -63 | 50  |
|  | Grossman et al., 2002  | 24 | Sentences   | Who is the agent?                     | Object > subject relatives) | -47 | 19  | -1  |
|  |                        |    |             |                                       |                             | -7  | -71 | 47  |
|  |                        |    |             |                                       |                             | 35  | 22  | -21 |
|  |                        |    |             |                                       |                             | 62  | -43 | 21  |
|  | Haller et al., 2007    | 20 | Sentences   | Is meaning reversed?                  | Complex > medium            | -2  | -67 | 9   |
|  |                        |    |             |                                       |                             | -42 | 10  | 43  |
|  |                        |    |             |                                       |                             | 0   | 11  | 59  |
|  |                        |    |             |                                       |                             | -55 | -39 | 13  |
|  |                        |    |             |                                       |                             | 35  | 1   | 59  |
|  |                        |    |             |                                       |                             | 47  | 21  | 33  |
|  |                        |    |             |                                       |                             | -32 | 29  | 9   |
|  |                        |    |             |                                       |                             | -58 | -3  | -5  |
|  |                        |    |             |                                       |                             | 36  | 32  | 7   |
|  |                        |    |             |                                       |                             | 34  | -49 | 43  |
|  | Hoenig and Scheef 2009 | 22 | written ser | Context verification /semantic relate | Ambiguous > unambiguous     | -26 | 8   | -26 |
|  |                        |    |             |                                       |                             | -6  | 46  | 38  |
|  |                        |    |             |                                       |                             | -46 | -62 | 38  |
|  |                        |    |             |                                       |                             | -14 | 20  | 54  |
|  |                        |    |             |                                       |                             | -8  | -64 | 22  |
|  |                        |    |             |                                       |                             | -36 | 10  | 44  |
|  |                        |    |             |                                       |                             | 20  | 38  | 44  |
|  |                        |    |             |                                       |                             | 54  | -64 | 40  |
|  |                        |    |             |                                       |                             | 28  | -14 | -34 |
|  |                        |    |             |                                       |                             | -2  | 42  | -6  |
|  |                        |    |             |                                       |                             | 32  | 22  | -26 |
|  |                        |    |             |                                       |                             | -44 | 10  | -40 |
|  |                        |    |             |                                       |                             | -6  | 48  | 8   |
|  |                        |    |             |                                       |                             | -54 | -60 | 36  |
|  |                        |    |             |                                       |                             | -34 | 10  | 46  |

|  |                         |    |           |                              |                              |     |     |     |
|--|-------------------------|----|-----------|------------------------------|------------------------------|-----|-----|-----|
|  | Homae et al., 2002      | 9  | Sentences | Probe detection              | Auditory Phrases > nonword   | -57 | 27  | 6   |
|  |                         |    |           |                              |                              | 57  | 21  | 9   |
|  |                         |    |           |                              |                              | -45 | 39  | 24  |
|  |                         |    |           |                              |                              | -39 | 60  | -9  |
|  |                         |    |           |                              |                              | 45  | 51  | -9  |
|  |                         |    |           |                              |                              | -27 | 18  | 51  |
|  |                         |    |           |                              |                              | 30  | 18  | 48  |
|  |                         |    |           |                              |                              | 48  | 15  | 36  |
|  |                         |    |           |                              |                              | -30 | 15  | 12  |
|  |                         |    |           |                              |                              | 45  | -3  | 9   |
|  |                         |    |           |                              |                              | -60 | -12 | -12 |
|  |                         |    |           |                              |                              | 57  | -18 | -9  |
|  |                         |    |           |                              |                              | -54 | -36 | -3  |
|  |                         |    |           |                              |                              | 60  | -39 | -12 |
|  |                         |    |           |                              |                              | -48 | -69 | 21  |
|  |                         |    |           |                              |                              | -45 | -54 | 54  |
|  |                         |    |           |                              |                              | 48  | -69 | 33  |
|  |                         |    |           |                              |                              | 63  | -21 | 21  |
|  |                         |    |           |                              |                              | 6   | -18 | 48  |
|  |                         |    |           |                              |                              | -3  | -36 | 36  |
|  |                         |    |           |                              |                              | -9  | -81 | 33  |
|  |                         |    |           |                              |                              | -3  | -72 | 24  |
|  | Humphries et al., 2005  | 12 | Sentences | Passive                      | Sentences > word lists (degr | 54  | -23 | -7  |
|  |                         |    |           |                              |                              | -59 | -18 | -1  |
|  | Humphries et al., 2006  | 21 | Sentences | Meaningfulness judgement     | Interaction ((congruent sen  | -66 | -24 | 8   |
|  |                         |    |           |                              |                              | -54 | 10  | -8  |
|  |                         |    |           |                              |                              | 54  | -9  | -28 |
|  |                         |    |           |                              |                              | 66  | -31 | -8  |
|  |                         |    |           |                              |                              | -54 | -57 | 24  |
|  | Kristensen et al., 2013 | 24 | Sentences | Sensicality judgement        | Prosody x congruency intera  | 24  | -58 | 60  |
|  |                         |    |           |                              |                              | 42  | -48 | 48  |
|  |                         |    |           |                              |                              | 40  | -38 | 44  |
|  |                         |    |           |                              |                              | -30 | -54 | 58  |
|  |                         |    |           |                              |                              | -40 | -46 | 56  |
|  | Longe et al., 2007      | 12 | Word-stem | Pleasant/unpleasant judgment | Inflected nouns > noun stem  | -16 | -70 | 36  |
|  |                         |    |           |                              |                              | -14 | -69 | 24  |
|  |                         |    |           |                              |                              | -26 | -61 | 34  |
|  |                         |    |           |                              |                              | -50 | -62 | 2   |



|  |                        |    |                   |                                          |                                      |     |     |     |
|--|------------------------|----|-------------------|------------------------------------------|--------------------------------------|-----|-----|-----|
|  | Mashal et al., 2009    | 15 | written sentences | Is sentence positive or negative         | Novel metaphoric > Nonsense          | -49 | -38 | 28  |
|  |                        |    |                   |                                          |                                      | -49 | -6  | -14 |
|  |                        |    |                   |                                          |                                      | -57 | -42 | -1  |
|  |                        |    |                   |                                          |                                      | -9  | -49 | 33  |
|  |                        |    |                   |                                          |                                      | -42 | 19  | 25  |
|  |                        |    |                   |                                          |                                      | -57 | -43 | 25  |
|  | Mason and Just 2007    | 12 | written sentences | yes no judgement on a sentence           | Semantic ambiguity > nonambiguity    | -28 | 12  | 16  |
|  |                        |    |                   |                                          |                                      | 24  | 16  | 12  |
|  |                        |    |                   |                                          |                                      | 26  | 46  | 16  |
|  |                        |    |                   |                                          |                                      | -8  | 18  | 6   |
|  |                        |    |                   |                                          |                                      | 12  | 18  | 8   |
|  |                        |    |                   |                                          |                                      | -20 | 54  | 18  |
|  |                        |    |                   |                                          |                                      | 34  | 30  | 6   |
|  |                        |    |                   |                                          |                                      | 24  | 46  | 16  |
|  |                        |    |                   |                                          |                                      | -16 | 46  | 14  |
|  |                        |    |                   |                                          |                                      | -52 | 26  | 12  |
|  |                        |    |                   |                                          |                                      | 24  | 12  | 10  |
|  |                        |    |                   |                                          |                                      | -12 | 20  | 12  |
|  |                        |    |                   |                                          |                                      | -24 | 22  | 2   |
|  |                        |    |                   |                                          |                                      | -22 | -28 | 0   |
|  |                        |    |                   |                                          |                                      | 46  | 18  | 10  |
|  |                        |    |                   |                                          |                                      | -12 | -12 | 10  |
|  |                        |    |                   |                                          |                                      | 42  | 12  | -8  |
|  |                        |    |                   |                                          |                                      | -40 | 14  | -6  |
|  |                        |    |                   |                                          |                                      | -42 | 26  | -2  |
|  | Moss et al., 2005      | 15 | written sentences | Naming from definition (prime) / picture | Competition > Repetition             | -40 | 24  | -15 |
|  |                        |    |                   |                                          |                                      | -40 | 33  | 13  |
|  |                        |    |                   |                                          |                                      | -49 | 40  | 15  |
|  | Newman et al., 2010    | 14 | Sentences         | Target detection                         | Word order > inflectional morphology | 58  | 24  | 12  |
|  |                        |    |                   |                                          |                                      | -34 | 18  | 38  |
|  |                        |    |                   |                                          |                                      | 46  | 16  | 42  |
|  |                        |    |                   |                                          |                                      | -38 | -64 | 40  |
|  |                        |    |                   |                                          |                                      | -58 | -36 | -10 |
|  | Nieuwland et al., 2007 | 22 | Sentences         | Passive                                  | Referential ambiguity > coherence    | -6  | 66  | -2  |
|  |                        |    |                   |                                          |                                      | 2   | 64  | 20  |
|  |                        |    |                   |                                          |                                      | 28  | 28  | 44  |
|  |                        |    |                   |                                          |                                      | -6  | -62 | 30  |
|  |                        |    |                   |                                          |                                      | -10 | -64 | 44  |

|  |                                   |    |             |                                 |                                 |     |     |     |
|--|-----------------------------------|----|-------------|---------------------------------|---------------------------------|-----|-----|-----|
|  |                                   |    |             |                                 |                                 | -2  | -64 | 48  |
|  |                                   |    |             |                                 |                                 | -50 | -68 | 30  |
|  |                                   |    |             |                                 |                                 | 50  | -62 | 30  |
|  | Obleser and Kotz., 2010           | 16 | Sentences   | Passive                         | Positive correlation with int   | 62  | -6  | -4  |
|  |                                   |    |             |                                 |                                 | -60 | -8  | -6  |
|  |                                   |    |             |                                 |                                 | -46 | -64 | 38  |
|  | Obleser et al., 2007              | 16 | Sentences   | Passive                         | Intelligibility effect but only | -50 | -60 | 34  |
|  |                                   |    |             |                                 |                                 | -20 | 39  | 44  |
|  |                                   |    |             |                                 |                                 | 4   | 56  | 27  |
|  |                                   |    |             |                                 |                                 | -40 | 24  | -18 |
|  |                                   |    |             |                                 |                                 | -4  | -56 | 12  |
|  | Opitz et al., 2007                | 24 | Sentences   | Target detection                | Local violation > correct sen   | -27 | -23 | -19 |
|  |                                   |    |             |                                 |                                 | 26  | -11 | -21 |
|  |                                   |    |             |                                 |                                 | -59 | -19 | 37  |
|  |                                   |    |             |                                 |                                 | -56 | -36 | 27  |
|  |                                   |    |             |                                 |                                 | -66 | -34 | 13  |
|  |                                   |    |             |                                 |                                 | 65  | -27 | 14  |
|  |                                   |    |             |                                 |                                 | 37  | 8   | -26 |
|  |                                   |    |             |                                 |                                 | -37 | -10 | -10 |
|  |                                   |    |             |                                 |                                 | 42  | -6  | -11 |
|  |                                   |    |             |                                 |                                 | 29  | 10  | -9  |
|  | Peelle, Troiani and Grossman 2009 | 25 | written sen | Sequential feature verification | Complex nouns: Inconsister      | -44 | -66 | 30  |
|  |                                   |    |             |                                 |                                 | -50 | -18 | -14 |
|  |                                   |    |             |                                 |                                 | 0   | -40 | 40  |
|  |                                   |    |             |                                 |                                 | 44  | -68 | 34  |
|  |                                   |    |             |                                 |                                 | 60  | 2   | 18  |
|  |                                   |    |             |                                 |                                 | -32 | 58  | 6   |
|  |                                   |    |             |                                 |                                 | 0   | 48  | -6  |
|  |                                   |    |             |                                 |                                 | -48 | 30  | 18  |
|  |                                   |    |             |                                 |                                 | -48 | 30  | 18  |
|  |                                   |    |             |                                 |                                 | -48 | 38  | -14 |
|  |                                   |    |             |                                 |                                 | 30  | 58  | 2   |
|  |                                   |    |             |                                 |                                 | 2   | -30 | 40  |
|  |                                   |    |             |                                 |                                 | -4  | -66 | 30  |
|  |                                   |    |             |                                 |                                 | -52 | -16 | -20 |
|  |                                   |    |             |                                 |                                 | -42 | -68 | 30  |
|  |                                   |    |             |                                 |                                 | 0   | -26 | 30  |
|  |                                   |    |             |                                 |                                 | 40  | -62 | 48  |

|  |                       |    |              |                                      |                            |     |     |     |
|--|-----------------------|----|--------------|--------------------------------------|----------------------------|-----|-----|-----|
|  |                       |    |              |                                      |                            | 10  | -50 | 10  |
|  |                       |    |              |                                      |                            | -48 | -38 | -8  |
|  | Rapp et al., 2004     | 15 | written se   | positive or negative connotation o s | Metaphor > literal meaning | -41 | 39  | -7  |
|  |                       |    |              |                                      |                            | -48 | -9  | -36 |
|  |                       |    |              |                                      |                            | -56 | -61 | 0   |
|  | Rodd et al., 2005     | 15 | auditory se  | Ambiguity resolution /semantic rela  | Ambiguous > unambiguous    | -50 | -48 | -10 |
|  |                       |    |              |                                      |                            | -52 | 28  | 20  |
|  |                       |    |              |                                      |                            | 52  | 34  | 14  |
|  |                       |    |              |                                      |                            | 52  | 22  | 12  |
|  |                       |    |              |                                      |                            | -56 | -56 | 0   |
|  |                       |    |              |                                      |                            | -64 | -48 | -2  |
|  |                       |    |              |                                      |                            | -38 | -40 | -15 |
|  |                       |    |              |                                      |                            | -40 | 12  | 32  |
|  |                       |    |              |                                      |                            | 32  | 26  | 2   |
|  | Shibata et al., 2007  | 13 | written se   | understand the sentence? Yes or no   | Metaphor > literal meaning | -48 | -48 | 45  |
|  |                       |    |              |                                      |                            | -3  | 58  | 22  |
|  |                       |    |              |                                      |                            | 1   | 59  | 13  |
|  |                       |    |              |                                      |                            | 1   | 68  | 4   |
|  |                       |    |              |                                      |                            | -44 | 28  | 9   |
|  | Skosnik et al., 2002  | 23 | Letter strir | Artificial grammar learning          | AGL correct > incorrect    | 49  | -57 | 42  |
|  |                       |    |              |                                      |                            | -24 | 30  | 52  |
|  |                       |    |              |                                      |                            | -52 | -57 | 41  |
|  |                       |    |              |                                      |                            | -44 | -76 | 45  |
|  |                       |    |              |                                      |                            | 2   | -62 | 46  |
|  | Snijders et al., 2009 | 28 | Words/Ser    | Visual catch trials                  | Sentence > words           | -54 | 18  | -30 |
|  |                       |    |              |                                      |                            | -56 | -6  | -16 |
|  |                       |    |              |                                      |                            | -62 | -44 | -2  |
|  |                       |    |              |                                      |                            | -52 | 34  | -8  |
|  |                       |    |              |                                      |                            | -58 | -56 | 12  |
|  |                       |    |              |                                      |                            | -58 | 22  | 12  |
|  |                       |    |              |                                      |                            | -44 | -58 | 18  |
|  |                       |    |              |                                      |                            | -26 | -6  | -20 |
|  |                       |    |              |                                      |                            | -44 | -16 | -30 |
|  |                       |    |              |                                      |                            | -26 | -36 | -26 |
|  |                       |    |              |                                      |                            | -18 | 2   | 4   |
|  |                       |    |              |                                      |                            | 54  | 20  | -32 |
|  |                       |    |              |                                      |                            | 56  | 8   | -26 |
|  |                       |    |              |                                      |                            | 52  | -14 | -16 |

|  |                          |    |             |                                     |                            |     |     |     |
|--|--------------------------|----|-------------|-------------------------------------|----------------------------|-----|-----|-----|
|  |                          |    |             |                                     |                            | 62  | -42 | 0   |
|  |                          |    |             |                                     |                            | 56  | 36  | -10 |
|  |                          |    |             |                                     |                            | 60  | 34  | 4   |
|  |                          |    |             |                                     |                            | 62  | 28  | 10  |
|  |                          |    |             |                                     |                            | -4  | 54  | -20 |
|  |                          |    |             |                                     |                            | -8  | 60  | 28  |
|  |                          |    |             |                                     |                            | -38 | -2  | -50 |
|  |                          |    |             |                                     |                            | -6  | -62 | 2   |
|  |                          |    |             |                                     |                            | -12 | -46 | 34  |
|  |                          |    |             |                                     |                            | 30  | -32 | -32 |
|  | Stringgaris et al., 2007 | 11 | written sen | Sentence plausible or not           | Metaphor > literal meaning | -30 | -64 | -30 |
|  |                          |    |             |                                     |                            | 16  | -86 | -11 |
|  |                          |    |             |                                     |                            | -6  | -14 | 1   |
|  |                          |    |             |                                     |                            | -46 | 32  | -9  |
|  |                          |    |             |                                     |                            | 36  | -68 | 18  |
|  |                          |    |             |                                     |                            | -21 | -83 | 26  |
|  |                          |    |             |                                     |                            | 29  | -66 | 29  |
|  |                          |    |             |                                     |                            | -54 | -7  | 37  |
|  |                          |    |             |                                     |                            | -29 | -57 | 49  |
|  | Tyler et al., 2008       | 15 | Word-stem   | Pleasant/unpleasant judgment        | Verb phrases > (noun and v | 30  | -88 | 6   |
|  |                          |    |             |                                     |                            | -46 | -36 | -6  |
|  |                          |    |             |                                     |                            | -52 | 18  | 28  |
|  |                          |    |             |                                     |                            | -12 | -48 | 40  |
|  |                          |    |             |                                     |                            | -2  | -76 | 22  |
|  | Yokoyama et al., 2006    | 36 | Sentences   | Semantic plausibility judgment      | Passive > active           | -28 | -74 | 46  |
|  |                          |    |             |                                     |                            | -52 | 34  | 14  |
|  |                          |    |             |                                     |                            | -52 | 20  | 30  |
|  |                          |    |             |                                     |                            | -32 | 18  | -4  |
|  | Yokoyama et al., 2007    | 20 | Sentences   | Probe questions                     | Passive > active           | -62 | 0   | 3   |
|  |                          |    |             |                                     |                            | -50 | -62 | 54  |
|  | Zemplini et al., 2007a   | 15 | written sen | Ambiguity resolution /semantic rela | Ambiguous > unambiguous    | -48 | 26  | 20  |
|  |                          |    |             |                                     |                            | -52 | 16  | 26  |
|  |                          |    |             |                                     |                            | 34  | 20  | -10 |
|  |                          |    |             |                                     |                            | -50 | -48 | -12 |
|  |                          |    |             |                                     |                            | 56  | -34 | -16 |
|  | Zemplini et al., 2007b   | 15 | written sen | semantic relatedness                | Figurative > Literal       | -54 | 32  | -12 |
|  |                          |    |             |                                     |                            | -56 | 28  | -4  |
|  |                          |    |             |                                     |                            | -53 | 22  | 15  |

|                           |                       |    |         |                               |       |     |     |     |
|---------------------------|-----------------------|----|---------|-------------------------------|-------|-----|-----|-----|
|                           |                       |    |         |                               |       | 58  | 23  | -15 |
|                           |                       |    |         |                               |       | -60 | -43 | -6  |
|                           |                       |    |         |                               |       | -61 | -35 | -9  |
|                           |                       |    |         |                               |       | 58  | -27 | -16 |
|                           |                       |    |         |                               |       | 65  | -27 | -11 |
| <b>Top-down attention</b> | Arrington et al. 2000 | 12 | Object  | Object-based cuing            |       | -31 | -32 | 45  |
|                           |                       |    |         |                               |       | -41 | -22 | 57  |
|                           |                       |    |         |                               |       | -66 | -34 | 6   |
|                           |                       |    |         |                               |       | -47 | -27 | -25 |
|                           |                       |    |         |                               |       | -16 | -34 | -5  |
|                           |                       |    |         |                               |       | -16 | 43  | 32  |
|                           |                       |    |         |                               |       | 2   | 45  | -18 |
|                           |                       |    |         |                               |       | -33 | 41  | -7  |
|                           | Corbetta et al. 1998  | 6  | Spatial | Peripheral attention shifting |       | 42  | -41 | 55  |
|                           |                       |    |         |                               |       | 18  | -64 | 62  |
|                           |                       |    |         |                               |       | 33  | -75 | 34  |
|                           |                       |    |         |                               |       | 40  | 1   | 46  |
|                           |                       |    |         |                               |       | 50  | 0   | 37  |
|                           |                       |    |         |                               |       | 33  | 2   | 55  |
|                           |                       |    |         |                               |       | 1   | 10  | 53  |
|                           |                       |    |         |                               |       | 5   | -4  | 65  |
|                           |                       |    |         |                               |       | 37  | 50  | 17  |
|                           |                       |    |         |                               |       | 52  | 9   | 16  |
|                           |                       |    |         |                               |       | 39  | 12  | 7   |
|                           |                       |    |         |                               |       | -32 | 23  | 5   |
|                           |                       |    |         |                               |       | 65  | -50 | 6   |
|                           |                       |    |         |                               |       | 48  | -69 | 8   |
|                           |                       |    |         |                               |       | 18  | -99 | 14  |
|                           |                       |    |         |                               |       | -23 | -98 | 23  |
|                           | Corbetta et al. 2000  | 13 | Spatial | Posner cueing                 | Cue   | -25 | -65 | 56  |
|                           |                       |    |         |                               |       | -25 | -54 | 53  |
|                           |                       |    |         |                               |       | -23 | -67 | 38  |
|                           |                       |    |         |                               |       | -27 | -76 | 33  |
|                           |                       |    |         |                               |       | 31  | -56 | 59  |
|                           |                       |    |         |                               |       | 25  | -62 | 59  |
|                           |                       |    |         |                               |       | 33  | -72 | 27  |
|                           |                       |    |         |                               |       | 56  | -56 | 5   |
|                           | Corbetta et al. 2002  | 13 | Spatial | Posner cueing                 | Delay | -26 | -57 | -19 |

|  |                   |    |         |               |                             |     |     |     |
|--|-------------------|----|---------|---------------|-----------------------------|-----|-----|-----|
|  |                   |    |         |               |                             | 30  | -54 | -15 |
|  |                   |    |         |               |                             | 35  | -69 | -16 |
|  |                   |    |         |               |                             | -49 | -72 | 8   |
|  |                   |    |         |               |                             | 50  | -66 | 15  |
|  |                   |    |         |               |                             | -36 | -89 | 5   |
|  |                   |    |         |               |                             | 37  | -91 | 8   |
|  |                   |    |         |               |                             | -2  | -72 | 21  |
|  |                   |    |         |               |                             | 5   | -84 | 13  |
|  |                   |    |         |               |                             | 22  | -84 | 30  |
|  |                   |    |         |               |                             | -6  | -70 | 0   |
|  |                   |    |         |               |                             | 11  | -75 | -6  |
|  |                   |    |         |               |                             | -28 | -79 | 24  |
|  |                   |    |         |               |                             | 35  | -76 | 23  |
|  |                   |    |         |               |                             | -25 | -53 | 48  |
|  |                   |    |         |               |                             | 31  | -47 | 42  |
|  |                   |    |         |               |                             | 38  | -59 | 52  |
|  |                   |    |         |               |                             | 63  | -39 | 32  |
|  |                   |    |         |               |                             | 12  | -68 | 45  |
|  |                   |    |         |               |                             | -2  | -80 | 32  |
|  |                   |    |         |               |                             | 57  | -19 | 41  |
|  |                   |    |         |               |                             | 48  | -32 | 61  |
|  |                   |    |         |               |                             | 61  | -41 | 12  |
|  |                   |    |         |               |                             | 52  | -39 | 7   |
|  |                   |    |         |               |                             | -19 | -60 | -7  |
|  |                   |    |         |               |                             | -67 | -9  | 13  |
|  |                   |    |         |               |                             | 46  | 4   | 30  |
|  |                   |    |         |               |                             | -43 | -12 | 31  |
|  |                   |    |         |               |                             | 32  | 18  | 2   |
|  |                   |    |         |               |                             | -32 | 18  | 3   |
|  |                   |    |         |               |                             | 37  | 29  | 26  |
|  |                   |    |         |               |                             | -39 | 31  | -16 |
|  |                   |    |         |               |                             | 27  | 11  | 57  |
|  |                   |    |         |               |                             | 61  | -9  | 29  |
|  |                   |    |         |               |                             | 38  | -25 | 65  |
|  | Hahn et al., 2006 | 23 | Spatial | Posner cueing | Cue predictability increase | -31 | -52 | 47  |
|  |                   |    |         |               |                             | -35 | -48 | 58  |
|  |                   |    |         |               |                             | -45 | -32 | 44  |
|  |                   |    |         |               |                             | 3   | -60 | 53  |

|  |                       |    |         |                                    |                       |     |     |     |
|--|-----------------------|----|---------|------------------------------------|-----------------------|-----|-----|-----|
|  |                       |    |         |                                    |                       | -24 | 5   | 53  |
|  |                       |    |         |                                    |                       | 26  | 2   | 50  |
|  |                       |    |         |                                    |                       | -40 | 31  | 33  |
|  |                       |    |         |                                    |                       | -32 | -91 | 9   |
|  |                       |    |         |                                    |                       | 30  | 98  | -19 |
|  | Hill et al., 2010     | 16 | Spatial | Cue to attend to pitch or location | cue (location) > rest | -18 | -74 | 54  |
|  |                       |    |         |                                    |                       | -34 | -50 | 48  |
|  |                       |    |         |                                    |                       | -30 | -6  | 54  |
|  |                       |    |         |                                    |                       | 24  | -8  | 54  |
|  |                       |    |         |                                    |                       | -40 | 2   | 34  |
|  |                       |    |         |                                    |                       | -58 | -58 | -12 |
|  |                       |    |         |                                    |                       | -4  | 8   | 64  |
|  |                       |    |         |                                    |                       | -38 | -52 | 48  |
|  |                       |    |         |                                    |                       | -12 | -72 | 56  |
|  |                       |    |         |                                    |                       | -46 | 16  | 28  |
|  |                       |    |         |                                    |                       | -32 | -2  | 62  |
|  | Hopfinger et al. 2000 | 6  | Spatial | Posner cueing                      | Cue > target          | -16 | 48  | 36  |
|  |                       |    |         |                                    |                       | -52 | 32  | 16  |
|  |                       |    |         |                                    |                       | -32 | 16  | 48  |
|  |                       |    |         |                                    |                       | 20  | 8   | 48  |
|  |                       |    |         |                                    |                       | -12 | -56 | 56  |
|  |                       |    |         |                                    |                       | 8   | -40 | 56  |
|  |                       |    |         |                                    |                       | -44 | -64 | 32  |
|  |                       |    |         |                                    |                       | -44 | -48 | 32  |
|  |                       |    |         |                                    |                       | 44  | -60 | 36  |
|  |                       |    |         |                                    |                       | 36  | -44 | 32  |
|  |                       |    |         |                                    |                       | 0   | -40 | 44  |
|  |                       |    |         |                                    |                       | 4   | -44 | 32  |
|  |                       |    |         |                                    |                       | -56 | -24 | 8   |
|  |                       |    |         |                                    |                       | 48  | -12 | 8   |
|  |                       |    |         |                                    |                       | -36 | -76 | 4   |
|  |                       |    |         |                                    |                       | 28  | -80 | 0   |
|  |                       |    |         |                                    |                       | -28 | -8  | 20  |
|  |                       |    |         |                                    |                       | 24  | -8  | 12  |
|  | Huettel et al. 2001   | 10 | Object  | Visual search                      |                       | 28  | -66 | -16 |
|  |                       |    |         |                                    |                       | 22  | -72 | 34  |
|  |                       |    |         |                                    |                       | -22 | -34 | -8  |
|  |                       |    |         |                                    |                       | 32  | 32  | -4  |

|  |                     |    |            |                      |                       |     |     |     |
|--|---------------------|----|------------|----------------------|-----------------------|-----|-----|-----|
|  |                     |    |            |                      |                       | -28 | -8  | 54  |
|  |                     |    |            |                      |                       | 8   | 6   | 54  |
|  |                     |    |            |                      |                       | 16  | 66  | -10 |
|  |                     |    |            |                      |                       | 48  | 2   | 30  |
|  |                     |    |            |                      |                       | -42 | 16  | 26  |
|  | Jack et al. 2007    | 4  | Spatial    | Delayed saccade task |                       | -30 | -55 | 54  |
|  | Kastner et al. 1999 | 5  | Spatial    | Posner cueing        | Expectation > control | -27 | -78 | 46  |
|  |                     |    |            |                      |                       | -17 | -60 | 62  |
|  |                     |    |            |                      |                       | 19  | -57 | 65  |
|  |                     |    |            |                      |                       | -38 | -27 | 65  |
|  |                     |    |            |                      |                       | 43  | -29 | 61  |
|  |                     |    |            |                      |                       | -43 | 7   | 50  |
|  |                     |    |            |                      |                       | 40  | -2  | 57  |
|  |                     |    |            |                      |                       | 1   | 7   | 63  |
|  |                     |    |            |                      |                       | -31 | 40  | 26  |
|  |                     |    |            |                      |                       | 36  | 40  | 35  |
|  | Kincade et al. 2005 | 20 | Spatial    | Posner cueing        | Cue                   | -39 | -47 | 57  |
|  |                     |    |            |                      |                       | -23 | -54 | 62  |
|  |                     |    |            |                      |                       | -12 | -56 | 58  |
|  |                     |    |            |                      |                       | -27 | -58 | 40  |
|  |                     |    |            |                      |                       | -39 | -47 | 52  |
|  |                     |    |            |                      |                       | -19 | -57 | 60  |
|  | Liu et al., 2003    | 14 | Object and | Attention shifting   |                       | 26  | -7  | 49  |
|  |                     |    |            |                      |                       | -24 | -10 | 49  |
|  |                     |    |            |                      |                       | 31  | -50 | 52  |
|  |                     |    |            |                      |                       | -28 | -48 | 47  |
|  |                     |    |            |                      |                       | 54  | -65 | 0   |
|  |                     |    |            |                      |                       | -47 | -68 | 5   |
|  |                     |    |            |                      |                       | 52  | -51 | 7   |
|  |                     |    |            |                      |                       | -44 | -53 | 9   |
|  | Pessoa et al. 2002  | 9  | Spatial    | Working memory       | Delay                 | 3   | 14  | 48  |
|  |                     |    |            |                      |                       | -25 | -3  | 50  |
|  |                     |    |            |                      |                       | 29  | -1  | 49  |
|  |                     |    |            |                      |                       | -39 | 34  | 26  |
|  |                     |    |            |                      |                       | -22 | -59 | 50  |
|  |                     |    |            |                      |                       | 21  | -65 | 52  |
|  |                     |    |            |                      |                       | -39 | -40 | 44  |
|  |                     |    |            |                      |                       | 43  | -34 | 38  |



|  |                            |    |             |                      |                     |     |     |    |
|--|----------------------------|----|-------------|----------------------|---------------------|-----|-----|----|
|  |                            |    |             |                      |                     | -33 | -82 | 14 |
|  | Pessoa et al., 2009        | 20 | Colour      | Attention switching  | Switch > non-switch | -38 | -82 | -6 |
|  |                            |    |             |                      |                     | 36  | -83 | 0  |
|  |                            |    |             |                      |                     | -30 | -59 | -9 |
|  |                            |    |             |                      |                     | -62 | -46 | -7 |
|  |                            |    |             |                      |                     | -26 | -66 | 39 |
|  |                            |    |             |                      |                     | 34  | -57 | 44 |
|  |                            |    |             |                      |                     | -36 | 15  | 29 |
|  |                            |    |             |                      |                     | -21 | 7   | 59 |
|  | Rowe et al. 2000           | 6  | Spatial     | Working memory       | Delay               | 28  | 11  | 54 |
|  |                            |    |             |                      |                     | -22 | 16  | 61 |
|  |                            |    |             |                      |                     | 30  | -56 | 72 |
|  |                            |    |             |                      |                     | 49  | -30 | 45 |
|  |                            |    |             |                      |                     | -22 | -58 | 69 |
|  | Sapir et al. 2005          | 4  | Spatial     | Visual orienting     | Cue                 | -42 | -53 | 56 |
|  | Schluppeck et al. 2005     | 4  | Spatial     | Delayed saccade task |                     | -21 | -75 | 50 |
|  |                            |    |             |                      |                     | -17 | -69 | 61 |
|  | Shomstein and Yantis, 2004 | 11 | Letters and | Shift>hold           |                     | 4   | -58 | 51 |
|  |                            |    |             |                      |                     | -45 | -44 | 54 |
|  |                            |    |             |                      |                     | 22  | 3   | 57 |
|  | Shulman et al. 1999        | 7  | Spatial     | Posner cueing        | Cue                 | -25 | -74 | 28 |
|  |                            |    |             |                      |                     | 33  | -75 | 34 |
|  |                            |    |             |                      |                     | 35  | -70 | 26 |
|  |                            |    |             |                      |                     | -29 | -53 | 64 |
|  |                            |    |             |                      |                     | -32 | -50 | 55 |
|  |                            |    |             |                      |                     | -30 | -47 | 45 |
|  |                            |    |             |                      |                     | 27  | -60 | 37 |
|  |                            |    |             |                      |                     | 29  | -54 | 54 |
|  |                            |    |             |                      |                     | 33  | -46 | 46 |
|  |                            |    |             |                      |                     | -12 | -64 | 65 |
|  |                            |    |             |                      |                     | -23 | -69 | 54 |
|  |                            |    |             |                      |                     | -12 | -76 | 55 |
|  |                            |    |             |                      |                     | 20  | -64 | 62 |
|  |                            |    |             |                      |                     | 25  | -63 | 53 |
|  |                            |    |             |                      |                     | 29  | -70 | 47 |
|  |                            |    |             |                      |                     | -27 | -3  | 54 |
|  |                            |    |             |                      |                     | -43 | -3  | 50 |
|  |                            |    |             |                      |                     | -49 | 5   | 43 |



|  |                     |    |            |                                       |                                  |     |     |     |
|--|---------------------|----|------------|---------------------------------------|----------------------------------|-----|-----|-----|
|  |                     |    |            |                                       |                                  | -4  | -70 | 54  |
|  |                     |    |            |                                       |                                  | -24 | 32  | -18 |
|  | Amunts et al., 2004 | 11 | spoken wd  | Category Fluency                      | Category > Rote Fluency (da      | -4  | 12  | 40  |
|  |                     |    |            |                                       |                                  | 4   | 20  | 24  |
|  |                     |    |            |                                       |                                  | -42 | 26  | 22  |
|  |                     |    |            |                                       |                                  | 30  | 40  | 30  |
|  |                     |    |            |                                       |                                  | -24 | -2  | 54  |
|  | Assaf et al., 2006  | 18 | written wd | object recall from feature pairs (hon | Recall trials > No recall trials | -44 | 14  | 41  |
|  |                     |    |            |                                       |                                  | -45 | 35  | -15 |
|  |                     |    |            |                                       |                                  | 40  | 25  | -18 |
|  |                     |    |            |                                       |                                  | -56 | -46 | 38  |
|  |                     |    |            |                                       |                                  | -66 | -52 | -4  |
|  |                     |    |            |                                       |                                  | -5  | -5  | -1  |
|  |                     |    |            |                                       |                                  | 17  | 12  | 3   |
|  |                     |    |            |                                       |                                  | -12 | 46  | -2  |
|  |                     |    |            |                                       |                                  | -8  | -36 | 38  |
|  |                     |    |            |                                       |                                  | -40 | -47 | 50  |
|  |                     |    |            |                                       |                                  | -66 | -55 | -4  |
|  | Badre et al., 2005  | 22 | written wd | Semantic relatedness                  | Weak > Strong association        | -48 | -48 | 3   |
|  |                     |    |            |                                       |                                  | -51 | 27  | -3  |
|  |                     |    |            |                                       |                                  | -48 | 30  | -12 |
|  |                     |    |            |                                       |                                  | -48 | -48 | 3   |
|  |                     |    |            |                                       |                                  | -51 | 15  | 33  |
|  | Bedny et al., 2008  | 20 | written wd | Semantic relatedness                  | Inconsistent + Consistent >      | -54 | 9   | 39  |
|  |                     |    |            |                                       |                                  | -3  | 33  | 42  |
|  |                     |    |            |                                       |                                  | 36  | -69 | -39 |
|  |                     |    |            |                                       |                                  | -24 | 57  | 24  |
|  |                     |    |            |                                       |                                  | -12 | -6  | 18  |
|  |                     |    |            |                                       |                                  | -45 | -57 | 54  |
|  |                     |    |            |                                       |                                  | -57 | -42 | -3  |
|  |                     |    |            |                                       |                                  | 0   | 27  | 42  |
|  |                     |    |            |                                       |                                  | 39  | -66 | -39 |
|  |                     |    |            |                                       |                                  | -48 | 15  | 9   |
|  |                     |    |            |                                       |                                  | -51 | 6   | 45  |
|  | Bunge et al., 2005  | 20 | written wd | Semantic related Yes/No?              | Low > High probe target ass      | -57 | 24  | 6   |
|  | Chan et al., 2004   | 8  | written wd | Silent generation of associate        | Semantic ambiguity > non-a       | -37 | 59  | 26  |
|  |                     |    |            |                                       |                                  | -10 | 68  | 18  |
|  |                     |    |            |                                       |                                  | -47 | 48  | 21  |

|  |                           |    |                  |                                                                            |                                  |     |     |     |
|--|---------------------------|----|------------------|----------------------------------------------------------------------------|----------------------------------|-----|-----|-----|
|  |                           |    |                  |                                                                            |                                  | -39 | -17 | 67  |
|  |                           |    |                  |                                                                            |                                  | 24  | 2   | 64  |
|  |                           |    |                  |                                                                            |                                  | 49  | 34  | 15  |
|  |                           |    |                  |                                                                            |                                  | 12  | 67  | 19  |
|  |                           |    |                  |                                                                            |                                  | 6   | 39  | -22 |
|  |                           |    |                  |                                                                            |                                  | 37  | -17 | 46  |
|  |                           |    |                  |                                                                            |                                  | 49  | -59 | 45  |
|  |                           |    |                  |                                                                            |                                  | -14 | -92 | 18  |
|  |                           |    |                  |                                                                            |                                  | -52 | -74 | -5  |
|  |                           |    |                  |                                                                            |                                  | 14  | -93 | 45  |
|  |                           |    |                  |                                                                            |                                  | 10  | -75 | 14  |
|  |                           |    |                  |                                                                            |                                  | 7   | -82 | -6  |
|  |                           |    |                  |                                                                            |                                  | 7   | 22  | -17 |
|  |                           |    |                  |                                                                            |                                  | 6   | -30 | 26  |
|  | de Zubicaray et al., 2000 | 8  | written words    | Hayling variant (generate either an appropriate or inappropriate response) | Inappropriate > appropriate      | 1   | 51  | -17 |
|  |                           |    |                  |                                                                            |                                  | 2   | 36  | 39  |
|  |                           |    |                  |                                                                            |                                  | 4   | 47  | -24 |
|  |                           |    |                  |                                                                            |                                  | -12 | 43  | 22  |
|  |                           |    |                  |                                                                            |                                  | -17 | -56 | 48  |
|  |                           |    |                  |                                                                            |                                  | 17  | -74 | 44  |
|  |                           |    |                  |                                                                            |                                  | -2  | -69 | 12  |
|  |                           |    |                  |                                                                            |                                  | -2  | -71 | -12 |
|  |                           |    |                  |                                                                            |                                  | 36  | -74 | -18 |
|  | de Zubicaray et al., 2001 | 8  | pictures & words | Picture naming                                                             | Semantically related > unrelated | -60 | -21 | -17 |
|  |                           |    |                  |                                                                            |                                  | 68  | 4   | -24 |
|  |                           |    |                  |                                                                            |                                  | -48 | -46 | 19  |
|  |                           |    |                  |                                                                            |                                  | 12  | 68  | -9  |
|  |                           |    |                  |                                                                            |                                  | -4  | 46  | -14 |
|  |                           |    |                  |                                                                            |                                  | -32 | 65  | -10 |
|  |                           |    |                  |                                                                            |                                  | 21  | 37  | 56  |
|  |                           |    |                  |                                                                            |                                  | -57 | -31 | 44  |
|  |                           |    |                  |                                                                            |                                  | 10  | -81 | -12 |
|  | de Zubicaray et al., 2006 | 13 | pictures & words | competitor priming paradigm                                                | Related > unrelated blocks       | -60 | -45 | 6   |
|  |                           |    |                  |                                                                            |                                  | -3  | 33  | 24  |
|  |                           |    |                  |                                                                            |                                  | 3   | 36  | 27  |
|  |                           |    |                  |                                                                            |                                  | -45 | 33  | -15 |
|  |                           |    |                  |                                                                            |                                  | 45  | 33  | -12 |
|  |                           |    |                  |                                                                            |                                  | -42 | 18  | 5   |

|  |                                    |    |            |                                      |                               |     |     |     |
|--|------------------------------------|----|------------|--------------------------------------|-------------------------------|-----|-----|-----|
|  |                                    |    |            |                                      |                               | -54 | -15 | -18 |
|  |                                    |    |            |                                      |                               | -48 | 27  | 30  |
|  |                                    |    |            |                                      |                               | -21 | 57  | 18  |
|  |                                    |    |            |                                      |                               | -6  | 24  | 48  |
|  | Dobbins et al., 2004               | 16 | pictures & | Comparison is items smaller/larger t | Shift cue > consistent cue di | -45 | 6   | 27  |
|  |                                    |    |            |                                      |                               | -24 | -57 | -10 |
|  | Gennari et al., 2007               | 17 | written wo | General knowledge question about t   | Ambiguous > unambiguous       | -52 | -61 | 5   |
|  |                                    |    |            |                                      |                               | -44 | 21  | -4  |
|  |                                    |    |            |                                      |                               | -35 | -43 | 48  |
|  |                                    |    |            |                                      |                               | -50 | 4   | 13  |
|  | Gurd et al., 2002                  | 11 | spoken wo  | Category Fluency                     | Category > Rote Fluency (da   | -3  | 25  | 38  |
|  |                                    |    |            |                                      |                               | 10  | 26  | 31  |
|  |                                    |    |            |                                      |                               | -33 | 45  | 23  |
|  |                                    |    |            |                                      |                               | 38  | 53  | 19  |
|  |                                    |    |            |                                      |                               | -38 | 24  | -17 |
|  |                                    |    |            |                                      |                               | 42  | 28  | -19 |
|  |                                    |    |            |                                      |                               | -37 | 8   | 27  |
|  |                                    |    |            |                                      |                               | 9   | -88 | -43 |
|  |                                    |    |            |                                      |                               | -15 | -65 | 69  |
|  |                                    |    |            |                                      |                               | 32  | -60 | 66  |
|  | Hirshorn and Thompson Schill, 2006 | 10 | written wo | Category Fluency                     | Switching > Free generation   | -42 | 3   | 66  |
|  |                                    |    |            |                                      |                               | -18 | 48  | -6  |
|  |                                    |    |            |                                      |                               | -3  | -57 | 63  |
|  |                                    |    |            |                                      |                               | -57 | -57 | 54  |
|  |                                    |    |            |                                      |                               | -3  | -66 | 60  |
|  |                                    |    |            |                                      |                               | -3  | -72 | 0   |
|  |                                    |    |            |                                      |                               | 48  | 24  | 54  |
|  |                                    |    |            |                                      |                               | 48  | 24  | 42  |
|  |                                    |    |            |                                      |                               | 48  | 42  | 30  |
|  |                                    |    |            |                                      |                               | 3   | 51  | -15 |
|  |                                    |    |            |                                      |                               | 39  | 57  | 3   |
|  |                                    |    |            |                                      |                               | 36  | 42  | -9  |
|  |                                    |    |            |                                      |                               | 12  | -27 | -27 |
|  |                                    |    |            |                                      |                               | 42  | -51 | 45  |
|  |                                    |    |            |                                      |                               | -12 | 21  | 63  |
|  |                                    |    |            |                                      |                               | -30 | 54  | 18  |
|  |                                    |    |            |                                      |                               | -51 | 45  | 9   |
|  |                                    |    |            |                                      |                               | -54 | 21  | 39  |

|  |                       |    |               |                      |                              |     |     |     |
|--|-----------------------|----|---------------|----------------------|------------------------------|-----|-----|-----|
|  |                       |    |               |                      |                              | -33 | 18  | 51  |
|  |                       |    |               |                      |                              | -39 | -3  | 51  |
|  |                       |    |               |                      |                              | 15  | 54  | -3  |
|  |                       |    |               |                      |                              | -33 | 27  | 6   |
|  |                       |    |               |                      |                              | -39 | -24 | 33  |
|  |                       |    |               |                      |                              | -33 | -63 | 21  |
|  |                       |    |               |                      |                              | -18 | -21 | 15  |
|  |                       |    |               |                      |                              | -39 | -39 | 36  |
|  |                       |    |               |                      |                              | -39 | -66 | 39  |
|  |                       |    |               |                      |                              | -12 | -66 | 51  |
|  |                       |    |               |                      |                              | 39  | 45  | 39  |
|  |                       |    |               |                      |                              | 36  | 51  | 15  |
|  |                       |    |               |                      |                              | 15  | 33  | 48  |
|  |                       |    |               |                      |                              | 66  | -33 | 21  |
|  |                       |    |               |                      |                              | 51  | -30 | -18 |
|  |                       |    |               |                      |                              | 36  | -54 | 42  |
|  | Hocking et al., 2009  | 18 | pictures      | Picture naming       | Semantically related block > | -66 | -30 | 12  |
|  |                       |    |               |                      |                              | -66 | -12 | 3   |
|  |                       |    |               |                      |                              | -54 | -36 | 15  |
|  |                       |    |               |                      |                              | -30 | -3  | -30 |
|  |                       |    |               |                      |                              | 33  | -6  | -33 |
|  | Ketteler et al., 2008 | 12 | written words | Semantic relatedness | Ambiguous > unambiguous      | -12 | 48  | 38  |
|  |                       |    |               |                      |                              | 21  | 45  | 16  |
|  |                       |    |               |                      |                              | -48 | 39  | -27 |
|  |                       |    |               |                      |                              | -51 | 18  | 6   |
|  |                       |    |               |                      |                              | 43  | 39  | -28 |
|  |                       |    |               |                      |                              | 50  | -51 | 43  |
|  |                       |    |               |                      |                              | -52 | -37 | 58  |
|  |                       |    |               |                      |                              | -31 | -16 | -16 |
|  |                       |    |               |                      |                              | -21 | 41  | 49  |
|  |                       |    |               |                      |                              | -2  | -15 | 10  |
|  |                       |    |               |                      |                              | -47 | 36  | 22  |
|  |                       |    |               |                      |                              | -66 | -43 | -6  |
|  |                       |    |               |                      |                              | 50  | 33  | 18  |
|  |                       |    |               |                      |                              | -2  | -39 | 2   |
|  |                       |    |               |                      |                              | 41  | -60 | 44  |
|  |                       |    |               |                      |                              | -2  | -29 | 6   |
|  |                       |    |               |                      |                              | -58 | 26  | 4   |

|  |                       |    |            |                                         |                             |     |     |     |
|--|-----------------------|----|------------|-----------------------------------------|-----------------------------|-----|-----|-----|
|  |                       |    |            |                                         |                             | -54 | 20  | 32  |
|  |                       |    |            |                                         |                             | -58 | 20  | 0   |
|  |                       |    |            |                                         |                             | -52 | 18  | 28  |
|  | Lee and Dapretto 2006 | 12 | spoken wd  | Semantic relatedness                    | Metaphor > literal meaning  | 55  | 26  | 23  |
|  |                       |    |            |                                         |                             | -48 | -58 | 56  |
|  |                       |    |            |                                         |                             | 66  | -7  | -12 |
|  | Nagel et al., 2008    | 14 | written wd | Verb generation                         | High > low selection        | -51 | 26  | -4  |
|  |                       |    |            |                                         |                             | -46 | -39 | 46  |
|  | Nelson et al., 2009   | 17 | written wd | Verb generation                         | Many > Few associates       | -7  | 18  | 40  |
|  |                       |    |            |                                         |                             | 0   | 11  | 50  |
|  |                       |    |            |                                         |                             | -45 | 0   | 50  |
|  |                       |    |            |                                         |                             | -52 | 22  | 20  |
|  |                       |    |            |                                         |                             | -56 | 11  | 20  |
|  |                       |    |            |                                         |                             | 44  | 40  | 32  |
|  |                       |    |            |                                         |                             | 44  | 14  | 8   |
|  |                       |    |            |                                         |                             | -32 | 62  | -8  |
|  | Noppeney et al., 2002 | 12 | spoken wd  | Semantic categorisation                 | Semantic decisions conjunc  | -43 | 24  | -33 |
|  |                       |    |            |                                         |                             | -25 | 27  | -34 |
|  |                       |    |            |                                         |                             | 4   | 29  | 40  |
|  |                       |    |            |                                         |                             | 16  | -93 | -31 |
|  |                       |    |            |                                         |                             | 35  | -83 | -33 |
|  |                       |    |            |                                         |                             | -32 | 21  | -46 |
|  |                       |    |            |                                         |                             | -39 | 5   | -54 |
|  | Noppeney et al., 2004 | 15 | written wd | Associative judgements                  | Different > Same triads     | -44 | 32  | 10  |
|  |                       |    |            |                                         |                             | -44 | -64 | -18 |
|  |                       |    |            |                                         |                             | -57 | -63 | -1  |
|  |                       |    |            | Synonym judgement                       | Difficult > Easy judgements | -32 | 20  | -13 |
|  |                       |    |            |                                         |                             | -5  | 32  | 46  |
|  |                       |    |            |                                         |                             | -9  | -5  | -1  |
|  |                       |    |            |                                         |                             | -44 | 14  | 25  |
|  |                       |    |            |                                         |                             | 1   | -64 | -49 |
|  | Ochsner et al., 2009  | 16 | written wd | Eriksen flanker : decide is stimulus is | Incongruent > Congruent (i. | -36 | 22  | 28  |
|  |                       |    |            |                                         |                             | 32  | -6  | 44  |
|  |                       |    |            |                                         |                             | 10  | -10 | 58  |
|  |                       |    |            |                                         |                             | 14  | 40  | 30  |
|  |                       |    |            |                                         |                             | -56 | 20  | 24  |
|  |                       |    |            |                                         |                             | 36  | 22  | 16  |
|  |                       |    |            |                                         |                             | -38 | -6  | 42  |

|  |                              |    |            |                                      |                               |     |      |     |
|--|------------------------------|----|------------|--------------------------------------|-------------------------------|-----|------|-----|
|  |                              |    |            |                                      |                               | 34  | 2    | 28  |
|  |                              |    |            |                                      |                               | 58  | -10  | 44  |
|  |                              |    |            |                                      |                               | -16 | 12   | 50  |
|  |                              |    |            |                                      |                               | -16 | 14   | 34  |
|  |                              |    |            |                                      |                               | -8  | 22   | 46  |
|  |                              |    |            |                                      |                               | -6  | -6   | 40  |
|  |                              |    |            |                                      |                               | -40 | -66  | 50  |
|  |                              |    |            |                                      |                               | -38 | -26  | -16 |
|  |                              |    |            |                                      |                               | -32 | -66  | 36  |
|  | Persson et al., 2004         | 22 | written wd | Verb generation                      | High > low selection          | -49 | 26   | 15  |
|  |                              |    |            |                                      |                               | 41  | 15   | 5   |
|  |                              |    |            |                                      |                               | -52 | -52  | -5  |
|  |                              |    |            |                                      |                               | -4  | 8    | 60  |
|  | Race et al., 2009            | 26 | written wd | Attribute judgement (small / organi  | Different attribute > Same a  | -51 | 36   | 12  |
|  |                              |    |            |                                      |                               | -48 | 33   | 0   |
|  |                              |    |            |                                      |                               | -45 | 15   | 24  |
|  |                              |    |            |                                      |                               | -51 | 12   | 15  |
|  | Roskies et al., 2001         | 20 | written wd | Semantic relatedness (yes no decisio | Hard > Easy category verific  | -54 | 23   | -8  |
|  |                              |    |            |                                      |                               | -43 | 46   | 1   |
|  |                              |    |            |                                      |                               | 17  | -92  | -25 |
|  | Snyder et al., 2007          | 14 | written wd | Comparison (global vs. feature)      | Semantic specific > Semanti   | -24 | -102 | -12 |
|  |                              |    |            |                                      |                               | -51 | -57  | -18 |
|  |                              |    |            |                                      |                               | -57 | -48  | -3  |
|  |                              |    |            |                                      |                               | -27 | -69  | 48  |
|  |                              |    |            |                                      |                               | -39 | -45  | 51  |
|  |                              |    |            |                                      |                               | 33  | -48  | 51  |
|  |                              |    |            |                                      |                               | -54 | 27   | 24  |
|  |                              |    |            |                                      |                               | -36 | 42   | 0   |
|  |                              |    |            |                                      |                               | -57 | 15   | 6   |
|  |                              |    |            |                                      |                               | 54  | 27   | 24  |
|  |                              |    |            |                                      |                               | -60 | 9    | 39  |
|  |                              |    |            |                                      |                               | 42  | 18   | 48  |
|  |                              |    |            |                                      |                               | 0   | 45   | 57  |
|  | Spalek et al., 2008          | 21 | pictures & | Picture word interference            | semantically related distract | -35 | -47  | -16 |
|  |                              |    |            |                                      |                               | -51 | 41   | 2   |
|  | Thompson schill et al., 1997 | 6  | written wd | Verb generation                      | High > low selection          | -50 | 13   | 29  |
|  |                              |    |            |                                      |                               | -3  | 18   | 44  |
|  |                              |    |            |                                      |                               | -40 | 20   | 28  |



|  |                              |    |            |                                     |                              |     |     |     |
|--|------------------------------|----|------------|-------------------------------------|------------------------------|-----|-----|-----|
|  |                              |    |            |                                     |                              | -40 | 13  | 33  |
|  |                              |    |            |                                     |                              | 46  | 21  | 31  |
|  |                              |    |            |                                     |                              | -3  | 19  | 53  |
|  |                              |    |            |                                     |                              | -52 | -55 | 2   |
|  |                              |    |            |                                     |                              | -40 | -64 | -14 |
|  |                              |    |            |                                     |                              | -31 | -71 | 41  |
|  |                              |    |            |                                     |                              | -47 | 9   | 29  |
|  |                              |    |            |                                     |                              | 42  | 20  | 18  |
|  |                              |    |            |                                     |                              | -43 | 34  | 2   |
|  |                              |    |            |                                     |                              | -3  | 45  | 29  |
|  |                              |    |            |                                     |                              | -3  | 19  | 53  |
|  |                              |    |            |                                     |                              | -52 | -59 | -7  |
|  |                              |    |            |                                     |                              | -35 | -66 | 53  |
|  | Thompson schill et al., 1999 | 8  | written wd | Attribute generation: same (colour/ | Different attribute > Same a | -46 | 20  | 19  |
|  | Tremblay et al., 2006        | 12 | written wd | Category Fluency                    | Unconstrained > Constraine   | -48 | 32  | 10  |
|  | Wagner et al., 2001          | 14 | written wd | Semantic relatedness                | Weak > Strong association    | -45 | 27  | -12 |
|  |                              |    |            |                                     |                              | 6   | 18  | 39  |
|  |                              |    |            |                                     |                              | 45  | 21  | 6   |
|  |                              |    |            |                                     |                              | 54  | 24  | 27  |
|  |                              |    |            |                                     |                              | -57 | -51 | 0   |
|  |                              |    |            |                                     |                              | -42 | -51 | -15 |
|  |                              |    |            |                                     |                              | -36 | 21  | 27  |
|  |                              |    |            |                                     |                              | 3   | 30  | 36  |
|  |                              |    |            |                                     |                              | -51 | 21  | -12 |
|  |                              |    |            |                                     |                              | -63 | -51 | 6   |
|  | Whitney et al., 2009         | 18 | written wd | Associative judgements              | Ambiguous > unambiguous      | -44 | 20  | 28  |
|  |                              |    |            |                                     |                              | -48 | 24  | 32  |
|  |                              |    |            |                                     |                              | -48 | 28  | 16  |
|  |                              |    |            |                                     |                              | -44 | 12  | 24  |
|  |                              |    |            |                                     |                              | -52 | 32  | -4  |
|  |                              |    |            |                                     |                              | -52 | 20  | 24  |
|  |                              |    |            |                                     |                              | -48 | 8   | 40  |
|  | Wig et al., 2009             | 27 | pictures & | Comparison / categorisation         | Reversed or different decisi | -44 | 11  | 23  |
|  |                              |    |            |                                     |                              | 55  | 9   | 24  |
|  | Zhang et al., 2004           | 14 | written wd | Associative judgements on reversibl | High conflict > Low conflict | -25 | 23  | -21 |
|  |                              |    |            |                                     |                              | 39  | 20  | -22 |
|  |                              |    |            |                                     |                              | 6   | 37  | 17  |
|  |                              |    |            |                                     |                              | -41 | 23  | -14 |

|                              |                            |    |             |                          |                               |     |     |     |
|------------------------------|----------------------------|----|-------------|--------------------------|-------------------------------|-----|-----|-----|
|                              |                            |    |             |                          |                               | -45 | 15  | 18  |
|                              |                            |    |             |                          |                               | 1   | 25  | 33  |
|                              |                            |    |             |                          |                               | 39  | 20  | -18 |
| <b>Tool-praxis decisions</b> | Chao et al., 1999          | 6  | greyscale p | viewing                  | tools > animals               | 29  | -50 | -10 |
|                              |                            |    |             |                          |                               | -27 | -49 | -5  |
|                              |                            |    |             |                          |                               | 44  | -55 | 0   |
|                              |                            |    |             |                          |                               | -48 | -57 | 5   |
|                              |                            |    |             |                          | covert naming                 | 29  | -50 | -18 |
|                              |                            |    |             |                          |                               | -28 | -53 | -16 |
|                              |                            |    |             |                          |                               | 55  | -55 | 7   |
|                              |                            |    |             |                          |                               | -47 | -59 | 10  |
|                              | Chao and Martin, 2000      | 5  | greyscale p | viewing                  | tools > animals               | -31 | 20  | 4   |
|                              |                            |    |             |                          |                               | -53 | 7   | 24  |
|                              |                            |    |             |                          | covert naming                 | -44 | 10  | 21  |
|                              |                            |    |             |                          |                               | -33 | -44 | 47  |
|                              |                            |    |             |                          |                               | -31 | -35 | 52  |
|                              | Chao et al., 2002          | 7  | greyscale p | covert naming            | tool > finger tap             | -26 | -60 | -6  |
|                              |                            |    |             |                          |                               | 25  | -56 | -5  |
|                              |                            |    |             |                          |                               | -46 | -57 | 4   |
|                              |                            |    |             |                          |                               | -32 | -44 | 50  |
|                              | Creem-Regehr and Lee, 2005 | 12 | 3D images   | imagining grasping tools | tools > faces                 | -46 | -52 | -13 |
|                              |                            |    |             |                          |                               | -35 | -47 | -18 |
|                              |                            |    |             |                          |                               | 57  | -62 | 2   |
|                              |                            |    |             |                          |                               | 48  | -67 | 1   |
|                              |                            |    |             |                          |                               | 42  | -44 | -19 |
|                              |                            |    |             |                          |                               | 53  | -59 | 22  |
|                              |                            |    |             |                          |                               | -43 | -19 | 57  |
|                              |                            |    |             |                          |                               | 32  | -37 | 63  |
|                              |                            |    |             |                          |                               | -56 | 5   | 23  |
|                              |                            |    |             |                          |                               | -7  | 29  | 41  |
|                              | Downing et al., 2006       | 12 | colour pho  | viewing                  | action > action-irrelevant se | 8   | -27 | 8   |
|                              |                            |    |             |                          |                               | -18 | -44 | 17  |
|                              |                            |    |             |                          |                               | -32 | -40 | 46  |
|                              |                            |    |             |                          |                               | -41 | -30 | 45  |
|                              | Gerlach et al., 2000       | 15 | line drawin | categorization           | tools > faces                 | -47 | 40  | -30 |
|                              |                            |    |             |                          |                               | -32 | 55  | -30 |
|                              |                            |    |             |                          |                               | -34 | 46  | -31 |
|                              |                            |    |             |                          |                               | -57 | 41  | 10  |

|  |                         |    |             |                      |                            |     |     |     |
|--|-------------------------|----|-------------|----------------------|----------------------------|-----|-----|-----|
|  |                         |    |             |                      |                            | -62 | 29  | -6  |
|  |                         |    |             |                      |                            | -68 | 10  | 18  |
|  |                         |    |             |                      |                            | -11 | 22  | 36  |
|  | Grafton et al., 1997    | 8  | visual imag | viewing              | tools > objects            | -40 | 0   | 53  |
|  |                         |    |             |                      |                            | -33 | 50  | 10  |
|  | Grezes and Decety, 2002 | 10 | colour pho  | orientation judgment | tools > objects            | 14  | 27  | 19  |
|  |                         |    |             |                      |                            | 47  | 51  | 16  |
|  |                         |    |             |                      |                            | 51  | -67 | 19  |
|  |                         |    |             |                      |                            | 64  | 27  | -13 |
|  |                         |    |             |                      |                            | 53  | -29 | -9  |
|  |                         |    |             |                      |                            | 31  | -1  | -14 |
|  |                         |    |             |                      |                            | 55  | -5  | -27 |
|  | Handy et al., 2003      | 14 | line drawin | viewing              | tool > rest                | -12 | 27  | 31  |
|  |                         |    |             |                      |                            | 56  | 25  | 26  |
|  |                         |    |             |                      |                            | -46 | 15  | 46  |
|  |                         |    |             |                      |                            | -3  | 25  | 33  |
|  |                         |    |             |                      |                            | 59  | -49 | 35  |
|  |                         |    |             |                      |                            | -56 | -49 | 37  |
|  | James et al. 2002       | 6  | 3D images   | viewing              | tools > non-meaningful mov | 38  | -46 | -22 |
|  |                         |    |             |                      |                            | -36 | -50 | -24 |
|  |                         |    |             |                      |                            | 29  | -74 | 41  |
|  |                         |    |             |                      |                            | -12 | -71 | 45  |
|  | Moscovitch et al., 1995 | 13 | line drawin | 1-back task          | tool > sham arm movement   | 30  | -71 | 24  |
|  |                         |    |             |                      |                            | 28  | -59 | 37  |
|  |                         |    |             |                      |                            | 30  | -54 | 45  |
|  |                         |    |             |                      |                            | 44  | -55 | -18 |
|  |                         |    |             |                      |                            | 46  | -57 | -13 |
|  |                         |    |             |                      |                            | 44  | -63 | -4  |
|  |                         |    |             |                      |                            | 44  | 30  | 19  |
|  |                         |    |             |                      |                            | 8   | -42 | -14 |
|  |                         |    |             |                      |                            | -3  | -42 | -5  |
|  |                         |    |             |                      |                            | 42  | 0   | -19 |
|  |                         |    |             |                      |                            | -53 | -48 | 19  |
|  |                         |    |             |                      |                            | 1   | 52  | -19 |
|  |                         |    |             |                      |                            | 3   | 61  | -6  |
|  |                         |    |             |                      |                            | 8   | 51  | 17  |
|  | Price et al., 1996      | 6  | coloured d  | viewing              | tools > scenes             | -51 | -25 | -33 |
|  | Robert et al. 2010      | 14 | visual imag | categorization       | tools > objects            | -52 | -70 | -1  |

|  |                          |    |             |                      |                   |     |     |     |
|--|--------------------------|----|-------------|----------------------|-------------------|-----|-----|-----|
|  |                          |    |             |                      |                   | 53  | -67 | -7  |
|  |                          |    |             |                      |                   | 42  | -90 | -1  |
|  |                          |    |             |                      |                   | 60  | -40 | 9   |
|  |                          |    |             |                      |                   | -47 | 13  | 7   |
|  |                          |    |             |                      |                   | 10  | -2  | -12 |
|  | Spiridon et al. 2006     | 14 | greyscale p | 1-back task          | tools > faces     | 32  | -51 | -13 |
|  | Vingerhoets, 2008        | 15 | colour pho  | orientation judgment | tools > objects   | -54 | -57 | 37  |
|  |                          |    |             |                      |                   | -5  | -48 | 25  |
|  |                          |    |             |                      |                   | -7  | -69 | 41  |
|  |                          |    |             |                      |                   | -57 | -38 | 1   |
|  | Wadsworth and Kana, 2011 | 32 | colour pho  | imagining tool use   | tools > rest      | 21  | -95 | 6   |
|  |                          |    |             |                      |                   | -50 | 12  | 30  |
|  |                          |    |             |                      |                   | 27  | -27 | -3  |
|  |                          |    |             |                      |                   | -20 | -30 | -3  |
|  |                          |    |             |                      |                   | 61  | 42  | 11  |
|  |                          |    |             |                      |                   | 70  | 20  | 6   |
|  |                          |    |             |                      |                   | -20 | 6   | 1   |
|  |                          |    |             |                      |                   | 48  | 12  | 22  |
|  |                          |    |             |                      |                   | -16 | -5  | -4  |
|  |                          |    |             |                      |                   | -35 | 17  | -8  |
|  | Kassuba et al., 2011     | 19 | greyscale p | 1-back task          | tools > scrambled | -50 | -27 | 16  |
|  |                          |    |             |                      |                   | -44 | -8  | 0   |
|  |                          |    |             |                      |                   | -40 | -27 | 19  |
|  |                          |    |             |                      |                   | -34 | 29  | -5  |
|  |                          |    |             |                      |                   | -63 | 4   | -7  |
|  |                          |    |             |                      |                   | 65  | -15 | 12  |
|  |                          |    |             |                      |                   | 62  | -27 | 14  |
|  |                          |    |             |                      |                   | 56  | 7   | -9  |
|  |                          |    |             |                      |                   | 46  | -5  | -7  |
|  |                          |    |             |                      |                   | 43  | -3  | 8   |
|  |                          |    |             |                      |                   | -44 | -49 | -5  |
|  |                          |    |             |                      |                   | -41 | -47 | -14 |
|  |                          |    |             |                      |                   | -47 | -71 | -2  |
|  |                          |    |             |                      |                   | -28 | -48 | -17 |
|  |                          |    |             |                      |                   | -34 | -30 | -22 |
|  |                          |    |             |                      |                   | -25 | -53 | -13 |
|  |                          |    |             |                      |                   | -44 | 39  | -3  |
|  |                          |    |             |                      |                   | 59  | 38  | -14 |



|  |                         |    |                 |               |                                   |     |     |     |
|--|-------------------------|----|-----------------|---------------|-----------------------------------|-----|-----|-----|
|  |                         |    |                 |               |                                   | -20 | 73  | -11 |
|  |                         |    |                 |               |                                   | 43  | -27 | -3  |
|  |                         |    |                 |               |                                   | -56 | -36 | 4   |
|  |                         |    |                 |               |                                   | -24 | -7  | 6   |
|  |                         |    |                 |               |                                   | -41 | 37  | 19  |
|  |                         |    |                 |               |                                   | 33  | 6   | 30  |
|  |                         |    |                 |               |                                   | -51 | 1   | 32  |
|  |                         |    |                 |               |                                   | -12 | -19 | 42  |
|  | Liljestrom et al., 2008 | 15 | line drawing    | covert naming | tools > non-meaningful objects    | -50 | -73 | 6   |
|  |                         |    |                 |               |                                   | -33 | -53 | -19 |
|  |                         |    |                 |               |                                   | -35 | -43 | -24 |
|  |                         |    |                 |               |                                   | -30 | -56 | 52  |
|  |                         |    |                 |               |                                   | -50 | -30 | 44  |
|  |                         |    |                 |               |                                   | -44 | 15  | 6   |
|  |                         |    |                 |               |                                   | -36 | 34  | -13 |
|  |                         |    |                 |               |                                   | 42  | -50 | -17 |
|  |                         |    |                 |               |                                   | 44  | -84 | 12  |
|  |                         |    |                 |               |                                   | 23  | -64 | 52  |
|  |                         |    |                 |               |                                   | 32  | -51 | 52  |
|  |                         |    |                 |               |                                   | 38  | -87 | 16  |
|  | Martin et al., 1996     | 16 | line drawing    | covert naming | tool > objects                    | -29 | -53 | -12 |
|  |                         |    |                 |               |                                   | 38  | -53 | -13 |
|  |                         |    |                 |               |                                   | -38 | -50 | -3  |
|  |                         |    |                 |               |                                   | -25 | 6   | 4   |
|  |                         |    |                 |               |                                   | -12 | -17 | 6   |
|  |                         |    |                 |               |                                   | -31 | 11  | 4   |
|  |                         |    |                 |               |                                   | -38 | 3   | 9   |
|  |                         |    |                 |               |                                   | 31  | 32  | -4  |
|  |                         |    |                 |               |                                   | 10  | -61 | -30 |
|  | Okada et al., 2000      | 12 | greyscale image | covert naming | tool > objects                    | -48 | 30  | 16  |
|  |                         |    |                 |               |                                   | -48 | -36 | 56  |
|  |                         |    |                 |               |                                   | -40 | -34 | 44  |
|  |                         |    |                 |               |                                   | -50 | -52 | -8  |
|  |                         |    |                 |               |                                   | -46 | -68 | -4  |
|  | Tranel et al., 2005     | 10 | colour photo    | covert naming | tools > animals                   | -27 | -31 | -18 |
|  |                         |    |                 |               |                                   | -53 | -49 | -15 |
|  | Valyear et al., 2007    | 11 | greyscale photo | covert naming | familiar tools > unfamiliar tools | -46 | -33 | 49  |
|  |                         |    |                 |               |                                   | -51 | -62 | 7   |

|  |                           |    |             |                            |                         |     |     |     |
|--|---------------------------|----|-------------|----------------------------|-------------------------|-----|-----|-----|
|  |                           |    |             |                            |                         | -49 | 17  | 10  |
|  | Wierenga et al., 2009     | 20 | greyscale p | covert naming              | tools > animate objects | -54 | -57 | 0   |
|  |                           |    |             |                            |                         | 48  | -73 | 4   |
|  |                           |    |             |                            |                         | -60 | -30 | 39  |
|  |                           |    |             |                            |                         | 37  | -36 | 44  |
|  |                           |    |             |                            |                         | -27 | -72 | 37  |
|  |                           |    |             |                            |                         | -50 | -69 | 28  |
|  | Johnson-Frey et al., 2005 | 24 | names (a    | planning tool-use gestures | tools > scrambled       | -43 | -48 | 57  |
|  |                           |    |             |                            |                         | -33 | -66 | 63  |
|  |                           |    |             |                            |                         | -44 | 39  | -7  |
|  |                           |    |             |                            |                         | -41 | 36  | -20 |
|  |                           |    |             |                            |                         | -32 | 37  | -21 |
|  |                           |    |             |                            |                         | -53 | 11  | 22  |
|  |                           |    |             |                            |                         | -9  | 52  | 33  |
|  |                           |    |             |                            |                         | -44 | 40  | -7  |
|  |                           |    |             |                            |                         | -54 | 22  | -2  |
|  |                           |    |             |                            |                         | -52 | -56 | -5  |
|  |                           |    |             |                            |                         | -63 | -37 | 1   |
|  |                           |    |             |                            |                         | -33 | -29 | 0   |
|  |                           |    |             |                            |                         | -42 | -2  | -4  |
|  |                           |    |             |                            |                         | 71  | -25 | -2  |
|  |                           |    |             |                            |                         | 30  | 5   | 6   |
|  | Creem-Regehr et al., 2005 | 12 | 3D images   | viewing                    | tools > shapes          | -44 | -75 | 2   |
|  |                           |    |             |                            |                         | -42 | -36 | -15 |
|  |                           |    |             |                            |                         | 48  | -62 | 6   |
|  |                           |    |             |                            |                         | 48  | -40 | -16 |
|  |                           |    |             |                            |                         | 50  | -67 | -1  |
|  |                           |    |             |                            |                         | 44  | -48 | 14  |
|  |                           |    |             |                            |                         | -41 | -44 | 63  |
|  |                           |    |             |                            |                         | -19 | -53 | 68  |
|  |                           |    |             |                            |                         | -26 | 0   | 58  |
|  |                           |    |             |                            |                         | 28  | 2   | 57  |
|  |                           |    |             |                            |                         | -9  | 13  | 60  |
|  |                           |    |             |                            |                         | 47  | -30 | 66  |
|  |                           |    |             |                            |                         | -55 | 7   | 4   |
|  |                           |    |             |                            |                         | 15  | 16  | 51  |
|  |                           |    |             |                            |                         | -16 | 12  | -2  |
|  | Kellenbach et al., 2003   | 9  | coloured p  | manipulation judgment      | tools > control         | -48 | -64 | -5  |

|  |                           |    |              |                       |                              |     |     |     |
|--|---------------------------|----|--------------|-----------------------|------------------------------|-----|-----|-----|
|  |                           |    |              |                       |                              | -44 | -29 | -24 |
|  |                           |    |              |                       |                              | -48 | 8   | 16  |
|  |                           |    |              |                       |                              | -38 | 34  | -24 |
|  |                           |    |              |                       |                              | -44 | 40  | -12 |
|  |                           |    |              |                       |                              | -58 | -14 | 23  |
|  |                           |    |              |                       |                              | -39 | -37 | 47  |
|  |                           |    |              |                       |                              | -58 | -41 | 23  |
|  |                           |    |              |                       |                              | 28  | 80  | -57 |
|  | Choi et al., 2001         | 10 | names        | planning pantomimes   | tools > scrambled            | -37 | -44 | 63  |
|  |                           |    |              |                       |                              | -15 | -5  | 68  |
|  |                           |    |              |                       |                              | -2  | 12  | 66  |
|  |                           |    |              |                       |                              | -3  | -95 | -22 |
|  |                           |    |              |                       |                              | 6   | -63 | -3  |
|  |                           |    |              |                       |                              | 1   | -72 | -11 |
|  |                           |    |              |                       |                              | -59 | -60 | -16 |
|  |                           |    |              |                       |                              | -16 | 10  | -5  |
|  | Boronat et al., 2004      | 15 | line drawing | manipulation judgment | tools > scrambled            | -55 | 11  | 10  |
|  |                           |    |              |                       |                              | -3  | 26  | 33  |
|  |                           |    |              |                       |                              | -34 | 1   | 48  |
|  |                           |    |              |                       |                              | -34 | -70 | 48  |
|  |                           |    |              |                       |                              | -55 | -7  | -12 |
|  |                           |    |              |                       |                              | 50  | -83 | 7   |
|  |                           |    |              |                       |                              | -19 | -2  | 1   |
|  | Hermisdorfer et al., 2007 | 23 | video clips  | planning tool use     | planning tool use > watching | -47 | -59 | 15  |
|  |                           |    |              |                       |                              | 59  | -55 | 12  |
|  |                           |    |              |                       |                              | -37 | -32 | 51  |
|  |                           |    |              |                       |                              | -50 | -23 | 47  |
|  |                           |    |              |                       |                              | 47  | -22 | 51  |
|  |                           |    |              |                       |                              | 63  | -37 | 28  |
|  |                           |    |              |                       |                              | -33 | -39 | 63  |
|  |                           |    |              |                       |                              | -20 | -52 | 63  |
|  |                           |    |              |                       |                              | -21 | 2   | 64  |
|  |                           |    |              |                       |                              | 31  | 12  | 68  |
|  |                           |    |              |                       |                              | -31 | 29  | -11 |
|  |                           |    |              |                       |                              | -50 | 11  | 24  |
|  |                           |    |              |                       |                              | -34 | 42  | 18  |
|  |                           |    |              |                       |                              | -34 | 50  | 26  |
|  |                           |    |              |                       |                              | -8  | 20  | 36  |



|  |                         |    |            |                              |                              |     |     |     |
|--|-------------------------|----|------------|------------------------------|------------------------------|-----|-----|-----|
|  |                         |    |            |                              |                              | -25 | 7   | -11 |
|  |                         |    |            |                              |                              | 30  | 5   | -6  |
|  | Ohgami et al., 2004     | 18 | names      | planning pantomimes          | planning tool use > animal r | 2   | 18  | 53  |
|  |                         |    |            |                              |                              | -26 | 9   | 67  |
|  |                         |    |            |                              |                              | -46 | -38 | 60  |
|  |                         |    |            |                              |                              | -30 | -51 | 73  |
|  |                         |    |            |                              |                              | -51 | 13  | 23  |
|  |                         |    |            |                              |                              | -46 | 40  | 17  |
|  | Fridman et al., 2006    | 19 | written co | planning transitive gestures | planning tool use > pattern  | -42 | 25  | 15  |
|  |                         |    |            |                              |                              | -56 | 11  | 32  |
|  |                         |    |            |                              |                              | -44 | 11  | 24  |
|  |                         |    |            |                              |                              | 10  | 13  | 45  |
|  |                         |    |            |                              |                              | -3  | 17  | 34  |
|  |                         |    |            |                              |                              | -5  | 4   | 41  |
|  |                         |    |            |                              |                              | -65 | -30 | 28  |
|  |                         |    |            |                              |                              | -61 | -26 | 23  |
|  |                         |    |            |                              |                              | 8   | -32 | 23  |
|  |                         |    |            |                              |                              | -5  | -34 | 28  |
|  |                         |    |            |                              |                              | 8   | -41 | 18  |
|  | Bohlhalter et al., 2009 | 15 | written co | planning transitive gestures | planning tool use > rest     | 37  | 26  | -11 |
|  |                         |    |            |                              |                              | -40 | 29  | -2  |
|  |                         |    |            |                              |                              | 6   | 20  | 38  |
|  |                         |    |            |                              |                              | -38 | -14 | -53 |
|  |                         |    |            |                              |                              | 36  | -73 | 43  |
|  |                         |    |            |                              |                              | -32 | -65 | 45  |
|  |                         |    |            |                              |                              | 65  | -51 | -7  |
|  |                         |    |            |                              |                              | -59 | -57 | -16 |
|  |                         |    |            |                              |                              | 44  | -56 | -31 |
|  |                         |    |            |                              |                              | -50 | -56 | -22 |
|  | Wadsworth et al., 2011  | 32 | colour pho | viewing                      | tools > animals              | -12 | -88 | -2  |
|  |                         |    |            |                              |                              | -50 | 15  | 19  |
|  |                         |    |            |                              |                              | -26 | -53 | 70  |
|  |                         |    |            |                              |                              | -22 | -29 | 0   |
|  |                         |    |            |                              |                              | -9  | 19  | 61  |
|  |                         |    |            |                              |                              | -28 | 12  | 54  |
|  |                         |    |            |                              |                              | 27  | -29 | -1  |
|  |                         |    |            |                              |                              | 36  | -65 | 42  |
|  |                         |    |            |                              |                              | -18 | -5  | -3  |

|                             |                         |    |              |                                |                              |     |     |     |
|-----------------------------|-------------------------|----|--------------|--------------------------------|------------------------------|-----|-----|-----|
|                             | Phillips et al., 2002   | 26 | pictures/p   | manipulation judgment          | manipulation judgement > c   | -51 | 22  | 12  |
|                             |                         |    |              |                                |                              | -47 | 38  | -3  |
|                             |                         |    |              |                                |                              | -59 | -65 | 1   |
|                             |                         |    |              |                                |                              | -55 | -40 | -11 |
|                             |                         |    |              |                                |                              | -45 | -11 | -43 |
|                             |                         |    |              |                                |                              | -49 | -39 | -25 |
|                             | Canessa et al., 2008    | 15 | colour pho   | manipulation matching          | manipulation judgement > s   | -32 | -48 | 59  |
|                             |                         |    |              |                                |                              | -52 | -23 | 43  |
|                             |                         |    |              |                                |                              | -26 | 14  | 54  |
|                             | Vingerhoet et al., 2009 | 15 | 3D images    | imagining grasping/using tools | use tools > move tools       | -25 | -49 | 72  |
|                             |                         |    |              |                                |                              | -33 | -39 | 57  |
|                             |                         |    |              |                                |                              | -44 | -26 | 51  |
|                             | Peran et al., 2010      | 12 | line drawing | imagining tool use             | imagine tool use > size judg | -22 | 8   | 57  |
|                             | Grafton et al., 1996    | 7  | real tools   | imagining grasping tools       | imagine grasping > scramble  | -5  | 0   | 60  |
|                             |                         |    |              |                                |                              | -19 | -9  | 62  |
|                             |                         |    |              |                                |                              | 21  | -16 | 57  |
|                             |                         |    |              |                                |                              | 1   | 5   | 50  |
|                             |                         |    |              |                                |                              | -50 | -52 | 43  |
|                             |                         |    |              |                                |                              | -25 | -60 | 39  |
|                             |                         |    |              |                                |                              | -21 | -75 | 38  |
|                             |                         |    |              |                                |                              | -45 | 4   | 29  |
|                             |                         |    |              |                                |                              | -44 | 31  | 24  |
|                             |                         |    |              |                                |                              | 15  | 17  | 7   |
|                             |                         |    |              |                                |                              | -51 | -11 | 5   |
|                             |                         |    |              |                                |                              | 37  | -63 | -34 |
|                             | Buxbaum et al., 2006    | 15 | pictures     | action decision                | Prehensile use > scrambled   | -60 | -27 | 43  |
|                             |                         |    |              |                                |                              | -50 | 5   | 33  |
|                             |                         |    |              |                                |                              | -5  | -25 | -12 |
|                             |                         |    |              |                                |                              | 31  | -60 | 65  |
|                             |                         |    |              |                                |                              | 41  | -5  | 59  |
| <b>Default mode network</b> | Buckner, 1998           | 26 |              |                                | Recognition - Fixation, Decr | 7   | 59  | 3   |
|                             |                         |    |              |                                |                              | 8   | -48 | 31  |
|                             |                         |    |              |                                |                              | 4   | 39  | 8   |
|                             |                         |    |              |                                |                              | 14  | 52  | -3  |
|                             |                         |    |              |                                |                              | -1  | -49 | 52  |
|                             |                         |    |              |                                |                              | 2   | -47 | 38  |
|                             |                         |    |              |                                |                              | 62  | -55 | 20  |
|                             |                         |    |              |                                |                              | 5   | -16 | 48  |

|  |              |    |  |  |                               |     |      |     |
|--|--------------|----|--|--|-------------------------------|-----|------|-----|
|  |              |    |  |  |                               | 65  | -6   | 15  |
|  |              |    |  |  |                               | 2   | -26  | 49  |
|  |              |    |  |  |                               | 4   | 50   | 4   |
|  |              |    |  |  |                               | 48  | -71  | 30  |
|  |              |    |  |  |                               | -42 | -76  | 24  |
|  |              |    |  |  |                               | 62  | -37  | 43  |
|  |              |    |  |  |                               | -6  | 52   | -3  |
|  |              |    |  |  |                               | -59 | -26  | 16  |
|  |              |    |  |  |                               | -6  | 52   | -3  |
|  |              |    |  |  |                               | -21 | 27   | 49  |
|  |              |    |  |  |                               | 44  | -14  | -1  |
|  |              |    |  |  |                               | -56 | -10  | 11  |
|  |              |    |  |  |                               | -39 | -14  | 1   |
|  |              |    |  |  |                               | -1  | -45  | 66  |
|  |              |    |  |  |                               | -8  | 68   | 27  |
|  |              |    |  |  |                               | 25  | -73  | 50  |
|  |              |    |  |  |                               | -36 | 1    | -7  |
|  |              |    |  |  |                               | -2  | 57   | 25  |
|  |              |    |  |  |                               | 68  | -20  | 1   |
|  |              |    |  |  |                               | -17 | -38  | 69  |
|  |              |    |  |  |                               | -45 | -22  | 19  |
|  |              |    |  |  |                               | -56 | 0    | 13  |
|  |              |    |  |  |                               | 65  | -11  | 33  |
|  | Sadato, 1998 | 8  |  |  | Rest-Discrimination (Sighted) | -18 | 24   | 56  |
|  |              |    |  |  |                               | -12 | 57   | -6  |
|  |              |    |  |  |                               | -23 | 62   | 3   |
|  |              |    |  |  |                               | 34  | -89  | -10 |
|  |              |    |  |  |                               | 49  | -73  | 2   |
|  |              |    |  |  |                               | -25 | -99  | 6   |
|  |              |    |  |  |                               | -7  | -104 | -8  |
|  |              |    |  |  |                               | 21  | -74  | -7  |
|  |              |    |  |  |                               | -4  | -40  | 62  |
|  |              |    |  |  |                               | 19  | -42  | 58  |
|  |              |    |  |  |                               | 1   | 18   | -15 |
|  |              |    |  |  |                               | -49 | 36   | -3  |
|  | Rosen, 1999  | 13 |  |  | Rest > Endogenous             | 6   | -70  | 37  |
|  |              |    |  |  |                               | 11  | -29  | 75  |
|  |              |    |  |  |                               | -1  | -91  | 7   |

|  |              |    |  |  |                              |     |      |     |
|--|--------------|----|--|--|------------------------------|-----|------|-----|
|  |              |    |  |  |                              | 5   | -88  | 11  |
|  |              |    |  |  |                              | -5  | -56  | 22  |
|  |              |    |  |  |                              | -58 | -8   | 8   |
|  |              |    |  |  | Rest > Exogenous             | 0   | -74  | 34  |
|  |              |    |  |  |                              | 6   | -73  | 33  |
|  |              |    |  |  |                              | -1  | -88  | 13  |
|  |              |    |  |  |                              | 6   | -78  | 50  |
|  |              |    |  |  | Rest > Control               | -1  | -77  | 41  |
|  |              |    |  |  |                              | 6   | -77  | 40  |
|  |              |    |  |  |                              | 12  | -39  | 74  |
|  |              |    |  |  |                              | 5   | -89  | 9   |
|  | Fox, 1996    | 10 |  |  | Rest > Solo, Controls        | -27 | 20   | -11 |
|  |              |    |  |  |                              | 16  | 40   | -4  |
|  |              |    |  |  |                              | 14  | 51   | -3  |
|  |              |    |  |  |                              | -21 | 53   | -1  |
|  |              |    |  |  |                              | 53  | 48   | -17 |
|  |              |    |  |  |                              | -27 | 16   | 41  |
|  |              |    |  |  |                              | -24 | -17  | -17 |
|  |              |    |  |  |                              | -38 | -3   | -5  |
|  |              |    |  |  |                              | 12  | 29   | 15  |
|  |              |    |  |  |                              | 10  | 41   | 9   |
|  |              |    |  |  |                              | -16 | 21   | 43  |
|  |              |    |  |  |                              | 31  | 3    | -12 |
|  |              |    |  |  |                              | 40  | 49   | -1  |
|  |              |    |  |  |                              | 53  | 47   | -8  |
|  |              |    |  |  |                              | -16 | 35   | 30  |
|  |              |    |  |  | Rest > Chorus, Controls      | 16  | 38   | -4  |
|  |              |    |  |  |                              | -21 | 55   | -3  |
|  |              |    |  |  |                              | -16 | 35   | 30  |
|  |              |    |  |  |                              | 7   | 28   | -19 |
|  |              |    |  |  |                              | -38 | -5   | -6  |
|  |              |    |  |  |                              | -6  | 12   | -8  |
|  |              |    |  |  |                              | 12  | 45   | 4   |
|  |              |    |  |  |                              | 8   | -36  | 32  |
|  |              |    |  |  |                              | 16  | -40  | 6   |
|  |              |    |  |  |                              | -16 | 22   | 37  |
|  |              |    |  |  |                              | -25 | 26   | -11 |
|  | Sadato, 1996 | 8  |  |  | Rest > Discrimination, Sight | -5  | -104 | -12 |

|  |             |    |  |  |                     |     |     |     |
|--|-------------|----|--|--|---------------------|-----|-----|-----|
|  | Petit, 1999 | 10 |  |  | Rest > DIS          | -44 | -30 | 12  |
|  |             |    |  |  |                     | 44  | -30 | 12  |
|  |             |    |  |  |                     | -52 | -4  | 4   |
|  |             |    |  |  |                     | 50  | 2   | 4   |
|  |             |    |  |  |                     | -44 | 12  | -16 |
|  |             |    |  |  |                     | 42  | 14  | -16 |
|  |             |    |  |  |                     | -54 | -62 | 20  |
|  |             |    |  |  |                     | 54  | -64 | 16  |
|  |             |    |  |  |                     | -36 | 10  | 48  |
|  |             |    |  |  |                     | -34 | 20  | 32  |
|  |             |    |  |  |                     | -4  | 46  | 20  |
|  |             |    |  |  |                     | 12  | 36  | 40  |
|  |             |    |  |  |                     | -4  | -4  | 36  |
|  |             |    |  |  |                     | -2  | -72 | 28  |
|  |             |    |  |  |                     | -12 | -46 | 8   |
|  |             |    |  |  |                     | 6   | -58 | 16  |
|  |             |    |  |  | Rest > FIX          | -40 | -32 | 8   |
|  |             |    |  |  |                     | 44  | -30 | 12  |
|  |             |    |  |  |                     | -56 | -4  | 4   |
|  |             |    |  |  |                     | 50  | 2   | 4   |
|  |             |    |  |  |                     | -42 | 4   | -16 |
|  |             |    |  |  |                     | 44  | -2  | -16 |
|  |             |    |  |  |                     | -54 | -64 | 20  |
|  |             |    |  |  |                     | 50  | -72 | 20  |
|  |             |    |  |  |                     | -54 | 24  | 20  |
|  |             |    |  |  |                     | 22  | 58  | -4  |
|  |             |    |  |  |                     | -10 | -58 | 32  |
|  |             |    |  |  |                     | 2   | -62 | 32  |
|  | Rajah, 1998 | 12 |  |  | LV 2, Deactivations | 14  | -84 | -28 |
|  |             |    |  |  |                     | 44  | -61 | -31 |
|  |             |    |  |  |                     | 59  | -31 | -29 |
|  |             |    |  |  |                     | 10  | 19  | 2   |
|  |             |    |  |  |                     | 44  | -6  | -14 |
|  |             |    |  |  |                     | 64  | -55 | 4   |
|  |             |    |  |  |                     | 62  | -32 | 42  |
|  |             |    |  |  |                     | 6   | -25 | 38  |
|  |             |    |  |  |                     | -66 | -58 | 11  |
|  |             |    |  |  |                     | -59 | -41 | 27  |

|  |                       |    |  |  |                               |     |     |     |
|--|-----------------------|----|--|--|-------------------------------|-----|-----|-----|
|  |                       |    |  |  |                               | -61 | -55 | 38  |
|  |                       |    |  |  |                               | -59 | -58 | -16 |
|  |                       |    |  |  |                               | -27 | -51 | -17 |
|  |                       |    |  |  |                               | -29 | 9   | -18 |
|  |                       |    |  |  |                               | 6   | -88 | 0   |
|  | Tzourio-Mazoyer, 1998 | 5  |  |  | Rest > Text in Right-Handers  | 42  | 46  | 10  |
|  |                       |    |  |  |                               | 42  | 50  | -2  |
|  |                       |    |  |  |                               | 50  | 34  | 26  |
|  |                       |    |  |  |                               | 16  | -54 | 20  |
|  |                       |    |  |  |                               | 36  | -72 | 20  |
|  |                       |    |  |  |                               | 30  | -74 | 34  |
|  |                       |    |  |  |                               | 54  | -48 | -8  |
|  |                       |    |  |  |                               | 50  | -38 | -20 |
|  |                       |    |  |  |                               | 44  | -32 | -20 |
|  |                       |    |  |  |                               | 62  | -26 | 28  |
|  |                       |    |  |  |                               | -8  | -70 | 36  |
|  |                       |    |  |  |                               | 8   | -68 | 40  |
|  |                       |    |  |  |                               | 14  | 68  | -2  |
|  |                       |    |  |  |                               | -58 | -22 | 32  |
|  |                       |    |  |  | Rest > Text in Left-Handers   | -58 | -28 | 34  |
|  |                       |    |  |  |                               | -50 | -44 | 46  |
|  |                       |    |  |  |                               | -36 | -36 | 48  |
|  |                       |    |  |  |                               | -50 | -60 | -10 |
|  |                       |    |  |  |                               | -10 | -58 | 66  |
|  |                       |    |  |  |                               | 4   | -36 | 48  |
|  |                       |    |  |  |                               | -8  | -34 | 52  |
|  |                       |    |  |  |                               | -44 | 30  | 32  |
|  |                       |    |  |  |                               | -36 | 32  | 20  |
|  |                       |    |  |  |                               | -38 | 46  | 8   |
|  |                       |    |  |  |                               | 62  | -32 | 34  |
|  |                       |    |  |  |                               | 50  | -52 | 48  |
|  |                       |    |  |  |                               | 54  | -38 | 42  |
|  |                       |    |  |  |                               | -22 | 2   | 66  |
|  |                       |    |  |  |                               | 38  | 28  | 36  |
|  |                       |    |  |  |                               | 26  | 8   | 60  |
|  |                       |    |  |  |                               | 56  | -36 | -22 |
|  |                       |    |  |  |                               | 48  | 42  | 8   |
|  | Muley, 2001           | 10 |  |  | Baseline - Activation Effects | 3   | 35  | -15 |

|  |               |    |  |                               |     |     |     |
|--|---------------|----|--|-------------------------------|-----|-----|-----|
|  |               |    |  | Baseline - Activation Effects | 0   | -41 | 45  |
|  |               |    |  |                               | 1   | -51 | 44  |
|  | Shen, 1999    | 9  |  | Common Deactivation           | -23 | -54 | -4  |
|  |               |    |  |                               | -51 | -7  | 0   |
|  |               |    |  |                               | -9  | -43 | 36  |
|  |               |    |  |                               | 1   | -11 | 46  |
|  |               |    |  |                               | -9  | 48  | -19 |
|  |               |    |  |                               | 53  | -7  | -1  |
|  |               |    |  |                               | 3   | -11 | 46  |
|  |               |    |  |                               | 10  | 48  | -20 |
|  | Brannan, 2001 | 9  |  | Rest - CO2 FM                 | -1  | 26  | 31  |
|  |               |    |  |                               | 2   | -23 | 31  |
|  |               |    |  |                               | 2   | -49 | 25  |
|  |               |    |  |                               | 33  | 52  | -19 |
|  |               |    |  |                               | -34 | 50  | -18 |
|  |               |    |  |                               | -25 | 55  | -1  |
|  |               |    |  |                               | 0   | 10  | -26 |
|  |               |    |  |                               | -24 | 28  | 47  |
|  |               |    |  |                               | -31 | 14  | 42  |
|  |               |    |  |                               | 34  | 27  | 41  |
|  |               |    |  |                               | -58 | -19 | -33 |
|  | Fiez, 1999    | 11 |  | Fixation - Word Reading       | 28  | 59  | 5   |
|  |               |    |  |                               | 15  | 55  | -18 |
|  |               |    |  |                               | 28  | 53  | 1   |
|  |               |    |  |                               | 45  | 53  | 5   |
|  |               |    |  |                               | 41  | 33  | 25  |
|  |               |    |  |                               | -38 | 26  | 38  |
|  |               |    |  |                               | 35  | 28  | 35  |
|  |               |    |  |                               | -27 | 8   | 53  |
|  |               |    |  |                               | 31  | 2   | 53  |
|  |               |    |  |                               | 29  | -47 | 35  |
|  |               |    |  |                               | 5   | -41 | 37  |
|  |               |    |  |                               | 7   | -43 | 60  |
|  |               |    |  |                               | -1  | -63 | 51  |
|  |               |    |  |                               | -14 | -70 | 43  |
|  |               |    |  |                               | 16  | -58 | 55  |
|  |               |    |  |                               | 44  | -45 | 55  |
|  |               |    |  |                               | -36 | -60 | 42  |





|  |  |  |  |  |                            |     |     |     |
|--|--|--|--|--|----------------------------|-----|-----|-----|
|  |  |  |  |  |                            | -21 | 17  | -19 |
|  |  |  |  |  |                            | -23 | 43  | -17 |
|  |  |  |  |  |                            | 1   | 31  | -35 |
|  |  |  |  |  |                            | 8   | 50  | 8   |
|  |  |  |  |  |                            | -10 | 45  | -22 |
|  |  |  |  |  |                            | -23 | 51  | -5  |
|  |  |  |  |  |                            | -12 | 54  | 8   |
|  |  |  |  |  |                            | 9   | 55  | -10 |
|  |  |  |  |  |                            | 4   | 43  | 31  |
|  |  |  |  |  | Fixation - Pseudoword Pron | -42 | -74 | 21  |
|  |  |  |  |  |                            | 45  | -71 | 20  |
|  |  |  |  |  |                            | 13  | -56 | 50  |
|  |  |  |  |  |                            | 58  | -50 | 35  |
|  |  |  |  |  |                            | 43  | -32 | 29  |
|  |  |  |  |  |                            | 53  | -29 | 29  |
|  |  |  |  |  |                            | -52 | -44 | 37  |
|  |  |  |  |  |                            | 21  | -30 | 43  |
|  |  |  |  |  |                            | -3  | -50 | 23  |
|  |  |  |  |  |                            | -16 | -26 | 48  |
|  |  |  |  |  |                            | 48  | -18 | -31 |
|  |  |  |  |  |                            | 25  | -11 | -26 |
|  |  |  |  |  |                            | -23 | -5  | -26 |
|  |  |  |  |  |                            | -45 | 1   | -31 |
|  |  |  |  |  |                            | -24 | 21  | 43  |
|  |  |  |  |  |                            | 27  | 27  | 37  |
|  |  |  |  |  |                            | 5   | 33  | -35 |
|  |  |  |  |  |                            | -25 | 49  | 0   |
|  |  |  |  |  |                            | -14 | 47  | -22 |
|  |  |  |  |  |                            | 8   | 52  | 13  |
|  |  |  |  |  |                            | 7   | 52  | -19 |
|  |  |  |  |  | Fixation - Phonological    | 51  | -69 | 19  |
|  |  |  |  |  |                            | -46 | -67 | 25  |
|  |  |  |  |  |                            | -42 | -67 | 25  |
|  |  |  |  |  |                            | 60  | -47 | 26  |
|  |  |  |  |  |                            | 58  | -26 | 24  |
|  |  |  |  |  |                            | -5  | -50 | 18  |
|  |  |  |  |  |                            | -5  | -31 | 43  |
|  |  |  |  |  |                            | 53  | -21 | 10  |

|  |              |    |  |  |                             |     |     |     |
|--|--------------|----|--|--|-----------------------------|-----|-----|-----|
|  |              |    |  |  |                             | -29 | -5  | -26 |
|  |              |    |  |  |                             | 46  | -11 | -27 |
|  |              |    |  |  |                             | 46  | -10 | -18 |
|  |              |    |  |  |                             | -45 | 0   | -22 |
|  |              |    |  |  |                             | -24 | 29  | 38  |
|  |              |    |  |  |                             | -1  | 55  | 12  |
|  |              |    |  |  | Fixation - Orthographic     | 51  | -69 | 19  |
|  |              |    |  |  |                             | -46 | -63 | 25  |
|  |              |    |  |  |                             | 62  | -47 | 26  |
|  |              |    |  |  |                             | 62  | -44 | 30  |
|  |              |    |  |  |                             | 58  | -26 | 24  |
|  |              |    |  |  |                             | -7  | -48 | 23  |
|  |              |    |  |  |                             | -5  | -31 | 39  |
|  |              |    |  |  |                             | 6   | -53 | 36  |
|  |              |    |  |  |                             | -50 | -56 | 24  |
|  |              |    |  |  |                             | 55  | -19 | 5   |
|  |              |    |  |  |                             | -29 | -13 | -21 |
|  |              |    |  |  |                             | 48  | -11 | -22 |
|  |              |    |  |  |                             | 47  | -72 | 29  |
|  |              |    |  |  |                             | -47 | -5  | -21 |
|  |              |    |  |  |                             | -34 | -7  | -21 |
|  |              |    |  |  |                             | -24 | 25  | 43  |
|  |              |    |  |  |                             | 1   | 52  | -19 |
|  |              |    |  |  |                             | -14 | 56  | 4   |
|  |              |    |  |  |                             | 3   | 54  | 8   |
|  |              |    |  |  |                             | -3  | 56  | 8   |
|  | Li, 2003     | 20 |  |  | Rest > Conventional Acupur  | 3   | -82 | 16  |
|  |              |    |  |  |                             | -2  | -75 | 14  |
|  |              |    |  |  |                             | 52  | -18 | 12  |
|  |              |    |  |  |                             | -52 | -15 | 12  |
|  |              |    |  |  |                             | -50 | 40  | 16  |
|  |              |    |  |  |                             | 50  | 40  | 12  |
|  | Ingham, 2000 | 4  |  |  | Rest - Overt Solo, Controls | -26 | 16  | 46  |
|  |              |    |  |  |                             | 0   | -57 | 55  |
|  |              |    |  |  |                             | -57 | -28 | 31  |
|  |              |    |  |  |                             | 56  | -25 | 33  |
|  |              |    |  |  |                             | 69  | -34 | -16 |
|  |              |    |  |  |                             | -1  | 40  | 14  |

|  |                  |    |  |  |                              |     |     |     |
|--|------------------|----|--|--|------------------------------|-----|-----|-----|
|  |                  |    |  |  |                              | 1   | 41  | 0   |
|  |                  |    |  |  |                              | -38 | -4  | -10 |
|  |                  |    |  |  |                              | 44  | -16 | -8  |
|  |                  |    |  |  |                              | -23 | 7   | -13 |
|  |                  |    |  |  |                              | 30  | 3   | -12 |
|  |                  |    |  |  | Rest - Imagine Solo, Control | 0   | -56 | 48  |
|  |                  |    |  |  |                              | 51  | -6  | 4   |
|  |                  |    |  |  |                              | -55 | -15 | -18 |
|  |                  |    |  |  |                              | 55  | -43 | 17  |
|  |                  |    |  |  |                              | -1  | -51 | 32  |
|  |                  |    |  |  |                              | 5   | 37  | -16 |
|  |                  |    |  |  |                              | -42 | -13 | 6   |
|  |                  |    |  |  | Rest - Overt Chorus, Contro  | -2  | -10 | 64  |
|  |                  |    |  |  |                              | -29 | 15  | 46  |
|  |                  |    |  |  |                              | 11  | -39 | 64  |
|  |                  |    |  |  |                              | 58  | -26 | 33  |
|  |                  |    |  |  |                              | -55 | -40 | -11 |
|  |                  |    |  |  |                              | 62  | -54 | 22  |
|  |                  |    |  |  |                              | -10 | 42  | -9  |
|  |                  |    |  |  |                              | 5   | 37  | 10  |
|  |                  |    |  |  |                              | -42 | 20  | -1  |
|  |                  |    |  |  |                              | 44  | 18  | -12 |
|  |                  |    |  |  |                              | 27  | -94 | -18 |
|  |                  |    |  |  |                              | -12 | -40 | -7  |
|  |                  |    |  |  | Rest - Imagine Chorus, Cont  | -2  | -21 | 57  |
|  |                  |    |  |  |                              | -13 | -34 | 57  |
|  |                  |    |  |  |                              | -3  | -47 | 25  |
|  |                  |    |  |  |                              | 5   | 35  | -15 |
|  |                  |    |  |  |                              | -21 | 8   | -5  |
|  |                  |    |  |  |                              | -22 | -34 | -27 |
|  | Beauregard, 1997 | 10 |  |  | Baseline - Random Letters    | 1   | 17  | 38  |
|  |                  |    |  |  |                              | 67  | -37 | 21  |
|  |                  |    |  |  |                              | 5   | -48 | 50  |
|  |                  |    |  |  |                              | 1   | -56 | 34  |
|  |                  |    |  |  |                              | 4   | -55 | 56  |
|  |                  |    |  |  |                              | 56  | -54 | 14  |
|  |                  |    |  |  |                              | -3  | -56 | 64  |
|  |                  |    |  |  |                              | 11  | -49 | -11 |

|  |  |  |  |  |                            |     |     |     |
|--|--|--|--|--|----------------------------|-----|-----|-----|
|  |  |  |  |  | Baseline - Concrete Words  | 11  | -25 | 39  |
|  |  |  |  |  |                            | -5  | -58 | 58  |
|  |  |  |  |  |                            | -41 | -47 | -35 |
|  |  |  |  |  |                            | -3  | -3  | 39  |
|  |  |  |  |  |                            | 7   | -39 | 47  |
|  |  |  |  |  |                            | 5   | -44 | 48  |
|  |  |  |  |  |                            | -27 | -5  | 72  |
|  |  |  |  |  |                            | 1   | -74 | 31  |
|  |  |  |  |  |                            | -38 | -21 | 9   |
|  |  |  |  |  |                            | -5  | -68 | 42  |
|  |  |  |  |  |                            | -40 | -43 | 41  |
|  |  |  |  |  | Baseline - Abstract Words  | -41 | -44 | -36 |
|  |  |  |  |  |                            | 56  | -32 | 39  |
|  |  |  |  |  |                            | 13  | -24 | 39  |
|  |  |  |  |  |                            | -50 | -39 | 39  |
|  |  |  |  |  |                            | 67  | -40 | 21  |
|  |  |  |  |  |                            | 5   | -41 | 47  |
|  |  |  |  |  |                            | -47 | -41 | 40  |
|  |  |  |  |  |                            | -16 | -44 | -18 |
|  |  |  |  |  |                            | -25 | -8  | 72  |
|  |  |  |  |  |                            | -3  | -56 | 58  |
|  |  |  |  |  |                            | -60 | -39 | 34  |
|  |  |  |  |  |                            | -60 | -37 | 30  |
|  |  |  |  |  |                            | -11 | -67 | 49  |
|  |  |  |  |  | Baseline - Emotional Words | -37 | -45 | -35 |
|  |  |  |  |  |                            | 11  | -24 | 39  |
|  |  |  |  |  |                            | 60  | -25 | 17  |
|  |  |  |  |  |                            | 44  | -41 | 38  |
|  |  |  |  |  |                            | 9   | -32 | 45  |
|  |  |  |  |  |                            | 63  | -29 | 38  |
|  |  |  |  |  |                            | -36 | -41 | 41  |
|  |  |  |  |  |                            | -44 | -11 | 8   |
|  |  |  |  |  |                            | -47 | -8  | 8   |
|  |  |  |  |  |                            | -60 | -32 | 27  |
|  |  |  |  |  |                            | -1  | -74 | 33  |
|  |  |  |  |  |                            | 21  | -64 | 20  |
|  |  |  |  |  |                            | -5  | -73 | 34  |
|  |  |  |  |  |                            | -3  | -71 | 34  |

|  |               |    |  |  |                              |     |      |     |
|--|---------------|----|--|--|------------------------------|-----|------|-----|
|  |               |    |  |  |                              | 5   | -48  | 50  |
|  |               |    |  |  |                              | 5   | -44  | 48  |
|  |               |    |  |  |                              | 52  | -66  | 11  |
|  |               |    |  |  |                              | 60  | -28  | 27  |
|  |               |    |  |  | Baseline - Random-Letters I  | 11  | -24  | 41  |
|  |               |    |  |  |                              | -43 | -45  | -35 |
|  |               |    |  |  | Baseline - Word Instructions | -44 | -42  | -35 |
|  |               |    |  |  |                              | 23  | -100 | -14 |
|  |               |    |  |  |                              | 55  | -50  | 0   |
|  |               |    |  |  |                              | 43  | -25  | -35 |
|  |               |    |  |  |                              | 50  | -34  | -32 |
|  | Gemar, 1996   | 11 |  |  | Rest - Sad Mood              | 44  | 52   | 7   |
|  |               | 11 |  |  | Rest - Neutral Recall        | 49  | 40   | 17  |
|  |               |    |  |  |                              | -21 | -91  | -27 |
|  | Tatsumi, 1999 | 6  |  |  | Rest - Verb Generation, Poo  | 60  | -24  | 24  |
|  |               |    |  |  |                              | 15  | -64  | 33  |
|  |               |    |  |  |                              | 12  | 64   | -7  |
|  | Fiez, 1995    | 10 |  |  | Fixation - Auditory Target D | -21 | -76  | 32  |
|  |               |    |  |  |                              | 28  | -71  | 33  |
|  |               |    |  |  |                              | 25  | -49  | 50  |
|  |               |    |  |  |                              | -42 | -22  | 44  |
|  |               |    |  |  |                              | 56  | -25  | 40  |
|  |               |    |  |  |                              | -42 | -66  | 17  |
|  |               |    |  |  |                              | 45  | -54  | 21  |
|  |               |    |  |  |                              | 42  | -74  | 19  |
|  | Fiez, 1996    | 12 |  |  | Negative Changes in Short T  | 9   | -18  | 51  |
|  |               |    |  |  |                              | 19  | -3   | -9  |
|  |               |    |  |  |                              | -14 | -47  | 32  |
|  |               |    |  |  |                              | 39  | -21  | -3  |
|  |               |    |  |  |                              | -26 | -14  | -12 |
|  |               |    |  |  |                              | 48  | -5   | 0   |
|  |               |    |  |  |                              | 26  | 6    | 8   |
|  |               |    |  |  |                              | 51  | -13  | 57  |
|  |               |    |  |  |                              | -47 | -19  | 3   |
|  |               |    |  |  |                              | 43  | -14  | 27  |
|  |               |    |  |  |                              | 29  | -31  | 25  |
|  |               |    |  |  |                              | -54 | -86  | 16  |
|  |               |    |  |  |                              | 44  | -53  | 20  |

|  |                |   |  |  |                              |     |      |     |
|--|----------------|---|--|--|------------------------------|-----|------|-----|
|  |                |   |  |  |                              | 39  | -84  | 14  |
|  |                |   |  |  |                              | -7  | -20  | 58  |
|  |                |   |  |  |                              | 5   | -54  | 30  |
|  |                |   |  |  |                              | 65  | -42  | 25  |
|  |                |   |  |  |                              | -50 | -21  | 61  |
|  |                |   |  |  |                              | -34 | -32  | 19  |
|  |                |   |  |  |                              | 39  | -101 | 9   |
|  |                |   |  |  |                              | -30 | -95  | 5   |
|  |                |   |  |  |                              | -32 | -82  | 31  |
|  |                |   |  |  |                              | 18  | -61  | 3   |
|  |                |   |  |  |                              | -23 | -33  | 48  |
|  |                |   |  |  | Negative Changes in Silent C | -17 | 43   | -6  |
|  |                |   |  |  |                              | -34 | 24   | -2  |
|  | Nunneley, 2002 | 9 |  |  | Rest - Heating               | -23 | -2   | 11  |
|  |                |   |  |  |                              | 17  | -61  | 12  |
|  |                |   |  |  |                              | 12  | -102 | 10  |
|  |                |   |  |  |                              | 27  | -87  | -12 |
|  |                |   |  |  |                              | -35 | -33  | 21  |
|  |                |   |  |  |                              | -44 | -23  | 16  |
|  |                |   |  |  |                              | 19  | -71  | 26  |
|  |                |   |  |  |                              | -46 | -35  | 20  |
|  |                |   |  |  |                              | -14 | -98  | -10 |
|  |                |   |  |  |                              | -25 | -12  | 11  |
|  |                |   |  |  |                              | 29  | -10  | 12  |
|  |                |   |  |  |                              | -13 | -75  | 28  |
|  |                |   |  |  |                              | -14 | 3    | 18  |
|  |                |   |  |  |                              | 6   | -90  | 21  |
|  | Bodegard, 2000 | 6 |  |  | Rest > Somatosensory Discr   | -34 | -82  | 24  |
|  |                |   |  |  |                              | -18 | -85  | 22  |
|  |                |   |  |  |                              | 0   | -66  | 17  |
|  |                |   |  |  |                              | 26  | -83  | 21  |
|  |                |   |  |  |                              | 36  | -80  | 13  |
|  | Mirz, 1999     | 5 |  |  | Continuous White Noise > B   | 1   | -66  | 33  |
|  |                |   |  |  | Continuous Pure Tone > Bas   | 1   | -62  | 30  |
|  |                |   |  |  | Tone Pulse Trains > Baseline | -1  | -51  | 51  |
|  |                |   |  |  |                              | 60  | -52  | 38  |
|  |                |   |  |  |                              | 44  | -65  | 35  |
|  |                |   |  |  |                              | -4  | -29  | 49  |

|  |              |  |    |  |                               |     |     |     |
|--|--------------|--|----|--|-------------------------------|-----|-----|-----|
|  |              |  |    |  | Tone Pulse Trains, Baseline   | 1   | -69 | 33  |
|  |              |  |    |  |                               | 15  | -35 | 69  |
|  |              |  |    |  |                               | -4  | -27 | 43  |
|  |              |  |    |  | Single Words > Baseline, De   | 1   | -47 | 47  |
|  |              |  |    |  |                               | -3  | -34 | 46  |
|  |              |  |    |  |                               | 58  | -50 | 34  |
|  |              |  |    |  |                               | 43  | -44 | -14 |
|  |              |  |    |  |                               | -42 | -71 | 33  |
|  |              |  |    |  |                               | 28  | 36  | 52  |
|  |              |  |    |  | Standardized Speech > Base    | 11  | -64 | 53  |
|  |              |  |    |  |                               | 53  | -59 | -3  |
|  |              |  |    |  |                               | -7  | -56 | 29  |
|  |              |  |    |  | Classical Music > Baseline, D | 58  | -43 | 36  |
|  |              |  |    |  |                               | -11 | -41 | 48  |
|  |              |  |    |  |                               | 1   | -68 | 36  |
|  |              |  |    |  |                               | -7  | -39 | 48  |
|  |              |  |    |  |                               | 49  | -61 | 34  |
|  | Murtha, 1999 |  | 10 |  | Abstract Patterns - Baseline  | -12 | -69 | 18  |
|  |              |  |    |  |                               | -23 | -85 | 33  |
|  |              |  |    |  |                               | -20 | -83 | 31  |
|  |              |  |    |  |                               | 39  | -85 | 40  |
|  |              |  |    |  |                               | 47  | -73 | -5  |
|  |              |  |    |  |                               | -25 | -54 | -8  |
|  |              |  |    |  |                               | -20 | -49 | -3  |
|  |              |  |    |  |                               | 52  | -62 | 11  |
|  |              |  |    |  |                               | 64  | -59 | 0   |
|  |              |  |    |  |                               | -1  | -56 | 48  |
|  |              |  |    |  |                               | 61  | -24 | 38  |
|  | Murtha, 1999 |  | 10 |  | Abstract Patterns - Anticipa  | -3  | -56 | 49  |
|  |              |  |    |  |                               | -5  | -55 | 49  |
|  |              |  |    |  |                               | -5  | -60 | 48  |
|  |              |  |    |  |                               | -5  | -67 | 51  |
|  |              |  |    |  |                               | -11 | -56 | 48  |
|  |              |  |    |  |                               | -5  | -67 | 55  |
|  |              |  |    |  |                               | -4  | -60 | 57  |
|  |              |  |    |  |                               | -9  | -74 | -59 |
|  |              |  |    |  |                               | -1  | -58 | 57  |
|  |              |  |    |  |                               | 21  | -57 | 35  |

|  |  |  |  |  |                              |     |     |     |
|--|--|--|--|--|------------------------------|-----|-----|-----|
|  |  |  |  |  |                              | 27  | -64 | 42  |
|  |  |  |  |  |                              | 68  | -18 | 35  |
|  |  |  |  |  | Picture Naming - Baseline (0 | -55 | -61 | 15  |
|  |  |  |  |  |                              | -59 | -19 | -27 |
|  |  |  |  |  |                              | -65 | -54 | -8  |
|  |  |  |  |  |                              | 59  | -57 | -2  |
|  |  |  |  |  |                              | 56  | -57 | -3  |
|  |  |  |  |  |                              | 59  | -26 | 18  |
|  |  |  |  |  |                              | 55  | -64 | 15  |
|  |  |  |  |  |                              | 0   | 36  | -24 |
|  |  |  |  |  |                              | 37  | 33  | 41  |
|  |  |  |  |  |                              | -59 | -39 | 42  |
|  |  |  |  |  |                              | -64 | -34 | 29  |
|  |  |  |  |  |                              | 1   | -58 | 48  |
|  |  |  |  |  |                              | 61  | -29 | 41  |
|  |  |  |  |  |                              | 43  | -43 | 42  |
|  |  |  |  |  |                              | 0   | -59 | 57  |
|  |  |  |  |  | Picture Naming - Anticipat   | -12 | 47  | -10 |
|  |  |  |  |  |                              | -7  | 49  | -6  |
|  |  |  |  |  |                              | 36  | 37  | 38  |
|  |  |  |  |  |                              | 56  | 7   | 23  |
|  |  |  |  |  |                              | 4   | 43  | -3  |
|  |  |  |  |  |                              | -9  | -17 | 47  |
|  |  |  |  |  |                              | -4  | -55 | 49  |
|  |  |  |  |  |                              | -1  | -56 | 45  |
|  |  |  |  |  |                              | -4  | -55 | 52  |
|  |  |  |  |  |                              | -4  | -53 | 54  |
|  |  |  |  |  |                              | -3  | -60 | 57  |
|  |  |  |  |  |                              | -59 | -37 | 42  |
|  |  |  |  |  |                              | 9   | -32 | 39  |
|  |  |  |  |  |                              | 7   | -38 | 21  |
|  |  |  |  |  |                              | 69  | -26 | 27  |
|  |  |  |  |  |                              | 67  | -25 | 30  |
|  |  |  |  |  |                              | 60  | -27 | 38  |
|  |  |  |  |  |                              | -61 | -30 | 29  |
|  |  |  |  |  | Semantic Judgment - Baseli   | 51  | 19  | -36 |
|  |  |  |  |  |                              | 54  | -23 | -25 |
|  |  |  |  |  |                              | -1  | 37  | -10 |



|  |  |  |  |  |                               |     |     |     |
|--|--|--|--|--|-------------------------------|-----|-----|-----|
|  |  |  |  |  |                               | 35  | 33  | 43  |
|  |  |  |  |  |                               | 0   | 64  | 11  |
|  |  |  |  |  |                               | 4   | 64  | 14  |
|  |  |  |  |  |                               | 1   | 55  | -25 |
|  |  |  |  |  |                               | 0   | 29  | -22 |
|  |  |  |  |  |                               | 3   | 22  | -18 |
|  |  |  |  |  |                               | 63  | -45 | 32  |
|  |  |  |  |  |                               | 63  | -44 | 35  |
|  |  |  |  |  |                               | 63  | -37 | 38  |
|  |  |  |  |  |                               | 57  | -26 | 23  |
|  |  |  |  |  |                               | 59  | -56 | 24  |
|  |  |  |  |  |                               | 3   | -56 | 47  |
|  |  |  |  |  |                               | 60  | -52 | 9   |
|  |  |  |  |  | Semantic Judgment - Antici    | -13 | -56 | 6   |
|  |  |  |  |  |                               | -1  | 59  | 7   |
|  |  |  |  |  |                               | -3  | 52  | -10 |
|  |  |  |  |  |                               | -25 | 9   | 62  |
|  |  |  |  |  |                               | 1   | 18  | -10 |
|  |  |  |  |  |                               | 3   | 27  | -21 |
|  |  |  |  |  |                               | 33  | 31  | 43  |
|  |  |  |  |  |                               | 32  | 33  | 46  |
|  |  |  |  |  |                               | 30  | 31  | 50  |
|  |  |  |  |  |                               | 39  | 21  | 31  |
|  |  |  |  |  |                               | 13  | 61  | -4  |
|  |  |  |  |  |                               | 1   | -48 | 32  |
|  |  |  |  |  |                               | 0   | -68 | 30  |
|  |  |  |  |  |                               | 1   | -25 | 45  |
|  |  |  |  |  |                               | 1   | -27 | 45  |
|  |  |  |  |  |                               | 55  | -16 | 16  |
|  |  |  |  |  | Abstract Patterns Anticipati  | -27 | -62 | -7  |
|  |  |  |  |  |                               | 38  | 17  | -33 |
|  |  |  |  |  |                               | 36  | 10  | 4   |
|  |  |  |  |  |                               | 1   | 34  | -22 |
|  |  |  |  |  | Picture Anticipation - Baseli | -33 | -75 | -35 |
|  |  |  |  |  |                               | 40  | 17  | -30 |
|  |  |  |  |  |                               | -5  | 58  | -22 |
|  |  |  |  |  |                               | 7   | 41  | -27 |
|  |  |  |  |  | Semantic Judgment Anticipa    | -1  | 55  | -25 |

|  |                |    |  |  |                              |     |      |     |
|--|----------------|----|--|--|------------------------------|-----|------|-----|
|  |                |    |  |  |                              | 44  | -74  | -6  |
|  | Kumari, 2003   | 6  |  |  | Rest > Pulse, Normals        | -2  | 58   | 2   |
|  |                |    |  |  |                              | -2  | 44   | 14  |
|  |                |    |  |  |                              | 8   | -64  | 4   |
|  |                |    |  |  |                              | -44 | -20  | 56  |
|  |                |    |  |  |                              | -46 | -30  | 56  |
|  |                |    |  |  |                              | -36 | -38  | 62  |
|  |                |    |  |  |                              | 46  | -22  | 54  |
|  |                |    |  |  |                              | 50  | -14  | 52  |
|  |                |    |  |  |                              | 32  | -24  | 50  |
|  |                |    |  |  |                              | -62 | -12  | 22  |
|  |                |    |  |  |                              | -58 | -8   | 10  |
|  |                |    |  |  |                              | -60 | -14  | -8  |
|  |                |    |  |  |                              | 58  | -12  | 34  |
|  |                |    |  |  |                              | 54  | -4   | 34  |
|  |                |    |  |  |                              | 60  | -10  | 22  |
|  |                |    |  |  |                              | 48  | -54  | 18  |
|  |                |    |  |  |                              | 56  | -62  | 24  |
|  |                |    |  |  |                              | 40  | -56  | 18  |
|  |                |    |  |  |                              | -42 | -68  | 16  |
|  |                |    |  |  |                              | -46 | -74  | -4  |
|  |                |    |  |  |                              | -4  | -58  | 16  |
|  |                |    |  |  |                              | -2  | -68  | 18  |
|  |                |    |  |  |                              | 4   | -60  | 18  |
|  | Calhoun, 2001  | 10 |  |  | Figure Selection > Fixation, | -51 | -62  | 40  |
|  |                |    |  |  |                              | 52  | -46  | 26  |
|  | Anderson, 1994 | 8  |  |  | Reflexive Saccades > Fixatio | -36 | 19   | -19 |
|  |                |    |  |  |                              | 42  | 22   | -16 |
|  |                |    |  |  |                              | -27 | -97  | 1   |
|  |                |    |  |  |                              | 30  | -96  | 4   |
|  |                |    |  |  |                              | -22 | 52   | 31  |
|  |                |    |  |  |                              | 20  | 58   | 7   |
|  |                |    |  |  |                              | -3  | 48   | 9   |
|  |                |    |  |  | Remembered Saccades > Fix    | -36 | -34  | -14 |
|  |                |    |  |  |                              | 31  | -24  | -21 |
|  |                |    |  |  |                              | -20 | -101 | 1   |
|  |                |    |  |  |                              | 30  | -96  | 4   |
|  |                |    |  |  |                              | -22 | 50   | 31  |

|  |                 |    |  |  |                              |     |     |     |
|--|-----------------|----|--|--|------------------------------|-----|-----|-----|
|  |                 |    |  |  |                              | -4  | 39  | -17 |
|  | Braver, 2003    | 13 |  |  | Mixed State > Fixation, Decr | -42 | 33  | -7  |
|  | Sweeney, 1996   | 11 |  |  | Visually Guided Saccades - F | -27 | 32  | 24  |
|  |                 |    |  |  |                              | 38  | 30  | 23  |
|  | Heim, 2002      | 12 |  |  | BASE - NULL, Deactivations   | -38 | 13  | 34  |
|  | Doricchi, 1997  | 10 |  |  | Fixation > Fast-Regular      | -16 | 25  | -2  |
|  |                 |    |  |  |                              | 19  | 18  | 16  |
|  |                 |    |  |  |                              | -18 | -20 | 16  |
|  |                 |    |  |  |                              | 9   | 2   | -27 |
|  |                 |    |  |  |                              | -11 | -32 | 53  |
|  |                 |    |  |  |                              | 26  | -32 | 52  |
|  |                 |    |  |  |                              | 38  | -86 | -1  |
|  |                 |    |  |  | Fixation > Antisaccades      | -16 | 21  | -6  |
|  |                 |    |  |  |                              | 5   | 39  | -17 |
|  |                 |    |  |  |                              | -40 | -85 | 9   |
|  |                 |    |  |  |                              | 42  | -81 | 3   |
|  |                 |    |  |  |                              | -49 | -22 | -24 |
|  |                 |    |  |  |                              | 46  | -41 | -24 |
|  |                 |    |  |  |                              | -64 | -45 | 5   |
|  |                 |    |  |  |                              | 62  | -23 | 6   |
|  |                 |    |  |  |                              | 12  | 4   | -28 |
|  |                 |    |  |  |                              | -14 | -25 | 7   |
|  | Bestmann, 2004  | 12 |  |  | Rest - Suprathreshold rTMS   | 3   | -31 | 61  |
|  |                 |    |  |  |                              | 44  | -24 | 58  |
|  |                 |    |  |  |                              | 20  | -84 | 30  |
|  |                 |    |  |  |                              | 33  | -84 | 18  |
|  |                 |    |  |  | Rest - Subthreshold rTMS     | 2   | -25 | 62  |
|  |                 |    |  |  |                              | 3   | -84 | 19  |
|  |                 |    |  |  |                              | 40  | -25 | 57  |
|  |                 |    |  |  |                              | 17  | -85 | 36  |
|  |                 |    |  |  |                              | 34  | -82 | 13  |
|  | Christoff, 2004 | 12 |  |  | Rest > Arrows                | 40  | 12  | -28 |
|  |                 |    |  |  |                              | -38 | 8   | -20 |
|  |                 |    |  |  |                              | -14 | -44 | -16 |
|  |                 |    |  |  |                              | 12  | -40 | -12 |
|  |                 |    |  |  |                              | 24  | -18 | -36 |
|  |                 |    |  |  |                              | -40 | 50  | 20  |
|  |                 |    |  |  |                              | 72  | -24 | 28  |



|  |               |    |  |  |                            |     |     |     |
|--|---------------|----|--|--|----------------------------|-----|-----|-----|
|  |               |    |  |  |                            | -51 | -69 | 30  |
|  |               |    |  |  |                            | 0   | 30  | -12 |
|  | Napadow, 2005 | 13 |  |  | Manual, Decreases          | -18 | -9  | -25 |
|  |               |    |  |  |                            | 19  | -15 | -20 |
|  |               |    |  |  |                            | -18 | -13 | -24 |
|  |               |    |  |  |                            | -5  | 30  | -13 |
|  |               |    |  |  |                            | -6  | 70  | 1   |
|  |               |    |  |  |                            | 3   | 51  | -16 |
|  |               |    |  |  |                            | -2  | 51  | -17 |
|  |               |    |  |  |                            | 7   | 55  | 29  |
|  |               |    |  |  |                            | -4  | 53  | 9   |
|  |               |    |  |  |                            | 33  | 20  | -31 |
|  |               |    |  |  |                            | -53 | 14  | -19 |
|  |               |    |  |  | 2-Hz Electroacupuncture, D | -16 | -9  | -25 |
|  |               |    |  |  |                            | 29  | -18 | -16 |
|  |               |    |  |  |                            | 4   | 23  | -8  |
|  |               |    |  |  |                            | 6   | 12  | -10 |
|  |               |    |  |  |                            | 5   | 64  | -21 |
|  |               |    |  |  |                            | -1  | 67  | 0   |
|  |               |    |  |  |                            | 3   | 35  | -18 |
|  |               |    |  |  |                            | -1  | 35  | -18 |
|  |               |    |  |  |                            | -26 | 16  | -36 |
|  |               |    |  |  | 100-Hz Electroacupuncture, | -21 | -3  | -27 |
|  |               |    |  |  |                            | 38  | 50  | -15 |
|  |               |    |  |  |                            | -35 | 38  | -18 |
|  |               |    |  |  |                            | 2   | 31  | -12 |
|  |               |    |  |  |                            | -3  | -50 | 24  |
|  |               |    |  |  |                            | 5   | -11 | -7  |
|  |               |    |  |  |                            | -1  | 65  | -18 |
|  |               |    |  |  |                            | 6   | 66  | 1   |
|  |               |    |  |  |                            | -1  | 66  | -2  |
|  |               |    |  |  |                            | 3   | 42  | -21 |
|  |               |    |  |  |                            | -1  | 42  | -21 |
|  |               |    |  |  |                            | 44  | 12  | -44 |
|  |               |    |  |  |                            | -44 | 11  | -35 |
|  | Hui, 2005     | 11 |  |  | Deqi Only, Deactivations   | 28  | -8  | -24 |
|  |               |    |  |  |                            | -25 | -3  | -25 |
|  |               |    |  |  |                            | 38  | -23 | -13 |



|  |  |  |  |  |  |     |     |     |
|--|--|--|--|--|--|-----|-----|-----|
|  |  |  |  |  |  | -2  | -12 | 67  |
|  |  |  |  |  |  | 13  | -20 | -14 |
|  |  |  |  |  |  | -3  | -21 | -19 |
|  |  |  |  |  |  | 5   | -34 | -32 |
|  |  |  |  |  |  | -5  | -32 | -36 |
|  |  |  |  |  |  | 6   | -20 | -34 |
|  |  |  |  |  |  | 0   | -25 | -34 |
|  |  |  |  |  |  | 1   | -40 | -15 |
|  |  |  |  |  |  | -1  | -58 | -1  |
|  |  |  |  |  |  | 3   | -76 | -13 |
|  |  |  |  |  |  | -1  | -76 | -14 |
|  |  |  |  |  |  | 5   | -78 | -36 |
|  |  |  |  |  |  | 3   | -68 | -36 |
|  |  |  |  |  |  | 10  | -69 | -48 |
|  |  |  |  |  |  | 2   | -59 | -40 |
|  |  |  |  |  |  | -2  | -52 | -33 |
|  |  |  |  |  |  | 1   | -48 | -33 |
|  |  |  |  |  |  | 29  | -35 | -27 |
|  |  |  |  |  |  | -8  | -40 | -12 |
|  |  |  |  |  |  | 17  | -53 | -14 |
|  |  |  |  |  |  | -16 | -53 | -13 |
|  |  |  |  |  |  | 17  | -89 | -24 |
|  |  |  |  |  |  | -15 | -92 | -18 |
|  |  |  |  |  |  | 20  | -84 | -34 |
|  |  |  |  |  |  | -12 | -77 | -31 |
|  |  |  |  |  |  | 15  | -85 | -45 |
|  |  |  |  |  |  | -10 | -74 | -31 |
|  |  |  |  |  |  | 12  | -65 | -39 |
|  |  |  |  |  |  | -15 | -57 | -59 |
|  |  |  |  |  |  | 7   | -72 | -42 |
|  |  |  |  |  |  | -6  | -60 | -56 |
|  |  |  |  |  |  | -23 | -43 | -43 |
|  |  |  |  |  |  | 41  | -42 | -31 |
|  |  |  |  |  |  | -29 | -35 | -28 |
|  |  |  |  |  |  | 39  | -42 | -32 |
|  |  |  |  |  |  | -22 | -47 | -32 |
|  |  |  |  |  |  | 41  | -48 | -34 |
|  |  |  |  |  |  | -38 | -43 | -38 |

|  |                 |   |  |  |                             |     |     |     |
|--|-----------------|---|--|--|-----------------------------|-----|-----|-----|
|  |                 |   |  |  |                             | -33 | -73 | -45 |
|  |                 |   |  |  |                             | 22  | -70 | -53 |
|  |                 |   |  |  |                             | -38 | -50 | -47 |
|  |                 |   |  |  |                             | 31  | -40 | -43 |
|  |                 |   |  |  |                             | -37 | -53 | -47 |
|  |                 |   |  |  |                             | 3   | -54 | -26 |
|  |                 |   |  |  |                             | 12  | -61 | -30 |
|  |                 |   |  |  |                             | -20 | -51 | -29 |
|  |                 |   |  |  | Deqi + Pain, Deactivations  | 37  | 11  | -40 |
|  |                 |   |  |  |                             | -37 | 0   | -44 |
|  |                 |   |  |  |                             | 10  | 68  | -3  |
|  |                 |   |  |  |                             | -4  | 65  | -2  |
|  |                 |   |  |  |                             | 3   | 15  | -24 |
|  |                 |   |  |  |                             | 59  | -55 | 39  |
|  |                 |   |  |  |                             | 42  | -49 | -45 |
|  |                 |   |  |  | Sensory, Deactivations      | 4   | 33  | -15 |
|  |                 |   |  |  |                             | -10 | 66  | -11 |
|  |                 |   |  |  |                             | 6   | 18  | -21 |
|  |                 |   |  |  |                             | 4   | 13  | -18 |
|  |                 |   |  |  |                             | 3   | -83 | -38 |
|  | Paulesu, 1997   | 6 |  |  | Rest > Verbal Fluency       | 56  | -69 | 24  |
|  |                 |   |  |  |                             | 64  | -47 | 26  |
|  |                 |   |  |  |                             | -52 | -64 | 30  |
|  |                 |   |  |  |                             | -63 | -39 | 27  |
|  |                 |   |  |  |                             | -61 | -24 | 21  |
|  |                 |   |  |  |                             | -3  | -56 | 28  |
|  |                 |   |  |  |                             | 10  | -66 | 29  |
|  |                 |   |  |  |                             | -7  | -75 | 30  |
|  | Eyler, 2004     | 9 |  |  | Fixation > Vigilance, Norma | 30  | -36 | 53  |
|  |                 |   |  |  |                             | -3  | -27 | 69  |
|  |                 |   |  |  |                             | 33  | -5  | -45 |
|  |                 |   |  |  |                             | -47 | 45  | 3   |
|  |                 |   |  |  |                             | -31 | -20 | 48  |
|  | Warburton, 1996 | 9 |  |  | Rest > Verb-Noun Comparis   | -48 | -34 | 5   |
|  |                 |   |  |  |                             | -51 | -44 | -9  |
|  |                 |   |  |  |                             | -51 | -2  | 2   |
|  |                 |   |  |  |                             | -44 | 7   | -7  |
|  |                 |   |  |  |                             | -40 | 23  | -4  |



|  |              |    |  |  |                             |     |     |     |
|--|--------------|----|--|--|-----------------------------|-----|-----|-----|
|  |              |    |  |  |                             | 62  | -32 | 0   |
|  |              |    |  |  |                             | 57  | -5  | -5  |
|  |              |    |  |  |                             | 38  | 7   | 8   |
|  |              |    |  |  | Rest > Verb Generation, Gro | -40 | -78 | -1  |
|  |              |    |  |  |                             | 34  | -61 | -13 |
|  |              |    |  |  |                             | 47  | -65 | 19  |
|  |              |    |  |  |                             | 45  | -16 | 32  |
|  |              |    |  |  |                             | 14  | 46  | 31  |
|  |              |    |  |  |                             | -1  | -67 | 24  |
|  |              |    |  |  |                             | 15  | -39 | 44  |
|  |              |    |  |  |                             | -9  | -30 | 48  |
|  |              |    |  |  |                             | 7   | 46  | -9  |
|  | Smeets, 2006 | 12 |  |  | Satiation with Chocolate in | -54 | -34 | 54  |
|  |              |    |  |  |                             | -42 | -46 | 62  |
|  |              |    |  |  |                             | 0   | 26  | 46  |
|  |              |    |  |  | Satiation with Chocolate in | 2   | -4  | -4  |
|  |              |    |  |  |                             | -18 | -6  | -22 |
|  | Ghatan, 1995 | 8  |  |  | Perceptual Maze > Rest, De  | 23  | 59  | 31  |
|  |              |    |  |  |                             | 8   | 62  | 9   |
|  |              |    |  |  |                             | 6   | 50  | -21 |
|  |              |    |  |  |                             | 33  | 22  | -21 |
|  |              |    |  |  |                             | 6   | 49  | -16 |
|  |              |    |  |  |                             | 7   | -31 | 30  |
|  |              |    |  |  |                             | 5   | -36 | 30  |
|  |              |    |  |  |                             | 61  | -8  | 9   |
|  |              |    |  |  |                             | 61  | -7  | 12  |
|  |              |    |  |  |                             | 56  | 16  | -24 |
|  |              |    |  |  |                             | 53  | -33 | 22  |
|  |              |    |  |  |                             | 63  | -49 | 27  |
|  |              |    |  |  |                             | 63  | 20  | 20  |
|  |              |    |  |  |                             | -7  | 63  | 23  |
|  |              |    |  |  |                             | -4  | 62  | 10  |
|  |              |    |  |  |                             | -5  | 48  | -20 |
|  |              |    |  |  |                             | -58 | 29  | 7   |
|  |              |    |  |  |                             | -53 | 27  | -15 |
|  |              |    |  |  |                             | -5  | 49  | -16 |
|  |              |    |  |  |                             | -11 | -25 | 30  |
|  |              |    |  |  |                             | -2  | -38 | 31  |

|  |                   |    |  |  |                              |     |     |     |
|--|-------------------|----|--|--|------------------------------|-----|-----|-----|
|  |                   |    |  |  |                              | -58 | -8  | 11  |
|  |                   |    |  |  |                              | -65 | -22 | 13  |
|  |                   |    |  |  |                              | -58 | -40 | 17  |
|  |                   |    |  |  |                              | -58 | -50 | 26  |
|  |                   |    |  |  |                              | -60 | -55 | 30  |
|  |                   |    |  |  |                              | -62 | -12 | 26  |
|  |                   |    |  |  | Motor Control > Rest, Decre  | 4   | 47  | -9  |
|  |                   |    |  |  |                              | 4   | 41  | -9  |
|  |                   |    |  |  |                              | 41  | -8  | 9   |
|  |                   |    |  |  |                              | 7   | -48 | 41  |
|  |                   |    |  |  |                              | -7  | 49  | -9  |
|  |                   |    |  |  |                              | -2  | 41  | -9  |
|  |                   |    |  |  |                              | -60 | -28 | 27  |
|  |                   |    |  |  |                              | -4  | -53 | 42  |
|  | Pfefferbaum, 2001 | 10 |  |  | Rest > 2-Back, Controls      | -7  | 69  | 1   |
|  |                   |    |  |  |                              | -1  | 58  | 14  |
|  |                   |    |  |  |                              | 8   | 67  | -12 |
|  |                   |    |  |  |                              | 9   | 69  | 2   |
|  |                   |    |  |  |                              | 17  | 71  | -2  |
|  |                   |    |  |  |                              | -8  | -47 | 8   |
|  |                   |    |  |  |                              | -4  | -61 | 15  |
|  |                   |    |  |  |                              | -4  | -53 | 22  |
|  |                   |    |  |  |                              | -12 | -57 | 25  |
|  |                   |    |  |  |                              | 18  | -56 | 31  |
|  |                   |    |  |  |                              | 12  | -63 | 31  |
|  |                   |    |  |  |                              | 6   | -30 | 59  |
|  |                   |    |  |  |                              | 2   | -39 | 69  |
|  |                   |    |  |  |                              | -6  | -26 | 58  |
|  |                   |    |  |  | Rest > Match-to-Center, Co   | 5   | -68 | 38  |
|  |                   |    |  |  |                              | 12  | -62 | 33  |
|  |                   |    |  |  |                              | 11  | -61 | 9   |
|  |                   |    |  |  |                              | -12 | -65 | 17  |
|  |                   |    |  |  |                              | -7  | -69 | 0   |
|  |                   |    |  |  |                              | -27 | -58 | 39  |
|  | Egan, 2003        | 10 |  |  | Infusion > Rest, Deactivatio | 6   | -54 | -28 |
|  |                   |    |  |  |                              | 22  | -38 | 12  |
|  |                   |    |  |  |                              | 4   | -8  | -18 |
|  |                   |    |  |  |                              | 12  | 2   | 18  |

|  |                            |    |  |  |                              |     |     |     |
|--|----------------------------|----|--|--|------------------------------|-----|-----|-----|
|  |                            |    |  |  |                              | -1  | -52 | -36 |
|  |                            |    |  |  |                              | -2  | 8   | 6   |
|  |                            |    |  |  |                              | -20 | -18 | 22  |
|  |                            |    |  |  |                              | -8  | 10  | 0   |
|  |                            |    |  |  |                              | -44 | -44 | -10 |
|  |                            |    |  |  |                              | 1   | -42 | 28  |
|  |                            |    |  |  |                              | -6  | 18  | 44  |
|  |                            |    |  |  |                              | 4   | 32  | 38  |
|  |                            |    |  |  |                              | 32  | 2   | 32  |
|  |                            |    |  |  |                              | 12  | 10  | -16 |
|  |                            |    |  |  |                              | 21  | 34  | 6   |
|  |                            |    |  |  |                              | 18  | 30  | -6  |
|  | Denton, 1999               | 10 |  |  | Maximum Thirst, Deactivati   | 18  | -6  | -18 |
|  |                            |    |  |  |                              | 7   | -14 | 15  |
|  |                            |    |  |  |                              | -1  | -10 | 12  |
|  | Georgiou-Karistianis, 2007 | 17 |  |  | Simon Task Deactivations, N  | -6  | 38  | 14  |
|  |                            |    |  |  |                              | 2   | 40  | 10  |
|  |                            |    |  |  |                              | -4  | -36 | 40  |
|  |                            |    |  |  |                              | 4   | -42 | 28  |
|  | Hamdy, 1999                | 8  |  |  | Decreased rCBF During Volit  | 8   | 52  | 22  |
|  |                            |    |  |  |                              | -38 | 6   | 40  |
|  |                            |    |  |  |                              | 50  | -14 | -10 |
|  |                            |    |  |  |                              | -60 | -22 | 2   |
|  |                            |    |  |  |                              | 14  | -46 | 72  |
|  |                            |    |  |  |                              | -16 | -44 | 72  |
|  |                            |    |  |  |                              | 62  | -50 | 6   |
|  | Harris, 2005               | 8  |  |  | Deactivations During Volitic | 36  | 4   | 28  |
|  |                            |    |  |  |                              | 2   | 12  | -22 |
|  |                            |    |  |  |                              | 60  | 34  | 0   |
|  |                            |    |  |  |                              | -20 | 40  | -8  |
|  |                            |    |  |  |                              | -60 | 22  | 12  |
|  |                            |    |  |  |                              | 46  | -46 | -18 |
|  |                            |    |  |  |                              | 54  | 6   | -18 |
|  |                            |    |  |  |                              | -68 | -30 | -10 |
|  |                            |    |  |  |                              | -36 | -32 | 18  |
|  |                            |    |  |  |                              | -2  | -44 | -16 |
|  | Carlsson, 2000             | 7  |  |  | Rest > Tickle                | 24  | 20  | 32  |
|  |                            |    |  |  |                              | -32 | 60  | 4   |

|  |               |    |  |  |                             |     |     |     |
|--|---------------|----|--|--|-----------------------------|-----|-----|-----|
|  |               |    |  |  |                             | -36 | 44  | -8  |
|  |               |    |  |  |                             | -48 | 20  | 36  |
|  |               |    |  |  |                             | -28 | 16  | 48  |
|  |               |    |  |  |                             | -40 | 20  | 24  |
|  |               |    |  |  |                             | 36  | -20 | 40  |
|  |               |    |  |  |                             | -40 | 20  | 44  |
|  |               |    |  |  |                             | 0   | -24 | 48  |
|  |               |    |  |  |                             | -8  | -68 | 28  |
|  |               |    |  |  |                             | 40  | -64 | 40  |
|  |               |    |  |  |                             | -36 | -52 | 20  |
|  |               |    |  |  |                             | -36 | -56 | 44  |
|  |               |    |  |  |                             | -4  | -68 | 48  |
|  |               |    |  |  | Rest > Anticipation         | 24  | 20  | 36  |
|  |               |    |  |  |                             | -28 | 24  | 44  |
|  |               |    |  |  |                             | 28  | -28 | 64  |
|  |               |    |  |  |                             | -24 | -24 | 56  |
|  |               |    |  |  |                             | 0   | -16 | 48  |
|  |               |    |  |  |                             | -4  | -56 | 32  |
|  | Ganguli, 1997 | 8  |  |  | Auditory Memory Related D   | -4  | 51  | -23 |
|  |               |    |  |  |                             | -38 | -69 | 3   |
|  |               |    |  |  |                             | 51  | -62 | 1   |
|  |               |    |  |  |                             | -3  | -68 | 11  |
|  |               |    |  |  |                             | 21  | -70 | 15  |
|  |               |    |  |  |                             | -5  | -46 | 18  |
|  |               |    |  |  |                             | 8   | -65 | 15  |
|  |               |    |  |  |                             | -31 | -31 | 39  |
|  | Brown, 2006   | 10 |  |  | Fixation > Prosaccade Respo | -3  | 52  | 27  |
|  |               |    |  |  |                             | 0   | 30  | 9   |
|  |               |    |  |  |                             | 49  | -60 | 31  |
|  |               |    |  |  |                             | -46 | -62 | 33  |
|  |               |    |  |  |                             | 9   | -30 | 71  |
|  |               |    |  |  |                             | -3  | -42 | 31  |
|  |               |    |  |  | Fixation > Antisaccade Resp | -2  | 52  | 32  |
|  |               |    |  |  |                             | 46  | -61 | 32  |
|  |               |    |  |  |                             | -50 | -67 | 35  |
|  |               |    |  |  |                             | -2  | -48 | 29  |
|  |               |    |  |  | Fixation > Nogo Response    | 2   | 54  | 20  |
|  |               |    |  |  | Fixation > Nogo Instruction | 34  | -2  | 58  |

|  |                 |    |  |  |                                 |     |     |     |
|--|-----------------|----|--|--|---------------------------------|-----|-----|-----|
|  |                 |    |  |  |                                 | -30 | -2  | 64  |
|  |                 |    |  |  |                                 | -53 | -25 | 17  |
|  | Andreasen, 1995 | 13 |  |  | Rest > Episodic Memory          | 20  | 56  | -32 |
|  |                 |    |  |  |                                 | 42  | 45  | -15 |
|  |                 |    |  |  |                                 | 29  | 10  | 52  |
|  |                 |    |  |  |                                 | -52 | -43 | -21 |
|  |                 |    |  |  |                                 | 54  | -45 | -25 |
|  |                 |    |  |  |                                 | 50  | -63 | 18  |
|  |                 |    |  |  |                                 | 9   | -55 | 53  |
|  |                 |    |  |  |                                 | -58 | -38 | 36  |
|  |                 |    |  |  |                                 | 57  | -35 | 39  |
|  |                 |    |  |  |                                 | 42  | -11 | -11 |
|  |                 |    |  |  | Rest > Word Generation          | 3   | 48  | -31 |
|  |                 |    |  |  |                                 | 12  | 48  | 54  |
|  |                 |    |  |  |                                 | 49  | -7  | 6   |
|  |                 |    |  |  |                                 | 55  | -42 | -28 |
|  |                 |    |  |  |                                 | -46 | -61 | 22  |
|  |                 |    |  |  |                                 | 52  | -61 | 18  |
|  |                 |    |  |  |                                 | 5   | -52 | -21 |
|  | Dohnel, 2008    | 16 |  |  | All 2-back > Fixation, Normal   | 9   | 38  | 31  |
|  |                 |    |  |  |                                 | 44  | -64 | 42  |
|  | Redcay, 2008    | 10 |  |  | Rest > Forward Speech, Toddler  | -18 | -7  | 3   |
|  |                 |    |  |  |                                 | -17 | -38 | 61  |
|  |                 |    |  |  |                                 | -36 | -28 | 56  |
|  |                 | 10 |  |  | Rest > Forward Speech, 3 Year   | 50  | -6  | 25  |
|  |                 |    |  |  |                                 | 28  | 62  | 0   |
|  |                 |    |  |  |                                 | -10 | -17 | 2   |
|  |                 |    |  |  |                                 | 16  | -20 | 6   |
|  |                 | 10 |  |  | Rest > Backward Speech, Toddler | 15  | 1   | 39  |
|  |                 |    |  |  |                                 | -9  | -18 | 63  |
|  |                 |    |  |  |                                 | -9  | -11 | 45  |
|  |                 |    |  |  |                                 | 4   | -28 | 60  |
|  |                 |    |  |  |                                 | -25 | -19 | 56  |
|  |                 |    |  |  |                                 | -5  | -40 | 58  |
|  |                 |    |  |  |                                 | -5  | -47 | -10 |
|  |                 |    |  |  |                                 | -15 | -16 | 5   |
|  |                 |    |  |  |                                 | 21  | -20 | 5   |
|  |                 | 10 |  |  | Rest > Backward Speech, 3 Year  | -28 | -81 | -6  |



|  |              |    |  |                            |     |     |     |
|--|--------------|----|--|----------------------------|-----|-----|-----|
|  |              |    |  |                            | 0   | 8   | -19 |
|  | Kelley, 2002 | 21 |  | Fixation > All Trials      | 10  | 52  | 2   |
|  |              |    |  |                            | -8  | 54  | 2   |
|  |              |    |  |                            | 6   | 40  | 44  |
|  |              |    |  |                            | -4  | 4   | -10 |
|  |              |    |  |                            | 18  | 34  | 52  |
|  |              |    |  |                            | 34  | 26  | 46  |
|  |              |    |  |                            | 14  | 58  | 28  |
|  |              |    |  |                            | -14 | 50  | 26  |
|  |              |    |  |                            | -24 | 36  | -10 |
|  |              |    |  |                            | 12  | -48 | 50  |
|  |              |    |  |                            | -56 | -58 | 38  |
|  |              |    |  |                            | -34 | -40 | -12 |
|  |              |    |  |                            | -16 | -84 | 18  |
|  |              |    |  |                            | -44 | -76 | 30  |
|  |              |    |  |                            | 24  | -8  | -18 |
|  |              |    |  |                            | 56  | -24 | -14 |
|  | Liu, 2009    | 28 |  | GB37 Acupuncture > Rest (D | -50 | 11  | -3  |
|  |              |    |  |                            | -18 | -72 | 12  |
|  |              |    |  |                            | 3   | -78 | 12  |
|  |              |    |  |                            | -12 | -80 | 26  |
|  |              |    |  |                            | 21  | -55 | 3   |
|  |              |    |  |                            | -30 | -83 | 26  |
|  |              |    |  |                            | 12  | -86 | 35  |
|  |              | 28 |  | K18 Acupuncture > Rest (De | -3  | 55  | 0   |
|  |              |    |  |                            | 3   | -18 | 48  |
|  |              |    |  |                            | 9   | 41  | 3   |
|  |              |    |  |                            | 23  | 26  | -10 |
|  |              | 28 |  | K18 Acupuncture > GB37 Ac  | -42 | -15 | -4  |
|  |              |    |  |                            | 42  | -14 | 12  |
|  |              |    |  |                            | -33 | -15 | -7  |
|  |              |    |  |                            | 30  | -12 | -15 |
|  | Binder, 2005 | 24 |  | Fixation > Nonword         | -57 | -66 | 37  |
|  |              |    |  |                            | -47 | -72 | 40  |
|  |              |    |  |                            | 50  | -58 | 27  |
|  |              |    |  |                            | 46  | -74 | 42  |
|  |              |    |  |                            | 62  | -65 | 32  |
|  |              |    |  |                            | -25 | 26  | 43  |

|  |               |  |   |  |                             |     |     |     |
|--|---------------|--|---|--|-----------------------------|-----|-----|-----|
|  |               |  |   |  |                             | -21 | 58  | 7   |
|  |               |  |   |  |                             | -36 | 20  | 41  |
|  |               |  |   |  |                             | -20 | 36  | 46  |
|  |               |  |   |  |                             | -29 | 53  | -6  |
|  |               |  |   |  |                             | 30  | 54  | 0   |
|  |               |  |   |  |                             | 25  | 30  | 38  |
|  |               |  |   |  |                             | 20  | 60  | 4   |
|  |               |  |   |  |                             | 44  | 17  | 47  |
|  |               |  |   |  |                             | 19  | 50  | -3  |
|  |               |  |   |  |                             | 37  | 27  | 55  |
|  |               |  |   |  |                             | -31 | 10  | -25 |
|  |               |  |   |  |                             | -12 | 38  | -5  |
|  |               |  |   |  |                             | -8  | 23  | -13 |
|  |               |  |   |  |                             | 37  | 45  | -11 |
|  |               |  |   |  |                             | -6  | -54 | 39  |
|  |               |  |   |  |                             | 11  | -58 | 26  |
|  |               |  |   |  |                             | 7   | -43 | 40  |
|  |               |  |   |  |                             | -31 | -40 | -3  |
|  |               |  |   |  |                             | -35 | 15  | -35 |
|  |               |  |   |  |                             | -21 | -21 | 25  |
|  |               |  |   |  |                             | -22 | -38 | 23  |
|  |               |  |   |  |                             | -10 | -68 | 27  |
|  | Boecker, 1998 |  | 7 |  | Rest > Weighted Mean Perf   | 43  | -82 | 16  |
|  |               |  |   |  |                             | 51  | -64 | 23  |
|  |               |  |   |  |                             | 49  | -73 | 2   |
|  |               |  |   |  |                             | -42 | -69 | 30  |
|  |               |  |   |  |                             | -57 | -39 | 0   |
|  |               |  |   |  |                             | -26 | -83 | 35  |
|  |               |  |   |  |                             | -12 | 59  | 12  |
|  |               |  |   |  |                             | 1   | 68  | -2  |
|  |               |  |   |  |                             | -14 | 40  | 41  |
|  |               |  |   |  |                             | -38 | 46  | -8  |
|  |               |  |   |  |                             | -16 | 36  | -3  |
|  |               |  |   |  |                             | -9  | -60 | 28  |
|  |               |  |   |  |                             | 8   | -62 | 24  |
|  |               |  |   |  |                             | -55 | -19 | -11 |
|  | Jancke, 2000  |  | 8 |  | Rest > Auditory Continuatio | 60  | -20 | 4   |
|  |               |  |   |  | Rest > Visual Continuation  | -12 | -88 | 0   |
